# Supplementary material for: Polyphenols in edible plant leaves: an overview of their occurrence and health properties
Source: Royal Society of Chemistry journal article supplement (doi:10.1039/d4fo00509k), 2024-01-01
Supplement: d4fo00509k1.pdf [file d4fo00509k1.pdf]

## Supplementary Information

### Edible plant leaves: an overview of their polyphenol composition, health properties and occurrence.

Anthony Masiala<sup>a</sup>, Audrey Vingadassalon<sup>a\*</sup> and Guylène Aurore<sup>a</sup>

The supplementary data comprises four tables listing the phenolic compounds contained in 50 EPLs belonging to the 4 categories cited in this review. The compounds are listed in ascending order of reference date and then in alphabetical order.

Table S1. Phenolic compounds identified in 15 Green Leaf Vegetables

\*compounds identified in leaves and stems

|                                                                                               |                                                                                                                                                                                                                                                                                                                                                                                                                                                                                                                                                                                                                                                                                                                                                                                                                                                                                                                                                                                                                                                                                                                                                                                                                                                                                                                                                                                                                                                                                                                                                                                                                                                                                                                                                                |
|-----------------------------------------------------------------------------------------------|----------------------------------------------------------------------------------------------------------------------------------------------------------------------------------------------------------------------------------------------------------------------------------------------------------------------------------------------------------------------------------------------------------------------------------------------------------------------------------------------------------------------------------------------------------------------------------------------------------------------------------------------------------------------------------------------------------------------------------------------------------------------------------------------------------------------------------------------------------------------------------------------------------------------------------------------------------------------------------------------------------------------------------------------------------------------------------------------------------------------------------------------------------------------------------------------------------------------------------------------------------------------------------------------------------------------------------------------------------------------------------------------------------------------------------------------------------------------------------------------------------------------------------------------------------------------------------------------------------------------------------------------------------------------------------------------------------------------------------------------------------------|
| <p>Amaranthaceae</p> <p><b><i>Beta vulgaris subsp. vulgaris</i></b> L.</p> <p>Swiss chard</p> | <p>6''-Malonyl-2''-xylosyl vitexin; Isorhamnetin 3-gentiobioside; Kaempferol 3-gentiobioside; Vitexin 2''-xyloside (1); 3-hydroxy-5<math>\alpha</math>,6<math>\alpha</math>-epoxy-<math>\beta</math>-ionone; (+)-Dehydrovomifoliol; Vitexin 2''-O-<math>\beta</math>-D-glucopyranoside; Vitexin 7-O-<math>\beta</math>-D-glucopyranoside (2); Caffeic acid; Chlorogenic acid; p-Coumaric; Ferulic acid; Gallic acid; Kaempferol; Kaempferol 3-gentiobioside; Myricetin; Protocatechuic acid; Quercetin (3); Apigenin 7-rutinoside; Isorhamnetin; Quercetin 7-glucuronide; Rutin; Vitexin 2''-O-rhamnoside (4); Acacetin-C-glucoside; Acetyl isovitexin; Acetyl O-methyl isovitexin; Apigenin-C-pentoside-C-hexoside; Isovitexin; Isovitexin hexoside; Isovitexin pentoside; isoswertisin 2'' acetate; Vitexin (5); Myricitrin acid; Rosmarinic acid (6); p-Coumaric acid hexoside; p-Coumaroylcaffeic acid; Ferulic acid derivative 1; Ferulic acid derivative 2; Ferulic acid hexoside; Isorhamnetin dihexoside; Isorhamnetin rutinoside; Luteolin dihexoside; Malonylpentosylvitexin; Vitexin hexoside; Vitexin hexoside derivative; Vitexin pentoside (7)</p>                                                                                                                                                                                                                                                                                                                                                                                                                                                                                                                                                                                               |
| <p>Amaranthaceae</p> <p><b><i>Spinacia oleracea</i></b> L.</p> <p>Spinach</p>                 | <p>5,2',3'-trihydroxy-4'-methoxy-6,7-methylenedioxyflavonol 3-O-<math>\beta</math>-glucuronide; 5,3'-dihydroxy-4'-methoxy-6,7-methylenedioxyflavonol 3-O-<math>\beta</math>-glucuronide; 5,6-dihydroxy-7,3',4'-trimethoxyflavonol 3-O-<math>\beta</math>-glucuronide; 5,6,3',4'-tetrahydroxy-7-methoxyflavonol 3-O-disaccharide; 5,6,3'-trihydroxy-7,4'-dimethoxyflavonol 3-O-<math>\beta</math>-glucuronide; 5,6,4'-trihydroxy-7,3'-dimethoxyflavonol 3-O-disaccharide; 5-hydroxy-3',4'-dimethoxy-6,7-methylenedioxyflavonol 3-O-<math>\beta</math>-glucuronide; 5,8,4'-trihydroxyflavanone; 7,8,4'-trihydroxyflavanone (8); trans-Cinnamic acid; Ellagic acid (9); Catechin; Chlorogenic acid; m-Coumaric acid; o-Coumaric acid; p-Coumaric acid; Epicatechin; Epicatechin gallate; Ferulic acid; Gallic acid; Gallocatechin; Gentisic acid; m-hydroxybenzoic acid; p-hydroxybenzoic acid; Kaempferol; Kaempferol 3-O-glucoside; Luteolin; Luteoline 7-O-glucoside; Luteoline 7-O-rutinoside; Myricetin; Myricetin 3-O-glucoside; Patuletin; Protocatechuic acid; Quercetin; Quercetin 3-O-glucoside; Quercetin 3-O-rhamnoside; Quercetin 3-O-rutinoside; <math>\alpha</math> – resorcylic acid; Sinapic acid; Spinacetin; Syringic acid; Vanillic acid (10); 5,3',4'-Trihydroxy-3-methoxy-6,7-methylenedioxyflavone; 5,3',4'-Trihydroxy-3-methoxy-6,7-methylenedioxyflavone 4'-glucuronide; 5,4'-Dihydroxy-3-methoxy-6,7-methylenedioxyflavone; 5,4'-Dihydroxy-3-methoxy-6,7-methylenedioxyflavone 4'-glucuronide; 5,4'-Dihydroxy-3,3'-dimethoxy-6,7-methylenedioxyflavone; 5,4'-Dihydroxy-3,3'-dimethoxy-6,7-methylenedioxyflavone 4'-glucuronide; Jaceidin; Jaceidin-4'-glucuronide; Jaceosidin; Patuletin I; Patuletin II; Patuletin III; Patuletin-</p> |

|                                                                                    |                                                                                                                                                                                                                                                                                                                                                                                                                                                                                                                                                                                                                                                                                                                                                                                                                                                                                                                                                                                                                                                                                                                                                                                                                                                                                                                                                                                                                                                                                                                                                                                                                          |
|------------------------------------------------------------------------------------|--------------------------------------------------------------------------------------------------------------------------------------------------------------------------------------------------------------------------------------------------------------------------------------------------------------------------------------------------------------------------------------------------------------------------------------------------------------------------------------------------------------------------------------------------------------------------------------------------------------------------------------------------------------------------------------------------------------------------------------------------------------------------------------------------------------------------------------------------------------------------------------------------------------------------------------------------------------------------------------------------------------------------------------------------------------------------------------------------------------------------------------------------------------------------------------------------------------------------------------------------------------------------------------------------------------------------------------------------------------------------------------------------------------------------------------------------------------------------------------------------------------------------------------------------------------------------------------------------------------------------|
|                                                                                    | <p>3-glucoside; Patuletin-3-gentiobioside; Patuletin-3-[apiosyl-(1-2)]-glucoside; Patuletin-3-glucosyl-(1-6)-[apiosyl-(1-2)]-glucoside; Patuletin-3-(2''-feroylglucosyl)-(1-6)-glucoside; Patuletin-3-[2''-feruloylglucosyl-(1-6)]-[apiosyl-(1-2)]-glucoside; Spinacetin I; Spinacetin II; Spinacetin III; Spinacetin IV; Spinacetin V; Spinacetin VI; Spinacetin-3-glucoside; Spinacetin-3-gentiobioside; Spinacetin-3-[apiosyl-(1-2)]-glucoside; Spinacetin-3-glucosyl-(1-6)-[apiosyl-(1-2)]-glucoside; Spinacetin-3-(2''-feroylglucosyl)-(1-6)-glucoside; Spinacetin-3-[2''-feroylglucosyl-(1-6)]-[apiosyl-(1-2)]-glucoside; Spinatoside (11); Patuletin-3-O-(2''-coumaroylglucosyl)-(1→6)-glucoside; Patuletin-3-O-(2''-coumaroylglucosyl)-(1→6)-[apiosyl-(1→2)]-glucoside; Rhamnetin-3-O-glucosyl-(1→5)-[apiosyl-(1→2)]-glucoside; Spinacetin 3-O-(2''-coumaroylglucosyl)-(1→6)-[apiosyl-(1→2)]-glucoside; Spinacetin-3-O-(2''-coumaroylglucosyl)-(1→6)-glucoside(12)</p>                                                                                                                                                                                                                                                                                                                                                                                                                                                                                                                                                                                                                                           |
| <p>Amaryllidaceae</p> <p><i>Allium ampeloprasum var. porrum</i> L.</p> <p>Leek</p> | <p>Astragaline;Kaempferol-3-O-[2-O-(trans-3-methoxy-4-hydroxycinnamoyl)]-β-d-glucopyranosyl-(1→6)-O-β-d-glucopyranoside; Kaempferol-3-O-[2-O-(trans-3-methoxy-4-hydroxycinnamoyl)]-β-d-galactopyranosyl-(1→4)-O-β-d-glucopyranoside; Kaempferol-3-O-neohesperidoside(13); Kaempferol-3-O-[2-O-(malonyl)]-B-D-hexosyl-(1→4)-O-B-D-glucopyranoside; Kaempferol-3-O-(6''-O-malonyl)-B-D-glucopyranoside (14); Kaempferol derivative; Kaempferol hexose; Kaempferol dihexose; Kaempferol malonyl dihexose 1; Kaempferol malonyl dihexose 2; Kaempferol malonyl hexose; Kaempferol trihexose; Quercetin derivative; Quercetin malonyl dihexose (15); Apigenin; Caffeic acid; Chlorogenic acid; Dihydroxybenzoic acid; Ferulic acid; Gallic acid; Kaempferol glucoside; Myricetin; Naringenin; Protocatechuic acid; Quercetin; Quercetin glucoside; Rosmarinic acid; Rutin; Sinapic acid; Syringic acid; Vanillic acid (16)</p>                                                                                                                                                                                                                                                                                                                                                                                                                                                                                                                                                                                                                                                                                                |
| <p>Apiaceae</p> <p><i>Apium graveolens</i> L.</p> <p>Celery</p>                    | <p>Apigenin; Caffeic acid; Catechin; Chrysin; Chlorogenic acid; Cinnamic acid; p-Coumaric acid; Ellagic acid; Ferulic acid; Gallic acid; Hesperitin; Luteolin; Protocatechuic acid; Pyrogallol; Quercetrin; Rosmarinic acid; Salicylic acid; Syringic acid (17); Aesculin; Apigenin-C-dihexoside; Apigenin diacyl-O-deoxyhexosyl pentoside; Apigenin-O-acyl (trimethyl ether) methoxy galloyl quinoyl (acyl pentosyl) pentoside; Apigenin-O-acyl hexosyl pentoside; Apigenin-O-dihexosyl deoxy hexoside; Apigenin-O-dihexosyl pentoside; Apigenin-O-hexosyl dimethyl caffoeoyl-C-pentoside; Azelaic acid; Caffeoylequinic acid; Chrysoeriol; Chrysoeriol acyl-O-hexosyl pentoside; Chrysoeriol malonyl-O-hexosyl pentoside; Chrysoeriol-O-dihexosyl pentoside; Chrysoeriol-O-hexoside deoxyhexoside hexoside; Chrysoeriol-O-hexosyl pentoside; Cleomiscosin A; Coumaroylquinic acid; Dihydroxybiscoumarin; Dillapional-O-dihexoside; Feruloylquinic acid; Homovanillyl-O-hexoside; Hydroxyisophthalic acid; Hydroxypropofol O-glucuronide; Isofraxidin; Isofraxidin-O-hexoside; Licocoumarone; Luteolin-O-hexosyl pentoside; Noidesol A; Ptelatoside B; Syringoylquinic acid; Uralenneoside (18); Apiin; Apigenin 7-O-[β-d-apiofuranosyl(1→2)-(6''-O-malonyl)]-β-d-glucopyranoside; Chrysoeriol 7-O-β-d-apiofuranosyl(1→2)-β-d-glucopyranoside; Luteolin 7-O-β-d-apiofuranosyl(1→2)-β-d-glucopyranoside; Luteolin 7-O-[β-d-apiofuranosyl(1→2)-(6''-O-malonyl)]-β-d-glucopyranoside; Luteolin 7-O-β-d-glucopyranoside (19); 3,7-dihydroxyflavone; Cyanidin; Diosmetin; Elemicin; Peucedanin; Rutin; Safflomin A (20)*</p> |
|                                                                                    | <p>Caffeoylglucose; Caffeoyleshikimic esters; Dicaffeoyltartaric esters (21);</p>                                                                                                                                                                                                                                                                                                                                                                                                                                                                                                                                                                                                                                                                                                                                                                                                                                                                                                                                                                                                                                                                                                                                                                                                                                                                                                                                                                                                                                                                                                                                        |

|                                                                                                           |                                                                                                                                                                                                                                                                                                                                                                                                                                                                                                                                                                                                                                                                                                                                                                                                                                                                                                                                                                                                                                                                                                                                                                                                                                                                                                                                                                                                                                                                                                                                                                                                                                                                                                                                                                                                                                                                                                                                                                                                                                                                                                                                                                                                                                                                                                                                       |
|-----------------------------------------------------------------------------------------------------------|---------------------------------------------------------------------------------------------------------------------------------------------------------------------------------------------------------------------------------------------------------------------------------------------------------------------------------------------------------------------------------------------------------------------------------------------------------------------------------------------------------------------------------------------------------------------------------------------------------------------------------------------------------------------------------------------------------------------------------------------------------------------------------------------------------------------------------------------------------------------------------------------------------------------------------------------------------------------------------------------------------------------------------------------------------------------------------------------------------------------------------------------------------------------------------------------------------------------------------------------------------------------------------------------------------------------------------------------------------------------------------------------------------------------------------------------------------------------------------------------------------------------------------------------------------------------------------------------------------------------------------------------------------------------------------------------------------------------------------------------------------------------------------------------------------------------------------------------------------------------------------------------------------------------------------------------------------------------------------------------------------------------------------------------------------------------------------------------------------------------------------------------------------------------------------------------------------------------------------------------------------------------------------------------------------------------------------------|
| <p>Asteraceae</p> <p><b><i>Cichorium endivia</i> ssp. <i>Foliosum</i> L.</b></p> <p>Endive / Escarole</p> | <p>Caffeoylmalic acid ; Kaempferol-3-O-glucuronide (22); 1,3-dicaffeoylquinic acid; 1,4-dicaffeoylquinic acid; 3,4-Dicaffeoylquinic acid (isochlorogenic acid B); 3,5-Dicaffeoylquinic acid (isochlorogenic acid A); 3-caffeoylquinic acid (chlorogenic acid); 5-caffeoylquinic acid (neochlorogenic acid); Cis-5-feruloylquinic acid; Trans-5-feruloylquinic acid; Caffeic acid; Caffeoyl tartaric acid dimethyl ester; Caffeoylquinic acid rhamnoside; Trans-caftaric acid; Chicoric acid; p-coumaric acid; Galloyl derivative; Kaempferide derivative; Kaempferol-3-O-glucoside; Kaempferol-3-O-(6''-malonyl)-glucoside; Kaempferol-7-O-glucoside; Kaempferol-7-O-(6''-malonyl)-glucoside; Myricetin-3-O-glucoside; Pinocembrin-O-rhamnoside; Quercetin-3,7-di-O-glucoside; Quercetin-7-O-glucoside; Quercetin-monoglucuronide; Quercetin-monoglucuronil-O-(6''-malonyl)glucoside; Vanillic acid derivative (23); 4-hydroxy-phenyl acetic acid; Aesculetin; Cichoriin; Ferulic acid; Quercetin (24); Caffeoylquinic acid-O-hexoside; Coumaroylquinic acid; Dicaffeoylquinic acid-O-hexoside; Dicaffeoylquinic acid-O-malonyldihexoside; Dicaffeoylquinic acid rhamnoside; Dihydroxylactucopicrin; Isorhamnetin-O-dihexoside; Kaempferol-O-acetylhexoside; Kaempferol-O-dihexoside; Kaempferol-O-hexoside-uronide; Kaempferol-O-malonyldihexoside; Lactucopicrin (25)</p>                                                                                                                                                                                                                                                                                                                                                                                                                                                                                                                                                                                                                                                                                                                                                                                                                                                                                                                                                           |
| <p>Asteraceae</p> <p><b><i>Cichorium intybus</i> subsp. L.</b></p> <p>Green chicory / Red chicory</p>     | <p>Cichoriin (26); Cyanidin-3-O-(6''-malonyl-β-glucopyranoside); Delphinidin-3,5-di-O-(6-O-malonyl-β-D-glucoside); Delphinidin-3-O-(6-O-malonyl-β-D-glucoside)-5-O-β-D-glucoside; Delphinidin-3-O-β-D-glucoside-5-O-(6-O-malonyl-β-D-glucoside); Delphinidin-3,5-di-O-β-D-glucoside(27); 3,5,7-trihydroxy-3',4'-dimethoxy-flavone-7-O-β-D-galactopyranosyl-(1→4)-β-D-xylopyranosyl-3-O-α-L-rhamnopyranoside; 3,5,7-trihydroxy-6,4'-dimethoxyflavone; Ladanetin; Luteolin; Spicoside(28); 1,3-Dicaffeoylquinic acid; 1,4-Dicaffeoylquinic acid; 3,4-Dicaffeoylquinic acid (isochlorogenic acid B); 3,5-Di-caffeoylquinic acid; 4-Caffeoylquinic acid (cryptochlorogenic acid); 4-O-feruloylquinic acid; 5-Caffeoylquinic acid (neochlorogenic acid); 5-Caffeoylshikimic acid; 5-O-feruloylquinic acid; 5-p-Coumaroylquinic acid; Apigenin-7-O-glucoside; Cyanidin; Cyanidin-3-O-(6''-O-acetyl)-glucoside; Cyanidin-3-O-galactoside; Cyanidin-3-O-glucoside; Dimethoxycinnamoyl shikimic acid; Isorhamnetin-7-O-glucuronide; Isorhamnetin-7-O-(6''-O-acetyl)-glucoside; Isorhamnetin-7-O-(6''-O-malonyl)-glucoside; Isorhamnetin-7-O-glucoside; Isorhamnetin-7-O-(6''-O-malonyl)-glucoside; Kaempferide glucuronide; Kaempferol; Kaempferol-3-O-(6''-O-acetyl)-glucoside; Kaempferol-3-O-(6''-O-malonyl)-glucoside; Kaempferol-3-O-glucoside; Kaempferol-3-O-glucuronide; Kaempferol-3-O-glucuronide-7-O-glucoside; Kaempferol-7-O-(6''-O-acetyl)-glucoside; Kaempferol-7-O-glucoside; Kaempferol-7-O-glucuronide; Kaempferol-7-O-neohesperidoside; Kaempferol-7-O-(6''-O-malonyl)-glucoside; Kaempferol-7-O-rutinoside; Kaempferol-7-O-(6''-O-acetyl)-glucoside; Malvidin-3-O-glucoside; Myricetin-7-O-(6''-O-malonyl)-glucoside; Pelargonidin-3-O-monoglucuronide; Petunidin-3-O-(6''-O-malonyl)-glucoside; Quercetin-3-O-(6''-O-malonyl)-glucoside; Quercetin-7-O-galactoside; Quercetin-7-O-glucoside; Quercetin-7-O-glucuronide; Quercetin-7-O-(6''-O-acetyl)-glucoside; Quercetin-7-O-p-coumaroylglucoside; trans-Caftaric acid; Tricin-3-O-glucoside (29); Catechin; Dihydroxy p-coumaric acid; Dihydroxybenzoic acid; Hydroxybenzoic acid; Protocatechuic acid; Quercetin-3,4-O-diglucoside; Quercetin-3-O-glucoside; Quercetin-3-O-rutinoside (Rutin) (30); Gallic acid; Cinnamic acid; p-Coumaric acid; Ellagic acid (31)</p> |
|                                                                                                           | <p>Caffeoyltartaric acid; Chlorogenic acid; Cyanidin 3-malonylglucoside;</p>                                                                                                                                                                                                                                                                                                                                                                                                                                                                                                                                                                                                                                                                                                                                                                                                                                                                                                                                                                                                                                                                                                                                                                                                                                                                                                                                                                                                                                                                                                                                                                                                                                                                                                                                                                                                                                                                                                                                                                                                                                                                                                                                                                                                                                                          |

|                                                                                                          |                                                                                                                                                                                                                                                                                                                                                                                                                                                                                                                                                                                                                                                                                                                                                                                                                                                                                                                                                                                                                                                                                                                                                                                                                                                                                                                                                                                                                                                                                                                 |
|----------------------------------------------------------------------------------------------------------|-----------------------------------------------------------------------------------------------------------------------------------------------------------------------------------------------------------------------------------------------------------------------------------------------------------------------------------------------------------------------------------------------------------------------------------------------------------------------------------------------------------------------------------------------------------------------------------------------------------------------------------------------------------------------------------------------------------------------------------------------------------------------------------------------------------------------------------------------------------------------------------------------------------------------------------------------------------------------------------------------------------------------------------------------------------------------------------------------------------------------------------------------------------------------------------------------------------------------------------------------------------------------------------------------------------------------------------------------------------------------------------------------------------------------------------------------------------------------------------------------------------------|
| <p>Asteraceae</p> <p><b><i>Lactuca sativa</i></b> L.</p> <p>Laitue</p>                                   | <p>Dicaffeoyltartaric acid; Dicaffeoylquinic acid; Quercetin 3-glucoside; Quercetin 3-glucuronide; Quercetin 3-malonylglucoside; Quercetin 7-glucoside 3-(6''-malonylglucoside) (32); 3,5-di-O-caffeoylquinic acid; Meso-di-O-caffeoyltartaric acid; O-caffeoylmalic acid; O-caffeoylquinic acid (33); 5-p-coumaroylquinic acid; p-Coumaroyl caffeoyl tartaric acid; p-Coumaroyl Tartaric acid; Di-p-coumaroyl tartaric acid (34); Durenol; Thymol (35); Caffeoylferuloylquinic acid; Esculin; Feruloyl tartaric acid; Isorhamnetin-3-O-glucuronide; Kaempferide-3-O-glucuronide; Methylcaffeoylferuloyltartaric acid; Quercetin (36); Anthocyanin; Epicatechin; Isorhamnetin; Kaempferol; Myricetin (37); 1-O-caffeoylquinic acid; 5-Feruloylquinic acid; 5-O-caffeoylquinic acid (neochlorogenic acid); Kaempferol malonylglucoside (38); 1,3-dicaffeoylquinic acid; Hydroxyphenylpyruvic acid; Hydroxycoumarin; Luteolin derivative; Luteolin-7-o-glucoside; Neohesperidin; Tetrahydroxyflavone; 3-p-Coumaroylquinic acid; Umbelliferone (39); cis 5-O-p-Coumaroylquinic acid; trans 5-O-p-Coumaroylquinic acid; Caffeoyl malate; Caffeoyltartaric acid hexoside 1; Caffeoyltartaric acid hexoside 2; p-Coumaric acid; Cryptochlorogenic acid; Dihydroxybenzoic acid hexoside; Esculetin glucoside; Gallic acid; Galloyl hexoside; Kaempferol-3-O-glucuronide; Quercetin-3-(6''-acetylglucoside); Quercetin-3-O-galactoside; Sinapic acid; Sinapoyl hexoside derivative (7); Apiin; Rosmarinic acid (40)</p> |
| <p>Asteraceae</p> <p><b><i>Valeriana locusta</i></b> L.</p> <p>Lamb's lettuce</p>                        | <p>Caffeic acid; Chlorogenic acid; Diosmetin; Luteolin; Protocatechuic acid (41); Genistein; Kaempferol-3-O-rutinoside; Rutin (42); p-Coumaric acid; Hesperidin; Sinapic acid (43); 4-Caffeoylquinic acid (cryptochlorogenic acid); Caffeoylquinic hexoside; Dicaffeoylquinic hexoside; Luteolin-pentosyl hexoside; Genistin (44); 3,4-Dicaffeoylquinic acid (isochlorogenic acid B); 3,5-Dicaffeoylquinic acid (isochlorogenic acid A); 4,5-Dicaffeoylquinic acid (isochlorogenic acid C); 5-Caffeoylquinic acid (neochlorogenic acid); cis-5-Caffeoylquinic acid (neochlorogenic acid); cis 5-O-p-Coumaroylquinic acid; trans 5-O-p-Coumaroylquinic acid; cis 5-O-p-Feruloylquinic acid; trans 5-O-p-Feruloylquinic acid; Acacetin-rutinoside; Apigenin-7-O-glucoside; Apigenin-rutinoside; Caffeic acid-O-hexoside 1; Caffeic acid-O-hexoside 2; Caffeic acid-O-hexoside 3; Diosmetin-apiosylglucoside; Feruloyl-caffeoylquinic acid; Isorhamnetin-rutinoside; Luteolin-7-O-aposylglucoside; Luteolin-7-O-glucoside; Luteolin-7-rutinoside; Quercetin; Quercetin-3-O-glucoside; Quercetin-glucuronide; Sinapic acid-hexoside 1; Sinapic acid-hexoside 2 (45); 4-Hydroxyphenylacetyl glucoside derivative; Caffeic acid hexoside derivative; Dicaffeoylquinic acid; Diosmin (diosmetin-7-O-rutinoside) (7)</p>                                                                                                                                                                                                |
| <p>Brassicaceae</p> <p><b><i>Brassica oleracea var. capitata</i></b> L.</p> <p>White and red cabbage</p> | <p>Kaempferol-3-O-(2-E-caffeoyl)-diglucopyranoside-7-O-glucopyranoside; Kaempferol-3-O-(2-E-feruloyl)-diglucopyranoside-7-O-glucopyranoside; Kaempferol-3-O-(2-E-p-coumaroyl)-diglucopyranoside-7-O-glucopyranoside; Kaempferol-3-O-(2-E-sinapoyl)-diglucopyranoside-7-O-glucopyranoside; Kaempferol-3-O-diglucopyranoside-7-O-glucopyranoside; Quercetin-3-O-(2-E-caffeoyl)-diglucopyranoside-7-O-glucopyranoside; Quercetin-3-O-(2-E-feruloyl)-diglucopyranoside-7-O-glucopyranoside (46); Cyanidin-3-(caffeoyl-p-coumaroyl)-sophoroside-5-glucoside; Cyanidin-3-(feruloyl)-sophoroside-5-glucoside; Cyanidin-3-(feruloylferuloyl)-diglucoside-5-glucoside; Cyanidin-3-(feruloylferuloyl)-trisophoroside-5-glucoside; Cyanidin-3-(glucosylferuloyl)-sophoroside-5-glucoside; Cyanidin-3-(glucosylsinapoyl)-sophoroside-5-glucoside; Cyanidin-3-(p-coumaroyl)-sophoroside-5-glucoside; Cyanidin-3-(sinapoyl)-sophoroside-5-glucoside; Cyanidin-3-(sinapoylferuloyl)-</p>                                                                                                                                                                                                                                                                                                                                                                                                                                                                                                                                       |

|                                                                                    |                                                                                                                                                                                                                                                                                                                                                                                                                                                                                                                                                                                                                                                                                                                                                                                                                                                                                                                                                                                                                                                                                                                                                                                                                                                                                                                                                                                                                                                                                                                                                                                                                                                                                                                                                                                                                                                                                                                                                                                                                                                                                                                                                                                                                     |
|------------------------------------------------------------------------------------|---------------------------------------------------------------------------------------------------------------------------------------------------------------------------------------------------------------------------------------------------------------------------------------------------------------------------------------------------------------------------------------------------------------------------------------------------------------------------------------------------------------------------------------------------------------------------------------------------------------------------------------------------------------------------------------------------------------------------------------------------------------------------------------------------------------------------------------------------------------------------------------------------------------------------------------------------------------------------------------------------------------------------------------------------------------------------------------------------------------------------------------------------------------------------------------------------------------------------------------------------------------------------------------------------------------------------------------------------------------------------------------------------------------------------------------------------------------------------------------------------------------------------------------------------------------------------------------------------------------------------------------------------------------------------------------------------------------------------------------------------------------------------------------------------------------------------------------------------------------------------------------------------------------------------------------------------------------------------------------------------------------------------------------------------------------------------------------------------------------------------------------------------------------------------------------------------------------------|
|                                                                                    | <p>diglucoside-5-glucoside; Cyanidin-3-(sinapoylsinapoyl)-diglucoside-5-glucoside; Cyanidin-3-(sinapoylsinapoyl)-trisophoroside-5-glucoside; Cyanidin-3-(sinapoylferuloyl)-trisophoroside-5-glucoside; Cyanidin-3-sophoroside-5-glucoside; Proanthocyanidin-3-glucoside (47); 1,2,2'-trisinapoylgentiobiose; 1,2-disinapoylgentiobiose; 1,2'-disinapoyl-2-feruloylgentiobiose; 1-sinapoyl-2-feruloylgentiobiose; 3-caffeoyl quinic acid; 3-p-coumaroyl quinic acid; 4-caffeoyl quinic acid; 4-feruloyl quinic acid; Kaempferol-3,7-di-O-glucoside; Kaempferol-3-O-diglucoside; Kaempferol-3-O-(caffeoyl)-sophroside; Kaempferol-3-O-(methoxycaffeoyl)-sophoroside; Kaempferol-3-O-(methoxycaffeoyl)-sophoroside-7-O-glucoside; Kaempferol-3-O-(p-coumaroyl)-sophroside; Kaempferol-3-O-sophoroside; Kaempferol-3-O-triglucoside-7-O-glucoside; Kaempferol-7-O-glucoside; Quercetin-3-O-(feruloyl)-sophroside; Quercetin-3-O-(sinapoyl)-sophoroside-7-O-glucoside; Quercetin-3-O-sophoroside; Sinapic acid; Sinapylglucoside (48); Acacetin; Benzoic acid; Caffeic acid; Catechin; Chlorogenic acid; Cinnamic acid; p-Coumaric acid; Coumarin; Ferulic acid; Gallic acid; Genistein; Kaempferol; Luteolin; Myricetin; Pyrogallol; Quercetin; Rutin; Vanillic acid (49); Cyanidin-3-(caffeoyl)-diglucoside-5-glucoside; Cyanidin-3-(feruloyl)-triglucosides-5-glucoside; Cyanidin-3-(feruloyl)(sinapoyl)-diglucoside-5-glucoside; Cyanidin-3-(feruloyl)(sinapoyl)-triglucoside-5-glucoside; Cyanidin-3-(sinapoyl)-triglucoside-5-glucoside (50); Cyanidin-3,5-diglucoside; Cyanidin-3-O-glucoside; Cyanidin-3-(feruloyl)-5-glucoside; Cyanidin-3-(sinapoyl)-glucoside-5-glucoside; Cyanidin-3-[2-glucosyl-6-rhamnosyl-glucoside]; Kaempferol-3-(disinapoyl)-sophoroside-7-glucoside; Kaempferol-3-(hydroxycoumaroyl)-sophoroside-7-glucoside; Kaempferol-3-(hydroxyferuloyl)-glucoside-7-glucoside; Kaempferol-3-(hydroxyferuloyl)-sophoroside-7-glucoside; Kaempferol-3-(hydroxysinapoyl)-sophoroside-7-glucoside (51); Kaempferol-malonyl-3-O-sophorotrioside; Naringenin chalcone; Protocatechuic aldehyde; Quercetin-3-O-glucoside; Quercetin-malonyl-3-O-sophorotrioside; Quercetin-O-rutinoside-hexose (52)</p> |
| <p>Brassicaceae<br/><i>Brassica oleracea</i> var. <i>sabellica</i> L.<br/>Kale</p> | <p>Caffeic acid; p-Coumaric acid; Ferulic acid; Gallic acid; p-Hydroxybenzoic acid; Protocatechuic acid; Salicylic acid; Sinapic acid; Syringic acid; Vanillic acid (53); Caffeoylquinic acid; Diferuloyl-triglucoside; Disinapoyl-feruloyl-triglucoside; Hydroxycinnamic derivative; Kaempferol-3-diglucoside; Kaempferol-3-diglucoside-7-diglucoside; Kaempferol-3-diglucoside-7-glucoside; Kaempferol-3-glucoside-7-glucoside; Kaempferol-3-triglucoside-7-diglucoside; Kaempferol-3-disinapoyl-triglucoside-7-diglucoside; Kaempferol-3-disinapoyl-triglucoside-7-glucoside; Quercetin-3-caffeoyl-diglucoside-7-glucoside; Quercetin-3-diglucoside; Quercetin-3-diglucoside-7-diglucoside; Quercetin-3-diglucoside-7-glucoside; Quercetin-3-disinapoyl-triglucoside-7-diglucoside; Quercetin-3-disinapoyl-triglucoside-7-glucoside; Quercetin-3-feruloyl-diglucoside-7-diglucoside; Quercetin-3-feruloyl-diglucoside-7-glucoside; Quercetin-3-hydroxyferuloyl-diglucoside-7-diglucoside; Quercetin-3-hydroxyferuloyl-diglucoside-7-glucoside; Quercetin-3-sinapoyl-diglucoside; Quercetin-3-sinapoyl-diglucoside-7-diglucoside; Quercetin-3-sinapoyl-triglucoside-7-diglucoside; Quercetin-3-triglucoside-7-diglucoside (54); Benzoyl-sinapoyl-triglucoside; Cyanidin 3-sinapoyl-caffeoyl-diglucoside-5-glucoside; Cyanidin-3-sinapoyl-diglucoside-5-glucoside; Cyanidin-3-sinapoyl-feruloyl-diglucoside-5-diglucoside; Cyanidin-3-sinapoyl-feruloyl-diglucoside-5-glucoside; Cyanidin-3-sinapoyl-p-coumaroyl-diglucoside-5-glucoside; Cyanidin-3-triglucoside-5-glucoside; Diprotocatechuic acid-diglucoside; Disinapoyl-</p>                                                                                                                                                                                                                                                                                                                                                                                                                                                                                                                                                                                  |

|                                                                                                  |                                                                                                                                                                                                                                                                                                                                                                                                                                                                                                                                                                                                                                                                                                                                                                                                                                                                                                                                                                                                                                                                                                                                                                                                                                                                                                                                                                                                                                                                                                                                                                                                                                                                                                                                                                                                                                                                                                                                                                                                                                                                                                                                                                                                                                                                                                                                                                                                                                                                                                                                                                                    |
|--------------------------------------------------------------------------------------------------|------------------------------------------------------------------------------------------------------------------------------------------------------------------------------------------------------------------------------------------------------------------------------------------------------------------------------------------------------------------------------------------------------------------------------------------------------------------------------------------------------------------------------------------------------------------------------------------------------------------------------------------------------------------------------------------------------------------------------------------------------------------------------------------------------------------------------------------------------------------------------------------------------------------------------------------------------------------------------------------------------------------------------------------------------------------------------------------------------------------------------------------------------------------------------------------------------------------------------------------------------------------------------------------------------------------------------------------------------------------------------------------------------------------------------------------------------------------------------------------------------------------------------------------------------------------------------------------------------------------------------------------------------------------------------------------------------------------------------------------------------------------------------------------------------------------------------------------------------------------------------------------------------------------------------------------------------------------------------------------------------------------------------------------------------------------------------------------------------------------------------------------------------------------------------------------------------------------------------------------------------------------------------------------------------------------------------------------------------------------------------------------------------------------------------------------------------------------------------------------------------------------------------------------------------------------------------------|
|                                                                                                  | <p>diglucoside; Disinapoyl-feruloyl-diglucoside; Feruloyl-triglucoside; Kaempferol-3-feruloyl-diglucoside-7-diglucoside; Kaempferol-3-feruloyl-triglucoside-7-diglucoside; Kaempferol-3-sinapoyl-diglucoside-7-diglucoside; Kaempferol-3-sinapoyl-triglucoside-7-diglucoside (55); Kaempferol-3-O-(caffeoyl)-sophoroside; Kaempferol-3-O-(caffeoyl)-sophoroside-7-O-glucoside; Kaempferol-3-O-(feruloyl)-sophoroside-7-O-glucoside; Kaempferol-3-O-(methoxycaffeoyl)-sophoroside; Kaempferol-3-O-(methoxycaffeoyl)-sophoroside-7-O-glucoside; Kaempferol-3-O-(p-coumaroyl)-sophoroside; Kaempferol-3-O-(p-coumaroyl)-sophoroside-7-O-glucoside; Kaempferol-3-O-(sinapoyl)-sophoroside; Kaempferol-3-O-(sinapoyl)-sophoroside-7-O-glucoside; Kaempferol-3-O-sophoroside; Kaempferol-3-O-triglucoside-7-O-glucoside; Quercetin-3-O-(feruloyl)-sophoroside; Quercetin-3-O-sophoroside (48); Cyanidin 3-(caffeoyl)(p-coumaroyl)diglucoside-5-glucoside; Cyanidin 3-(p-coumaroyl)diglucoside-5-glucoside; Cyanidin 3-diglucoside-5-glucoside; Cyanidin 3-(sinapoyl)glucoside-5-glucoside (56)</p>                                                                                                                                                                                                                                                                                                                                                                                                                                                                                                                                                                                                                                                                                                                                                                                                                                                                                                                                                                                                                                                                                                                                                                                                                                                                                                                                                                                                                                                                                       |
| <p>Brassicaceae<br/><i>Brassica rapa var. chinensis</i> L.<br/>Bok choy (cabbage) / Pak choi</p> | <p>Isorhamnetin-3,7-diglucoside; Isorhamnetin-3-glucoside; Kaempferol-3-coumaroyl-sophoroside; Kaempferol-3-coumaroyl-sophoroside-7-glucoside; Kaempferol-3-caffeoyl-sophoroside; Kaempferol-3-caffeoyl-sophoroside-7-glucoside; Kaempferol-3-feruloyl-sophoroside; Kaempferol-3-feruloyl-sophoroside-7-glucoside; Kaempferol-3-glucoside; Kaempferol-3-methoxycaffeoyl-sophoroside; Kaempferol-3-methoxycaffeoyl-sophoroside-7-glucoside; Kaempferol-3-permethoxycinnamoyl-sophoroside; Kaempferol-3-sinapoyl-sophoroside; Kaempferol-3-sinapoyl-sophoroside-7-glucoside; Kaempferol-3-sophoroside; Kaempferol-3-sophoroside-7-glucoside; Quercetin-3,7-diglucoside; Quercetin-3-caffeoyl-sophoroside-7-glucoside; Quercetin-3-sophoroside; Quercetin-3-sophoroside-7-glucoside (57); Caffeic acid; Caffeoylglycoside; Caffeoylmalate; Coumaroylmalate; Coumaroylquinic acid (isomer 1); Coumaroylquinic acid (isomer 2); Disinapoyldiglycoside; Disinapoylferuloyldiglycoside; Feruloylglycoside; Feruloylmalate; Feruloylquinic acid; Hydroxyferulic acid; Hydroxyferuloylmalate; Kaempferol-3-O-hydroxyferuloyldiglucoside-7-O-glucoside; Monocaffeoylquinic acid (isomer 1); Monocaffeoylquinic acid (isomer 2); Sinapic acid; Sinapoylglycoside; Sinapoylferuloyldiglycoside; Sinapoylmalate; Trisinapoyldiglycoside (58); cis-Ferulic acid; trans-Ferulic acid; p-Hydroxybenzaldehyde; Vanillin; Vanillic acid (59); Chlorogenic acid; trans-Cinnamic acid; Cyanidin 3,5-diglucoside; Cyanidin 3-(feruloyl)diglucoside-5-glucoside; Cyanidin 3-(feruloyl)sinapoyl)diglucoside-5-(malonyl)glucoside; Cyanidin 3-(hydroxyferuloyl)diglucoside-5-(malonyl)glucoside; Cyanidin 3-caffeoyl(sinapoyl)rutinoside-5-glucoside; Cyanidin 3-(malonyl)glucoside(p-hydroxybenzoyl)arabinoside-5-(malonyl)glucoside; Cyanidin 3-malonyl(glucoside)-p-hydroxybenzoyl(feruloyl)glucoside-5-(malonyl)glucoside; Cyanidin 3-malonyl(glucoside)-p-hydroxybenzoyl(p-coumaroyl)arabinoside-5-(malonyl)glucoside; Cyanidin 3-dihydroxysinapoyl(malonyl)glucoside-5-(malonyl)glucoside; Cyanidin 3-hydroxysinapoyl(malonyl)glucoside-5-(malonyl)glucoside; Cyanidin 3-sinapoyl(glucoside)diglucoside-5-(malonyl)glucoside; Cyanidin 3-(sinapoyl)diglucoside-5-(malonyl)glucoside; Cyanidin 3-(sinapoyl)diglucoside-5-glucoside; Epicatechin; Kaempferol; Petunidin 3,5-diglucoside; Quercetin; Rutin (60); Cyanidin 3-diglucoside-5-glucoside; Cyanidin 3-(caffeoyl)(p-coumaroyl)diglucoside-5-glucoside; Cyanidin 3-(feruloyl)(sinapoyl)diglucoside-5-glucoside; Cyanidin 3-(glycopyranosyl-</p> |

|                                                                                                      |                                                                                                                                                                                                                                                                                                                                                                                                                                                                                                                                                                                                                                                                                                                                                                                                                                                                                                                                                                                                                                                                                                                                                                                                                                                                                                                  |
|------------------------------------------------------------------------------------------------------|------------------------------------------------------------------------------------------------------------------------------------------------------------------------------------------------------------------------------------------------------------------------------------------------------------------------------------------------------------------------------------------------------------------------------------------------------------------------------------------------------------------------------------------------------------------------------------------------------------------------------------------------------------------------------------------------------------------------------------------------------------------------------------------------------------------------------------------------------------------------------------------------------------------------------------------------------------------------------------------------------------------------------------------------------------------------------------------------------------------------------------------------------------------------------------------------------------------------------------------------------------------------------------------------------------------|
|                                                                                                      | <p>sinapoyl)diglucoside-5-glucoside; Cyanidin 3-(p-coumaroyl)(sinapoyl)diglucoside-5-glucoside; Cyanidin 3-(p-coumaroyl)(sinapoyl)triglucoside-5-glucoside; Cyanidin 3-(sinapoyl)diglucoside-5-glucoside; Cyanidin 3-(sinapoyl)(sinapoyl)diglucoside-5-glucoside (61); Cyanidin-3-O-(6''-O-p-coumaroyl) sophoroside-7-O-glucoside; Genistein-7-O-galactoside; Kaempferol-3-O-sophorotrioside-7-O-glucoside; Luteolin-6-C-glucoside-7-O-glucoside; Luteolin-6,8-di-C-glucoside; Naringenin-7-O-glucoside (Prunin) (62); Cyanidin-3-(6-caffeoyl)-glucoside; Cyanidin-3-O-galactoside; Cyanidin-3-O-sambubioside; Cyanidin-3-O-sambubioside-5-O-glucoside; Cyanidin-3-O-sophoroside; Cyanidin-3-O-xyloside; Delphinidin-3-O-galactoside; Delphinidin-3-O-glucoside; Delphinidin-3-O-sophoroside; Malvidin-3-O-(6-O-malonyl-beta-D-glucoside); Naringenin-7-O-glucoside; Pelargonidin-3,5-O-diglucoside; Pelargonidin-3,5,3'-O-triglucoside; Peonidin-3,5-O-diglucoside; Peonidin-3,5,3'-O-triglucoside; Peonidin-3-O-glucoside; Petunidin-3-O-galactoside; Petunidin-3-O-glucoside; Petunidin-3-O-sambubioside; Petunidin-3-O-(6-O-malonyl-beta-D-glucoside)(63)</p>                                                                                                                                                |
| <p>Brassicaceae<br/><b><i>Brassica rapa var. pekinensis</i></b> L.<br/>Chinese cabbage / Pe-tsaï</p> | <p>Caffeic acid; Catechin; Chlorogenic acid; t-cinnamic acid; m-Coumaric acid; p-Coumaric acid; Ferulic acid; Formononetin; Gallic acid; Gentisic acid; Hesperidin; p-hydroxy-benzoic acid; Hydroxy-cinnamic acid; Kaempferol; Myricetin; Naringenin; Naringin; Protocatechuic acid; Quercetin; Rutin; Syringic acid; Vanillin (64); Cyanidin 3-caffeoylsophoroside-5-succinoylglucoside; Cyanidin 3-caffeoylsophoroside-5-succinoylglucoside; Cyanidin 3-feruloylhydroxyferuloylsophoroside-5-succinoylglucoside; Cyanidin 3-feruloylsinapoylsophoroside-5-malonylglucoside; Cyanidin 3-feruloylsophoroside-5-glucoside; Cyanidin 3-feruloylsophoroside-5-malonylglucoside; Cyanidin 3-p-coumaroylsophoroside-5-malonylglucoside; Cyanidin 3-O-(6''-malonyl-glucoside); Cyanidin 3-O-arabinoside; Cyanidin 3-O-rutinoside; Cyanidin 3-O-xyloside; Cyanidin 3-sophoroside-5-glucoside; Cyanidin 3-sophoroside-5-malonylglucoside; Pelargonidin 3,5-diglucoside; Pelargonidin 3-O-galactoside; Pelargonidin 3-O-glucoside; Pelargonidin 3-O-rutinoside; Pelargonidin 3-O-rutinoside betaine; Pelargonidin 3-O-sophoroside; Petunidin 3,5-O-diglucoside; Petunidin 3-gentiobioside; Petunidin 3-gentiotrioside; Petunidin 3-O-rutinoside; Petunidin-3-O-rutinoside-(caffeoyl)-5-O-glucoside; Sinapic acid (65)</p> |
| <p>Brassicaceae<br/><b><i>Diplotaxis tenuifolia</i></b> (L.) DC.<br/>Wild rocket</p>                 | <p>Isorhamnetin 3,4'-diglucoside; Kaempferol 3,4'-diglucoside; Quercetin 3-(2-Cafeoyl-Glucose)-3'-(6-Sinapoyl-Glucoside)-4'-Glucoside; Quercetin 3-(2-Feruloyl-Glucose)-3'-(6-Feruloyl-Glucoside)-4'-Glucoside; Quercetin 3-(2-Methylcaffeoyl-Glucose)-3'-(6-Sinapoyl-Glucoside)-4'-Glucoside; Quercetin 3-(2-Sinapoyl-Glucoside)-3'-(6-Sinapoyl-Glucoside)-4'-Glucoside; Quercetin 3,3',4-triglucoside; Quercetin 3,4'-diglucoside-3'-(6-Caffeoyl-Glucoside); Quercetin 3,4'-diglucoside-3'-(6-Feruloyl-Glucoside); Quercetin 3,4'-diglucoside-3'-(6-Methylcaffeoyl-Glucoside); Quercetin 3,4'-diglucoside-3'-(6-p-Coumaroyl-Glucoside) (66); Isorhamnetin-3-glucoside; Kaempferol-3-diglucoside-7-glucoside; Kaempferol-3-glucoside; Kaempferol-3-(2sinapoyl' glucoside)-4 glucoside; Quercetin-3-glucoside (67); Chlorogenic acid; Cyanidin; Luteolin; Rutin; Tamarixetin (42)</p>                                                                                                                                                                                                                                                                                                                                                                                                                            |
|                                                                                                      | <p>Quercetin 3,3',4'-tri-O-β-d-glucopyranoside; Quercetin 3-(2-sinapoyl-O-β-d-glucopyranosyl)-3'-(6-sinapoyl-O-β-d-glucopyranosyl)-4'-O-β-d-</p>                                                                                                                                                                                                                                                                                                                                                                                                                                                                                                                                                                                                                                                                                                                                                                                                                                                                                                                                                                                                                                                                                                                                                                 |

|                                                                                            |                                                                                                                                                                                                                                                                                                                                                                                                                                                                                                                                                                                                                                                                                                                                                                                                                                                                                                                                                                                                                                                                                                                                                                                                                                                                                                                                                                                                                                                                                                                                                                                                                                                                                                                                                                                                                                                                                                                                                                                                                                                                                                                                                                                                                                                                                                                                                                                                                                                                                                                                                                                                                                                       |
|--------------------------------------------------------------------------------------------|-------------------------------------------------------------------------------------------------------------------------------------------------------------------------------------------------------------------------------------------------------------------------------------------------------------------------------------------------------------------------------------------------------------------------------------------------------------------------------------------------------------------------------------------------------------------------------------------------------------------------------------------------------------------------------------------------------------------------------------------------------------------------------------------------------------------------------------------------------------------------------------------------------------------------------------------------------------------------------------------------------------------------------------------------------------------------------------------------------------------------------------------------------------------------------------------------------------------------------------------------------------------------------------------------------------------------------------------------------------------------------------------------------------------------------------------------------------------------------------------------------------------------------------------------------------------------------------------------------------------------------------------------------------------------------------------------------------------------------------------------------------------------------------------------------------------------------------------------------------------------------------------------------------------------------------------------------------------------------------------------------------------------------------------------------------------------------------------------------------------------------------------------------------------------------------------------------------------------------------------------------------------------------------------------------------------------------------------------------------------------------------------------------------------------------------------------------------------------------------------------------------------------------------------------------------------------------------------------------------------------------------------------------|
| <p>Brassicaceae</p> <p><b><i>Eruca sativa</i></b> Mill.</p> <p>Rocket salad</p>            | <p>glucopyranoside; Quercetin 3'-(6-sinapoyl-O-β-d-glucopyranosyl)-3,4'-di-O-β-d-glucopyranoside (68); Kaempferol di-O-glycoside; Kaempferol tri-O-glycoside; Quercetin di-O-glycoside; Quercetin tri-O-glycoside (69); Kaempferol 3,4'-O-diglucopyranoside; Kaempferol 3-O-(2''-O-malonyl-β-D-glucopyranoside)-4'-O-β-D-glucopyranoside; Kaempferol 3-O-glucopyranoside; Kaempferol 4'-O-glucopyranoside (70); Coumaric acid; Ferulic acid; Myricetin; Quercetin; Rutin (71); Catechol; Resorcinol; Vanillin (72); Isorhamnetin-3,4'-diglucoside; Isorhamnetin-3-glucoside; Kaempferol-3-(2-sinapoyl-glucoside)-4'-glucoside; Kaempferol-3,4'-diglucoside; Kaempferol-3-diglucoside-7-glucoside; Kaempferol-3-glucoside; Quercetin-3,4'-diglucoside-3'-(6-caffeoyl-glucoside); Quercetin-3-glucoside (67); Kaempferol 3-sinapoyl-triglucoside-7-glucoside (73); 3,4',5,6,8-Pentamethoxyflavone; 4-(3-Hydroxy-7-phenyl-6-heptenyl)-1,2-benzenediol; Afzelechin; Artomunoxanthentrione epoxide; Fraxidin; Kaempferol 3-O-β-d-galactoside; Sciadopitysin (74); Apigenin glucoside; Gentisic acid glucoside; Gingerol; Isorhamnetin-3,4'-diglucoside; Quercetin-3-(2-feruloyl-glucoside)-3'-(6-sinapoyl-glucoside)-4'-glucoside; Sinapic acid glucoside(75)</p>                                                                                                                                                                                                                                                                                                                                                                                                                                                                                                                                                                                                                                                                                                                                                                                                                                                                                                                                                                                                                                                                                                                                                                                                                                                                                                                                                                                          |
| <p>Brassicaceae</p> <p><b><i>Nasturtium officinale</i></b> W.T.Aiton</p> <p>Watercress</p> | <p>Apigenin; Caffeoylmalic acid; Caftaric acid; p-Coumaric acid; Ferulic acid derivative; Gallic acid derivative; p-Hydroxybenzoic acid; Kaempferol-3-(caffeoyldiglucoside)-7-rhamnoside; Quercetin-3-(caffeoyldiglucoside)-7-glucoside; Proanthocyanidin B1; Sinapic acid (76); 2'-Hydroxy-5-methoxygenistein-4',7-O-diglucoside; 2'-Hydroxy-5-methoxygenistein-O-rhamnosyl-glucoside; 3,5,6,7,8,3',4'-Heptamethoxyflavone; 4',5,7-Trihydroxy-3',6-dimethoxyflavone (Jaceosidin); 6-C-Methyl kaempferol-3-glucoside; 6-C-Methylquercetin-3-O-rutinoside; 6-Hydroxykaempferol-3,6-O-diglucoside; 6-Hydroxykaempferol-3,7,6-O-triglucoside; 6-Hydroxykaempferol-7,6-O-diglucoside; 6-Methoxykaempferol-3-O-glucoside; 8-Methoxykaempferol-7-O-rhamnoside; Apigenin-6-C-(2''-glucosyl) arabinoside; Apigenin-6-C-(2''-xylosyl) glucoside; Apigenin-6-C-glucoside-7-O-(6''-sinapoyl) glucoside; Apigenin-7-O-glucuronide; Apigenin-8-C-glucoside-7-O-sophoroside; Chrysoeriol-7-O-glucoside; Chrysoeriol-7-O-(6''-malonyl) glucoside; Cyanidin-3-O-glucoside (Kuromanin); Cyanidin-3-O-(2''-O-glucosyl) glucoside; Cyanidin-3-O-(6''-O-feruloyl) sophoroside-5-O-glucoside; Cyanidin-3-O-(6''-O-sinapoyl) sophoroside-5-O-glucoside; Cyanidin-3-O-sophoroside-5-O-glucoside; Delphinidin-3,5,3'-tri-O-glucoside; Delphinidin-3-O-glucoside (Mirtillin); Dihydroflavone; Dihydroquercetin (Taxifolin); Hesperetin-5-O-glucoside; Isorhamnetin (3,5,7,4'-tetrahydroxyflavone); Isorhamnetin-3,7-O-diglucoside; Isorhamnetin-3-O-(6''-acetyl) glucoside; Isorhamnetin-3-O-(6''-malonyl) glucoside; Isorhamnetin-3-O-(6''-malonylglucoside)-7-O-glucoside; Isorhamnetin-7-O-glucoside; Isohyperoside; Isosaponarin (Isovitexin-4'-O-glucoside); Kaempferide (3,5,7-trihydroxy-4'-methoxyflavone); Kaempferol (3,5,7,4'-tetrahydroxyflavone); Kaempferol-3-O-(2''-acetyl) glucoside; Kaempferol-3-O-(2''-galloyl) glucoside; Kaempferol-3-O-(6''-acetyl) glucoside; Kaempferol-3-O-(6''-malonyl) galactoside; Kaempferol-3-O-(6''-malonyl) glucoside; Kaempferol-3-O-(6''-p-coumaroyl) glucoside (Tiliroside); Kaempferol-3-O-(2''-caffeoyl) glucosyl-(1→2)-(6''-malonyl) glucoside; Kaempferol-3-O-(2''-sinapoyl) glucosyl-(1→2)-(6''-acetyl) glucoside; Kaempferol-3-O-(2''-sinapoyl) glucosyl-(1→2)-(6''-malonyl) glucoside; Kaempferol-3-O-(2''-feruloyl) glucosyl-(1→2)-(6''-malonyl) glucoside; Kaempferol-3-O-(6'''-malonyl) sophorotrioside; Kaempferol-3-O-(6'''-p-coumaroyl) glucosyl-(1→2)-glucoside-7-O-rhamnoside; Kaempferol-3-O-(6'''-p-coumaroyl) sophoroside-7-O-glucoside; Kaempferol-3-O-(2'''-p-coumaroyl) sophoroside-7-O-glucoside;</p> |



Kaempferol-3-O-(2''-caffeoyl) glucosyl-(1→2)-galactoside; Kaempferol-3-O-(6''-Feruloyl) glucosyl-(1→4)-galactoside; Kaempferol-3-O-(6''-Sinapyl) glucosyl-(1→2)-galactoside; Kaempferol-3-O-(6''-p-Coumaroyl) glucosyl-(1→2)-galactoside; Kaempferol-3-O-(2''-sinapoyl) glucosyl-(1→2)-(6''-acetyl) glucoside; Kaempferol-3-O-(2''-sinapoyl) glucosyl-(1→2)-(6''-malonyl) glucoside; Kaempferol-3-O-neohesperidoside; Kaempferol-3-O-sophorotrioside; Kaempferol-3-O-(6''-malonyl) glucoside-7-O-glucoside; Kaempferol-3-O-robinoside-7-O-rhamnoside (Robinin); Kaempferol-3-O-neohesperidoside-7-O-glucoside; Kaempferol-3-O-rutinoside (Nicotiflorin); Kaempferol-3-O-rutinoside-7-O-glucoside; Kaempferol-3-O-sophoroside-7-O-(2''-Feruloyl) glucoside; Kaempferol-3-O-sophoroside-7-O-(2''-Feruloyl) glucoside; Kaempferol-3-O-sophoroside-7-O-(2''-sinapoyl) glucoside; Kaempferol-3-O-(6'''-Caffeoyl) glucosyl-(1→2)-galactoside; Kaempferol-3-O-(6'''-p-Coumaroyl) glucosyl-(1→2)-glucoside-7-O-rhamnoside; Kaempferol-3-O-neohesperidoside-7-O-(2''-feruloyl) glucoside; Luteolin-6-C-glucoside-7-O-(6''-feruloyl) glucoside; Luteolin-6-C-glucoside-7-O-(6''-p-coumaroyl) glucoside; Luteolin-7-O-gentiobioside; Luteolin-7-O-glucoside (Cynaroside); Luteolin-7-O-neohesperidoside (Lonicerin); Luteolin-7-O-neohesperidoside; Luteolin-7-O-rutinoside; Luteolin-8-C-glucoside-7-O-glucoside; Naringenin-4'-O-glucoside; Naringenin-7-O-Neohesperidoside (Naringin); Naringenin-7-O-(6''-malonyl) glucoside; Nobiletin (5,6,7,8,3',4'-Hexamethoxyflavone); Quercetin-3-O- $\alpha$ -L-arabinofuranoside (Avicularin); Quercetin-3-O-galactoside (Hyperin); Quercetin-3-O-galactoside (Hyperoside); Quercetin-3-O-glucoside (Isoquercitrin); Quercetin-3-O-(2''-acetyl) glucuronide; Quercetin-3-O-(6''-acetyl) galactoside; Quercetin-3-O-(6''-acetyl) glucoside; Quercetin-3-O-(6''-malonyl) galactoside; Quercetin-3-O-(6''-malonyl) glucoside; Quercetin-3-O-(6''-sinapoyl) glucoside-7-O-(6''-malonyl) glucoside; Quercetin-3-O-(6''-sinapoyl) glucoside-7-O-rutinoside; Quercetin-3-O-(6''-feruloyl) glucoside-7-O-rutinoside; Quercetin-3-O-(6''-Caffeoyl) sophoroside-7-O-rhamnoside; Quercetin-3-O-(2'''-Caffeoyl) sophoroside; Quercetin-3-O-[2''-O-(6'''-sinapoyl) glucosyl] glucoside; Quercetin-3-O-(2''-Caffeoyl) glucoside-(1→2)-(6''-Malonyl) glucoside; Quercetin-3-O-(4''-O-glucosyl) rhamnoside; Quercetin-3-O-(2''-O-rhamnosyl) galactoside; Quercetin-3-O-(2''-O-arabinosyl) rutinoside; Quercetin-3-O-apiosyl (1→2) galactoside; Quercetin-3-O-gentiotetroside; Quercetin-3-O-neohesperidoside; Quercetin-3-O-rutinoside (Rutin); Quercetin-3-O-xylosyl (1→2) glucosyl (1→2) glucoside; Quercetin-3-O-xyloside (Reynoutrin); Quercetin-3-O-robinobioside; Quercetin-3-O-sambubioside; Quercetin-3-O-sophoroside (Baimaside); Quercetin-7-O-glucoside; Quercetin-7-O-(2''-malonyl) glucosyl-5-O-glucoside; Rhamnetin; Tamarixetin-3-O-rutinoside; Tricin (5,7,4'-Trihydroxy-3',5'-dimethoxyflavone); Tricin-4'-methylether-3'-O-glucoside; Trifolin (62)

Table S2. Phenolic compounds identified in 10 Underutilized Leaf Vegetables

|                                                                                                              |                                                                                                                                                                                                                                                                                                                                                                                                                                                                                                                                                                                                                                                                                                                                                                                                                                                                                                                                                                                                                                                                                                                                                                                                                                                                                                                                                                                                                                                      |
|--------------------------------------------------------------------------------------------------------------|------------------------------------------------------------------------------------------------------------------------------------------------------------------------------------------------------------------------------------------------------------------------------------------------------------------------------------------------------------------------------------------------------------------------------------------------------------------------------------------------------------------------------------------------------------------------------------------------------------------------------------------------------------------------------------------------------------------------------------------------------------------------------------------------------------------------------------------------------------------------------------------------------------------------------------------------------------------------------------------------------------------------------------------------------------------------------------------------------------------------------------------------------------------------------------------------------------------------------------------------------------------------------------------------------------------------------------------------------------------------------------------------------------------------------------------------------|
| <p>Amaranthaceae</p> <p><b><i>Amaranthus spinosus</i></b> L.</p> <p>Spiny amaranth</p>                       | <p>Caffeoylquinic acid; Coumaroylquinic acid; Feruloylquinic acid; Kaempferol diglycoside; Quercetin 3-O-glucoside; Quercetin diglycoside; Rutin (77) ; Caffeic acid; Catechin; Cinnamic acid; Epicatechin; Ferulic acid; Gallic acid; Kaempferol; Luteolin; Quercetin; Vanillic acid (78); Apigenin; Chlorogenic acid; p-coumaric acid; Ellagic acid; Gentisic acid; p-hydroxybenzoic acid; Myricetin; Naringenin; Naringin; Protocatechuic acid; Salicylic acid; Sinapic acid; Syringic acid (79)</p>                                                                                                                                                                                                                                                                                                                                                                                                                                                                                                                                                                                                                                                                                                                                                                                                                                                                                                                                              |
| <p>Amaranthaceae</p> <p><b><i>Chenopodium album</i></b> L.</p> <p>Goosefoot / Bathua</p>                     | <p>4-hydroxy-3-methoxybenzoic acid (Vanillic acid); 4-hydroxy-cinnamic acid; 4-(hydroxymethyl)-2-methoxyphenol; 4-(1-hydroxyethyl)-2-methoxyphenol; 4-methylbenzaldehyde; Cinnamic acid; Ferulic acid; Lariciresinol; Methyl ferulate; Pinoresinol; Sinapic acid; Syringaresinol; Threo-guaiacylglycerol-<math>\alpha</math>-O-methyl-<math>\beta</math>-O-4-syringaresinol ether; Threo-guaiacylglycerol <math>\beta</math>-O-4-syringaresinol ether; Threo-syringylglycerol-<math>\alpha</math>-O-methyl-<math>\beta</math>-O-4-syringaresinol ether; Vanillyl alcohol (80); Caffeic acid; m-Coumaric acid; Vanillin; Syringic acid (81)</p>                                                                                                                                                                                                                                                                                                                                                                                                                                                                                                                                                                                                                                                                                                                                                                                                       |
| <p>Asteraceae</p> <p><b><i>Gymnanthemum amygdalinum</i></b> (Delile) Sch.Bip.</p> <p>Bitter leaf / Ndole</p> | <p>Luteolin; Luteolin 7-O-B-glucoside; Luteolin 7-O-B-glucuronide (82); 1,5-Dicaffeoylquinic Acid; Apigenin 6-O glucuronide; Apigenin 7-O-glucuronide; Caffeoyl quinic acid; Chlorogenic acid; Flavonoid + caffeoyl deriv.; Luteolin 4'-O-rutinoside; Luteolin 7-O-rutinoside; Rutin (83); 1,3-dicaffeoylquinic acid; 1,3,5-tricaffeoylquinic acid; 1,4-dicaffeoylquinic acid; 1,4,5-tricaffeoylquinic acid; 3,4,5-tricaffeoylquinic acid; 3,4-Dicaffeoylquinic acid (isochlorogenic acid B); 3,5-Dicaffeoylquinic acid (isochlorogenic acid A); 4,5-Dicaffeoylquinic acid (isochlorogenic acid C); Feruloyldicaffeoylquinic acid (84); (-)Epicatechin; Quercetin (85); Apigenin; Apigenin-7-O-glucoside; Apigenin-7-O-rutinoside; Luteolin-4'-O-glucoside (86); Luteolin dihexoside; Luteolin hexoside (87)</p>                                                                                                                                                                                                                                                                                                                                                                                                                                                                                                                                                                                                                                     |
| <p>Convolvulaceae</p> <p><b><i>Ipomea batatas</i></b> L.</p> <p>Sweet potatoes</p>                           | <p>3,4-di-O-caffeoylquinic; 3,4,5-tri-O-caffeoyl quinic acid; 3,5-di-O-caffeoylquinic acid; 4,5-di-O-caffeoylquinic acid; Caffeic acid; Chlorogenic acid (88); Caffeoylated (cyanidin 3-sophoroside-5-glucoside); Caffeoylated (peonidin 3-sophoroside-5-glucoside); Cyanidin 3-(6,6'-caffeoyl-p-hydroxybenzoylsophoroside)-5-glucoside; Cyanidin 3-(6,6'-caffeoylferuloylsophoroside)-5-glucoside; Cyanidin 3-(6,6'-dicaffeoylsophoroside)-5-glucoside; Cyanidin 3-(6-caffeoylsophoroside)-5-glucoside; Feruloylated (cyanidin 3-sophoroside-5-glucoside); Peonidin 3-(6,6'-caffeoyl-p-hydroxybenzoylsophoroside)-5-glucoside; Peonidin 3-(6,6'-caffeoylferuloylsophoroside)-5-glucoside; Peonidin 3-(6,6'-dicaffeoylsophoroside)-5-glucoside; Peonidin 3-sophoroside-5-glucoside; Cyanidin 3-sophoroside-5-glucoside (89); 4,5-feruloylcourmaoylquinic acid; 7,3'-dimethylquercetin; 7-hydroxy-5-methoxycoumarin; Indole-3-carboxaldehyde; cis-N-feruloyltyramine; trans-N-feruloyltyramine; trans-N-(p-coumaroyl) tyramine; Quercetin-3-O-glucopyranosidase; Rhamnetin (90); 1-Caffeoylquinic acid; 3,4,5-Tricaffeoylquinic acid; 7-hydroxycoumarin; Astragaln; Chrysin; Cryptochlorogenic acid; Diosmetin; Esculin; Ethyl caffeate; Hyperoside; Isochlorogenic acid A; Isochlorogenic acid B; Isochlorogenic acid C; Isoquercitrin; Jaceosidin; Kaempferol; Neochlorogenic acid; Pectolarigenin; Protocatechualdehyde; Quercetin; Rutin (91)</p> |
| <p>Cucurbitaceae</p> <p><b><i>Cucurbita moschata</i></b> Duchesne</p> <p>Pumpkin</p>                         | <p>Caffeic acid; Cinnamic acid; p-Coumaric acid; Ferulic acid; Gentisic acid; p-Hydroxybenzoic acid; Protocatechuic acid (92); 1-O-Caffeoylglucose; 1-O-p-Coumaroyl-beta-D-glucose; 2-(E)-O-feruloyl-D-galactaric acid; 2-(E)-O-feruloyl-D-galactaric acid isomer; 2-O-Caffeoylhydroxycitric acid; 2-O-caffeoylglucaric acid; 2-caffeoylisocitric acid; 7-Methylquercetin-3-Galactoside-6"-Rhamnoside-3"-Rhamnoside; Coumaroyl glucaric acid; Diphenol glucuronide; Feruloyl isocitrate; Genistin; Gentisic acid 5-O-glucoside; Isoorientin 2"-O-rhamnoside; Isorhamnetin-3-Galactoside-6"-Rhamnoside; Isorhamnetin-3-O-rutinoside; Kaempferol 7-neohesperidoside; Luteolin 7-neohesperidoside; Pectolarigenin 7-(6"-</p>                                                                                                                                                                                                                                                                                                                                                                                                                                                                                                                                                                                                                                                                                                                            |

|                                                                                                                  |                                                                                                                                                                                                                                                                                                                                                                                                                                                                                                                                                                                                                                                                                                                                                                                                                                                                                                                                                                                                                                                                                                                                                                                                                                                                                                                                                                                                                                                                                                                                                                                                                                                                                                                                                                                                                                                                                                                                                         |
|------------------------------------------------------------------------------------------------------------------|---------------------------------------------------------------------------------------------------------------------------------------------------------------------------------------------------------------------------------------------------------------------------------------------------------------------------------------------------------------------------------------------------------------------------------------------------------------------------------------------------------------------------------------------------------------------------------------------------------------------------------------------------------------------------------------------------------------------------------------------------------------------------------------------------------------------------------------------------------------------------------------------------------------------------------------------------------------------------------------------------------------------------------------------------------------------------------------------------------------------------------------------------------------------------------------------------------------------------------------------------------------------------------------------------------------------------------------------------------------------------------------------------------------------------------------------------------------------------------------------------------------------------------------------------------------------------------------------------------------------------------------------------------------------------------------------------------------------------------------------------------------------------------------------------------------------------------------------------------------------------------------------------------------------------------------------------------|
|                                                                                                                  | <p>methylglucuronide); Pseudolaroside A; Quercetin 3-galactoside 7-rhamnoside; Quercitrin; Rutin (93); Ellagic acid; Gallic acid; Syringic acid; Vanillic acid (94)</p>                                                                                                                                                                                                                                                                                                                                                                                                                                                                                                                                                                                                                                                                                                                                                                                                                                                                                                                                                                                                                                                                                                                                                                                                                                                                                                                                                                                                                                                                                                                                                                                                                                                                                                                                                                                 |
| <p>Euphorbiaceae</p> <p><b><i>Manihot esculenta</i></b> Crantz</p> <p>Manioc / Cassava / Yuca</p>                | <p>Kaempferol 3-O-rutinoside; Kaempferol triglycoside; Quercetin triglycoside (95); Clovin; Hyperoside; Myricetin-3-O-Rutinoside; Nicotiflorin; Narcissin; Robinin (96); Benzoic acid; Gallic acid; Genistic acid; Hydroxybenzoic acid; Protocatechuic acid; Salicylic acid; Syringic acid; Vanillic acid (97); Quinones (98); Catechin; Rutin; Quercetin; Resveratrol; Tannic acid (99); Apigenin; Kaempferol (100)</p>                                                                                                                                                                                                                                                                                                                                                                                                                                                                                                                                                                                                                                                                                                                                                                                                                                                                                                                                                                                                                                                                                                                                                                                                                                                                                                                                                                                                                                                                                                                                |
| <p>Lamiaceae</p> <p><b><i>Ocimum gratissimum</i></b> L.</p> <p>African basil / Wild basil</p>                    | <p>Apigenin 7-O-glucoside; Apigenin 7-O-malonylglucoside; Cirsimaritin; Isothymusin; Isovitene; Kaempferol 3-O-neohesperidoside; Kaempferol 3-O-rutinoside; Luteolin 5-O-glucoside; Luteolin 7-O-glucoside; Quercetin 3-O-glucoside; Rosmarinic acid; Rutin; Vitexin (101); Apigenin; Apigenin 7,4,'-dimethyl ether; Hymenoxin; Luteolin; Methyl eugenol; Nepetoidin A; Nevadensin; Salvigenin; Sinapic acid (102); Epicatechin; Quercitrin (103); Caffeic acid; Catechin; Chlorogenic acid; p-Coumaric acid; Ellagic acid; Ferulic acid; Gallic acid; Gentsic acid; p-hydroxybenzoic acid; Kaempferol; Myricetin; Naringenin; Naringin; Protocatechuic acid; Quercetin; Salicylic acid; Syringic acid; Vanillic acid (104)</p>                                                                                                                                                                                                                                                                                                                                                                                                                                                                                                                                                                                                                                                                                                                                                                                                                                                                                                                                                                                                                                                                                                                                                                                                                         |
| <p>Malvaceae</p> <p><b><i>Corchorus olitorius</i></b> L.</p> <p>Jute mallow / Nalita jute</p>                    | <p>Quercetin 3-(6-malonylgalactoside) (105); Catechin (106); 1,3-di-O-caffeoylquinic acid; 3,4-di-O-caffeoylquinic acid; 4,5-di-O-caffeoylquinic acid; 4-O-caffeoylquinic acid (cryptochlorogenic acid); Apigenin; Apigenin-7-O-glucoside; Caffeic acid; Cirsiliol; p-coumaric acid; trans-Ferulic acid; Gallic acid; Kaempferol; Luteolin; Naringenin; Naringin; Protocatechuic acid; Quercetin; Quercetrin (quercetin-3-O rhamnoside); Quinic acid; Rosmarinic acid (107); Cinnamic acid; Ellagic acid; Iso-ferulic acid; Myricetin (108); 3,5-Dicaffeoylquinic acid (isochlorogenic acid A); Astragaln; Quercetin 3-(6-malonylglucoside); Neochlorogenic acid (109); Cynarin; Fisetin; Biochanin A; Diosgenin; Quercimeritrin (Quercetin-7-glucoside); Hyperoside (Quercetin-3-galactoside); Isoquercitrin (Quercetin-3-glucoside); Kaempferol-3-glucoside; 4-Hydroxybenzoic acid; 4-Hydroxybenzaldehyde; Chlorogenic acid (110)</p>                                                                                                                                                                                                                                                                                                                                                                                                                                                                                                                                                                                                                                                                                                                                                                                                                                                                                                                                                                                                                 |
| <p>Moringaceae</p> <p><b><i>Moringa oleifera</i></b> Lam.</p> <p>Moringa / Drumstick tree / Horseradish tree</p> | <p>3-O-2",3"-diacetylglucoside; Benzoic acid 4-O-a-rhamnosyl-(1→2)-b-glucoside; Benzoic acid 4-O-b-glucoside; Benzaldehyde 4-O-b-glucoside; Kaempferide; Kaempferide 3-O-(2"-O-galloylrhamnoside; Kaempferide 3-O-(2"-O-galloylrutinoside)-7-O-a-rhamnoside; Kaempferol-3-O-[B-glucosyl-(1→2)]-[a-rhamnosyl-(1→6)-O-B-glucoside-7-O-a-rhamnoside; Kaempferol-3-O-[a-rhamnosyl-(1→2)]-[a-rhamnosyl-(1→4)-O-b-glucoside-7-O-a-rhamnoside(111); 3-Caffeoylquinic acid (chlorogenic acid); 5-Caffeoylquinic acid (neochlorogenic acid); Isorhamnetin; Isorhamnetin 3-O-(X"-malonylglucoside); Kaempferol 3-O-glucoside; Kaempferol 3-O-(6"-malonylglucoside); Kaempferol 3-O-(X"-acetylglucoside); Kaempferol 3-O-(X"-malonylglucoside); Kaempferol 3-O-rutinoside; Mixture: quercetin 3-O-(X"-malonylglucoside) and isorhamnetin 3-O-glucoside; Quercetin 3-O-glucoside; Quercetin 3-O-(6"-malonylglucoside); Quercetin 3-O-(X"-acetylglucoside); Quercetin 3-O-rutinoside; Quercetin 3-O-(Y"-malonylglucoside) (112); Ferulic acid; Vanillin (113); Astragaln; Cryptochlorogenic acid (114); Apigenin C-dihexose; Isorhamnetin acetyl hexose; Isorhamnetin hexose; Isorhamnetin hydroxy-methylglutarate; Kaempferol acetyl dihexose; Kaempferol acetyl hexose (vicenin-2); Kaempferol hexose; Kaempferol hydroxy-methyl hexose; Kaempferol malonyl hexose; Quercetin acetyl dihexose; Quercetin acetyl hexose; Quercetin hexose; Quercetin hydroxymethylglutaryl hexose; Quercetin malonyl hexose (115); Biflavonyl; Kayaflavone (116); Biochanin A; o-Coumaric acid; Myricetin; Naringenin; Naringin (117); Caffeic acid; Catechin; Ellagic acid; Epicatechin; Gallic acid; Isoquercitrin; Kaempferol; Quercetin; Quercitrin; Rutin (118); 3-OH-tyrosol; Biochanin A; Catechol; Cinnamic acid; α-Coumaric acid; p-Coumaric acid; Ethyl vanillin; Iso-ferulic acid; Protocatechuic acid; Pyrogallol; Resveratrol; Salicylic acid; Vanillic acid (119)</p> |

|                                                                       |                                                                                                                                                                                                                                                                                                                                                                                                                                                                                                                                                                                                                                                                                                                                                                                                                                                                                                                                                                                                                                                                                                                                                                                                                                                                                                                                                                                                                                                                                                                                                                                                                                                           |
|-----------------------------------------------------------------------|-----------------------------------------------------------------------------------------------------------------------------------------------------------------------------------------------------------------------------------------------------------------------------------------------------------------------------------------------------------------------------------------------------------------------------------------------------------------------------------------------------------------------------------------------------------------------------------------------------------------------------------------------------------------------------------------------------------------------------------------------------------------------------------------------------------------------------------------------------------------------------------------------------------------------------------------------------------------------------------------------------------------------------------------------------------------------------------------------------------------------------------------------------------------------------------------------------------------------------------------------------------------------------------------------------------------------------------------------------------------------------------------------------------------------------------------------------------------------------------------------------------------------------------------------------------------------------------------------------------------------------------------------------------|
| <p>Urticaceae</p> <p><b><i>Urtica dioica</i></b> L.</p> <p>Nettle</p> | <p>Apigenin; Apigenin hexoside; Caffeic acid; Catechin; Cinnamic acid; p-Coumaric acid; Epicatechin; Epicatechin gallate; Epigallocatechin gallate; Esculetin; Ferulic acid; Gallic acid; Genistein; Gentisic acid; p-Hydroxybenzoic acid; Isorhamnetin; Isorhamnetin rutinoside; Kaempferol; Kaempferol hexoside; Kaempferol pentoside; Kaempferol pentosylhexoside; Kaempferol rhamnoside; Kaempferol-3-rutinoside; Luteolin; Myricetin; Naringenin; Protocatechuic acid; Quercetin; Quercetin-3-glucoside; Quercetin-3-rutinoside; Quercetin acetylhexoside; Quercetin acetylrutinoside; Quercetin pentoside; Quercetin pentosylhexoside; Quercetin rhamnoside; Quinic acid; Scopoletin; Sinapic acid; Syringic acid; Umbelliferone (7-hydroxycoumarin) (120); 2-Caffeoylisocitric acid; 2-Caffeoylisocitric acid cyclodimer; 7'-Hydroxylariciresinol-7'-O-hexoside; Apigenin 2''-O-deoxyhexosil-6''-(3-hydroxy-3-methylglutaroyl)-6-C-hexoside; Apigenin 6,8-diC-hexoside; Apigenin O-deoxyhexosil-C-hexoside; Caffeoyl-methylisocitric acid; p-Coumaric acid hexoside; p-Coumaroylisocitric acid; Diosmetin O-deoxyhexosil-C-hexoside; Dihydroxybenzoic acid hexoside 1; Dihydroxybenzoic acid hexoside 2; Esculin; Luteolin 6-C-hexoside; Luteolin O-deoxyhexosil-C-hexoside; Luteolin 2''-O-deoxyhexosil-6''-(3-hydroxy-3-methylglutaroyl)-6-C-hexoside; Methylluteolin 2''-O-deoxyhexosil-6''-(3-hydroxy-3-methylglutaroyl)-6-C-hexoside; Methylluteolin 6''-(3-hydroxy-3-methylglutaroyl)-6-C-hexoside (121); 5-O-caffeoylquinic acid (Neochlorogenic acid); Caffeoylmalic Acid; Cichoric Acid; Quercetin 3-O-galactoside (Hyperoside) (122)</p> |
|-----------------------------------------------------------------------|-----------------------------------------------------------------------------------------------------------------------------------------------------------------------------------------------------------------------------------------------------------------------------------------------------------------------------------------------------------------------------------------------------------------------------------------------------------------------------------------------------------------------------------------------------------------------------------------------------------------------------------------------------------------------------------------------------------------------------------------------------------------------------------------------------------------------------------------------------------------------------------------------------------------------------------------------------------------------------------------------------------------------------------------------------------------------------------------------------------------------------------------------------------------------------------------------------------------------------------------------------------------------------------------------------------------------------------------------------------------------------------------------------------------------------------------------------------------------------------------------------------------------------------------------------------------------------------------------------------------------------------------------------------|

Table S3. Phenolic compounds identified in 15 Leafy Spices

\*compounds identified in leaves and stems

|                                                                          |                                                                                                                                                                                                                                                                                                                                                                                                                                                                                                                                                                                                                                                                                                                                                                                                                                                                                                                                                                                                                                                                                                                                                                                                                                                                                                                                                                                                                                                                                                                                                                                                                                                                                                                                                                                                                                                                                                                                                                                                                                                                                                                                                                                                                                            |
|--------------------------------------------------------------------------|--------------------------------------------------------------------------------------------------------------------------------------------------------------------------------------------------------------------------------------------------------------------------------------------------------------------------------------------------------------------------------------------------------------------------------------------------------------------------------------------------------------------------------------------------------------------------------------------------------------------------------------------------------------------------------------------------------------------------------------------------------------------------------------------------------------------------------------------------------------------------------------------------------------------------------------------------------------------------------------------------------------------------------------------------------------------------------------------------------------------------------------------------------------------------------------------------------------------------------------------------------------------------------------------------------------------------------------------------------------------------------------------------------------------------------------------------------------------------------------------------------------------------------------------------------------------------------------------------------------------------------------------------------------------------------------------------------------------------------------------------------------------------------------------------------------------------------------------------------------------------------------------------------------------------------------------------------------------------------------------------------------------------------------------------------------------------------------------------------------------------------------------------------------------------------------------------------------------------------------------|
| <p>Amaryllidaceae</p> <p><b>Allium ursinum</b> L.</p> <p>Ramsons</p>     | <p>4'-O-acetyl-kaempferol-3-O-<math>\alpha</math>-l-rhamnopyranosyl-(1<math>\rightarrow</math>2)-<math>\beta</math>-d-glucopyranoside-7-O-[2-O-(trans-p-coumaroyl)]-<math>\beta</math>-d-glucopyranoside; 7-O-<math>\beta</math>-d-glucopyranosyl-kaempferol-3-O-<math>\alpha</math>-l-rhamnopyranosyl-(1<math>\rightarrow</math>2)-<math>\beta</math>-d-glucopyranoside; acetyl-kaempferol-deoxyhexose hexoside-7-O-[2-O-(feruloyl)]-hexoside; acetyl-kaempferol-deoxyhexose hexoside(p-coumaroyl)]-hexoside derivative; acetyl-kaempferol-deoxyhexose hexoside-7-O-[2-O-(p-coumaroyl)]-hexoside; Kaempferol 3-O-<math>\alpha</math>-L-rhamnopyranosyl-(1<math>\rightarrow</math>2)-[3-O-acetyl]-<math>\beta</math>-d-glucopyranoside; Kaempferol 3-O-<math>\alpha</math>-L-rhamnopyranosyl-(1<math>\rightarrow</math>2)-<math>\beta</math>-d-glucopyranoside; Kaempferol3-O-<math>\alpha</math>-L-rhamnopyranosyl-(1<math>\rightarrow</math>2)-<math>\beta</math>-d-glucopyranoside-7-(2''-p-coumarylglucoside); Kaempferol3-O-<math>\alpha</math>-L-rhamnopyranosyl-(1<math>\rightarrow</math>2)-<math>\beta</math>-d-glucopyranoside-7-(2''-p-coumaroyl-3-O-<math>\beta</math>-d-glucopyranosyl-d-glucose); Kaempferol3-O-<math>\alpha</math>-L-rhamnopyranosyl-(1<math>\rightarrow</math>2)-[6-O-acetyl]-<math>\beta</math>-d-glucopyranoside; Kaempferol-3-O-<math>\alpha</math>-l-rhamnopyranosyl-(1<math>\rightarrow</math>2)-<math>\beta</math>-d-glucopyranoside; Kaempferol 3-O-rhamnopyranosyl-(1<math>\rightarrow</math>2)-glucopyranosyl; Kaempferol-deoxyhexose-hexoside-feruloyl-hexoside; Kaempferol-deoxyhexose-(1<math>\rightarrow</math>2)-hexoside-(p-coumaryl-hexoside-hexoside); Kaempferol-hexose-(acetyl-deoxyhexose (p-coumaryl-hexosyl-hexoside)) derivative; Kaempferol-hexosyl-acetyl-deoxyhexose-hexoside derivative; Kaempferol-(acetyl-p-coumaryl-hexose); Kaempferol-(acetylhexoside)-hexoside; Kaempferol-3,7-di-O-<math>\beta</math>-d-glucopyranoside; Kaempferol-pentoside; Kaempferol-pentosylhexoside; Kaempferol-rhamnoside; Kaempferol-3-rutinoside (123) Protocatechuic acid; 4-OH-benzoic acid; Vanillic acid; Caffeic acid; Syringic acid; Coumaric acid; Ferulic acid; Sinapic acid (124)</p> |
| <p>Amaryllidaceae</p> <p><b>Allium schoenoprasum</b> L.</p> <p>Chive</p> | <p>Astragalin (kaempferol-3-O-glucoside); Flavonol diglucoside; Flavonol triglucoside; Isorhamnetin 3-<math>\beta</math>-D-glucoside; Quercetin 3-<math>\beta</math>-D-glucoside (125); Kaempferol; Catechin; p-Coumaric acid; Ferulic acid (126); Apigenin; Caffeic acid; Chlorogenic acid; Dihydroquercetin; Gallic acid; Hesperetin; Hyperoside; Isorhamnetin; Luteolin; Naringenin Chalcone; p-Hydroxybenzoic acid; Quercetin; Rutin; Sinapic acid; trans-Cinnamic acid; Vanillic acid (127)</p>                                                                                                                                                                                                                                                                                                                                                                                                                                                                                                                                                                                                                                                                                                                                                                                                                                                                                                                                                                                                                                                                                                                                                                                                                                                                                                                                                                                                                                                                                                                                                                                                                                                                                                                                       |
| <p>Apiaceae</p> <p><b>Anethum graveolens</b> L.</p> <p>Indian dill</p>   | <p>Isorhamnetin-3-O-<math>\beta</math>-D-glucuronide; Isorhamnetin-3-O-galactoside; Isorhamnetin-3-O-glucoside; Isorhamnetin-3-O-rhamnoglucoside; Quercetin-3-O-<math>\alpha</math>-D-galactoside (Hyperoside); Quercetin-3-O-<math>\beta</math>-D-glucoside (Isoquercitrin); Quercetin-3-O-<math>\beta</math>-D-glucuronide; Quercetin-3-O-rutinoside (Rutin) (128); Caffeic acid; Carvacrol; Chlorogenic acid; o-Coumaric acid; p-Coumaric acid; trans-Cinnamic acid; Eugenol; Ferulic acid; Protocatechuic acid; Rosmarinic acid; Syringic acid; Thymol; Vanillic acid (129); 5-O-caffeoylquinic acid (neochlorogenic acid); 4-O-caffeoylquinic acid (cryptochlorogenic acid); Feruloylquinic acid; Kaempferol-3-O-glucuronide; Protocatechuic derivative of ferulic acid (130)</p>                                                                                                                                                                                                                                                                                                                                                                                                                                                                                                                                                                                                                                                                                                                                                                                                                                                                                                                                                                                                                                                                                                                                                                                                                                                                                                                                                                                                                                                     |
| <p>Apiaceae</p> <p><b>Coriandrum sativum</b> L.</p> <p>Coriander</p>     | <p>4-Hydroxycoumarin; Apigenin; Arbutin; Caffeic acid; Catechin; Chrysoeriol; Diosmin; Dihydroquercetin; Dicoumarin; Esculin; Esculetin; Gallic acid; Hesperidin; Hyperoside; Luteolin; Orientin; Quercetin; Rutin; Salicylic acid; Scopoletin; Umbelliferone; Vicenin; Vitexin (131); Acetin; Cis-Ferulic acid; Trans-Ferulic acid (132); 5-O-caffeoylquinic acid (neochlorogenic acid); Acetylated apigenin-C-hexoside-O-pentoside; Acetylated luteolin hexoxyl-rhamnoside; Apigenin-8-C-hexoside-5-O-pentoside; Apigenin-8-C-hexoside-7-O-pentoside; Caffeoylquinic acid; p-coumaroylquinic acid; Dimethoxycinnamoyl hexoside; Ferulic acid glucoside; Isorhamnetin dihexoside; Kaempferol-3-O-rutinoside; Luteolin hexoxyl-rhamnoside; Quercetin 3-O-glucuronide; Quercetin-3-O-glucoside; Quercetin-3-O-rutinoside; Tryptophan hexoside (133)*; Chlorogenic acid; trans-Cinnamic acid; o-Coumaric acid; p-Coumaric acid; trans-Hydroxycinnamic acid; Kaempferol; Naringin; Quercetin dihydrate; Quercetin-3-rhamnoside; Resorcinol; Rosmarinic acid; Rutin trihydrate; Vanillic acid (134)</p>                                                                                                                                                                                                                                                                                                                                                                                                                                                                                                                                                                                                                                                                                                                                                                                                                                                                                                                                                                                                                                                                                                                                        |

|                                                                                           |                                                                                                                                                                                                                                                                                                                                                                                                                                                                                                                                                                                                                                                                                                                                                                                                                                                                                                                                                                                                                                                                                                                                                                                                                                                                                                                                                                                                                                                                                                                                                                                                                                                     |
|-------------------------------------------------------------------------------------------|-----------------------------------------------------------------------------------------------------------------------------------------------------------------------------------------------------------------------------------------------------------------------------------------------------------------------------------------------------------------------------------------------------------------------------------------------------------------------------------------------------------------------------------------------------------------------------------------------------------------------------------------------------------------------------------------------------------------------------------------------------------------------------------------------------------------------------------------------------------------------------------------------------------------------------------------------------------------------------------------------------------------------------------------------------------------------------------------------------------------------------------------------------------------------------------------------------------------------------------------------------------------------------------------------------------------------------------------------------------------------------------------------------------------------------------------------------------------------------------------------------------------------------------------------------------------------------------------------------------------------------------------------------|
| <p>Apiaceae</p> <p><b><i>Petroselinum crispum</i></b> (Mill.)<br/>Fuss</p> <p>Parsley</p> | <p>6''-acetylapiin; Diosmetin; Diosmetin 7-O-β-D-glucopyranoside; Kaempferol 3-O-β-D-glucopyranoside (135); Apiin; Apigenin; Apigetrin (136); Kaempferol (137); Caffeic acid; Chlorogenic acid; p-Coumaric acid; p-Coumaric acid 4-O-hexoside; Isoquercitrin; Protocatechuic acid (126); Apigenin-O-acetyl-pentosyl-hexoside; Chrysoeriol-7-O-malonylapiosylglucoside B; Coumaroyl derivative; Diosmetin 7-aposylglucoside; Quercetin-O-pentosyl-hexoside (138)</p>                                                                                                                                                                                                                                                                                                                                                                                                                                                                                                                                                                                                                                                                                                                                                                                                                                                                                                                                                                                                                                                                                                                                                                                 |
| <p>Asteraceae</p> <p><b><i>Artemisia dracunculus</i></b> L.</p> <p>Tarragon</p>           | <p>2-Hydroxy-4-methoxycinnamic acid; 3,5,4-Trihydroxy-7,3'-dimethoxyflavone; 3,5,4'-trihydroxy-7-methoxyflavone; 3,5-Dicaffeoylquinic acid (isochlorogenic acid A); 4,5-di-O-caffeoylquinic acid; 5,6,7,8,4''-pentahydroxymetoflavone; 5,7-dihydroxyflavone; 5-O-caffeoylquinic acid (neochlorogenic acid); 7-O-B-0-glycopyranoside; 7-O-B-0-glucopyranoside anangenin estragonizide; p-coumaroyl-caffeoylquinic acid; p-coumaroyl-feruloylquinic acid; Hydroxybenzoic acid; Kaempferol (139); Chicory acid; p-Coumaric acid; Ferulic acid; Syringic acid; Vanillic acid (140); 2',4'-Dihydroxy-4-methoxydihydrochalcone; Caffeoyl hexaric acid; Caffeoylquinic acid; Di-O-caffeoylquinic acid; Davidigenin; Ferulic acid hexoside; Isorhamnetin glycosides; Isorhamnetin ramosylhexoside; Isoquercitrin/hiperoside; Patuletin 3-O-malonyrrobinobioside; Patuletin hexoside; Patuletin malonyirhamnosylhexoside; Patuletin rhamnosylhexoside; Protocatechuic acid dihexoside; Quercetin derivative; Quercetin-3-O-rhamnosylhexoside; Sakuranetin; Syringetin 3-O-rhamnosylhexoside; Syringic acid hexoside; Vicenin; Vicenin-2 apigenin 6,8-di-C-glucoside (141); 4-hydroxycoumarin; 7,3'-Dimethyleteriodictyol; 7-Methyleteriodictyol; 7-Methylaringenine; 8-hydroxycapillarin; 8-hydroxyartemidin; Artemidinol; Biocovertsetin; Daphnetin 7-methyl ether; Daphnetin methylene ether; Esculin; Esculetin; Estroside; Kaempferol glycosides; Luteolin glycosides; Quercetin 3-O-rutinoside; Rutoside; Scopoletin (142)</p>                                                                                                                          |
| <p>Lamiaceae</p> <p><b><i>Melissa officinalis</i></b> L.</p> <p>Lemon balm</p>            | <p>Caftaric acid hexoside; Rosmarinic acid hexoside; Sulphated rosmarinic acid (143); Carvacrol; Thymol (144); 3-(3,4-dihydroxyphenyl)-Lactic acid; Apigenin; Apigenin 7-O-β-D-glucopyranoside; Apigenin 7-O-glucoside; Caffeic acid; Catechin; Chlorogenic acid; Ellagic acid; Epicatechin; Eriodictyol-7-O-glucoside; Gallic acid; Hesperetin; Hesperidin; Isoquercitrin; Lithospermic acid A; Luteolin; Luteolin 3'-O-β-D-glucuronopyranoside; Luteolin 7-O-β-D-glucopyranoside-3'-O-β-D-glucuronopyranoside; Luteolin 7-O-β-D-glucuronopyranoside; Luteolin 7-O-glucoside; Luteolin 3'-O-β-D-glucuronopyranoside; m-Coumaric acid; Melitric acid A; Melitric acid B; Naringenin; Naringin; Rosmarinic acid; Rutin; Salvianolic acid A; Salvianolic acid B; Salvianolic acid C; Salvianolic acid F; Sagerinic acid; Yunnaneic acid F (145)*; Daidzein; Neochlorogenic acid(146)*; Caftaric acid; p-Coumaric acid; Ferulic acid; Fisetin; Gentsic acid; Hyperoside; Isoquercetin; Kaempferol; Myricetin; Quercetin; Quercitrin; Sinapic acid (147)</p>                                                                                                                                                                                                                                                                                                                                                                                                                                                                                                                                                                                            |
| <p>Lamiaceae</p> <p><b><i>Mentha spicata</i></b> L.</p> <p>Spearmint</p>                  | <p>3,4-dihydroxybenzoic (Protocatechuic acid); 5,6,4'-Trihydroxy-7,3'-dimethoxyflavone; Apigenin; Catechin; Diosmetin; Diosmin; Diosmin-7-glucoside; Epicatechin; Gallic acid; Luteolin; Myricetin; Naringenin; Syringic acid; Thymonin; Vanillic acid (148); 3'-Caffeoylquinic (chlorogenic acid); 5'-Caffeoylquinic (neochlorogenic acid); Acacetin; Acacetin derivative; Caftaric acid; Caffeic acid; Coumaric acid; Cyclolariciresinol; Danshensu derivative; Dehydro-Rosmarinic acid; Dihydroxyphenylacetic acid; Dihydroxyphenyllactic acid (Danshensu); Dicaffeic acid; Ferulic acid derivative; Feruloylquinic acid; G(8-O-4)5H; Hydroxybenzoic acid; Hydroxyphenyllactic acid; Lithospermic acid; Luteolin-8-C-glucoside (orientin); Luteolin-glucuronide; Luteolin-hexoside; Luteolin-rutinoside; Naringenin-7-O-rutinoside (Narirutin); Protocatechuic acid hexoside; Quercetin-rutinoside (rutin); Rosmanol; Rosmarinic acid; Rosmarinic acid derivative; Rosmarinic acid-dihexoside; Rosmarinic acid-O-caffeic acid; Rosmarinic acid-O-hexoside; Rosmarinic acid-rutinoside; Sagerinic acid; Sagerinic acid isomer; Salicylic acid; Salvianolic acid A; Salvianolic acid A derivative; Salvianolic acid A isomer; Salvianolic acid B; Salvianolic acid B derivative; Salvianolic acid B/E/isomer; Salvianolic acid D; Salvianolic acid E; Salvianolic acid F; Salvianolic acid J/isomer; THDBCHMCA (149); 4-Hydroxycoumarin; Trans-5-O-(4-coumaroyl)-D-quinat; Apigenin-7-O-glucoside; Chrysofenetin; Demethylsulochrin; Eriodictyol; Eriodictyol-7-O-glucoside; Eravacycline; Hesperidin; Kaempferol; Rhamnocitrin; Retusin (150)</p> |

|                                                                                  |                                                                                                                                                                                                                                                                                                                                                                                                                                                                                                                                                                                                                                                                                                                                                                                                                                                                                                                                                                                                                                                                                                                                                                                                                                                                                                                                                                                                                                                                                                                                                                                                                                                                                                                                                                                                                                                                                                                                                                                                                                                                                                                                                                                                       |
|----------------------------------------------------------------------------------|-------------------------------------------------------------------------------------------------------------------------------------------------------------------------------------------------------------------------------------------------------------------------------------------------------------------------------------------------------------------------------------------------------------------------------------------------------------------------------------------------------------------------------------------------------------------------------------------------------------------------------------------------------------------------------------------------------------------------------------------------------------------------------------------------------------------------------------------------------------------------------------------------------------------------------------------------------------------------------------------------------------------------------------------------------------------------------------------------------------------------------------------------------------------------------------------------------------------------------------------------------------------------------------------------------------------------------------------------------------------------------------------------------------------------------------------------------------------------------------------------------------------------------------------------------------------------------------------------------------------------------------------------------------------------------------------------------------------------------------------------------------------------------------------------------------------------------------------------------------------------------------------------------------------------------------------------------------------------------------------------------------------------------------------------------------------------------------------------------------------------------------------------------------------------------------------------------|
| <p>Lamiaceae</p> <p><b><i>Origanum majorana</i> L.</b></p> <p>Sweet marjorum</p> | <p>trans-2-Hydroxycinnamic acid; Amentoflavone; Arbutin; Dihydroxyphenolic acid; Luteolin Coumarin; Quercetin; Rutin; Syringic acid; Vanillic acid (151); Aromadendrin; Sorbifolin; Taxifolin; Thymonin; Thymusin; Trihydroxy-7,3'-dimethoxyflavone (152); Apigenin; Caffeic acid; Caffeoylquinic acid derivative; Carnosic acid; Chlorogenic acid; Cinnamic acid; p-Coumaric acid; Ferulic acid; Ferulic acid derivative; Gallic acid; Luteolin-7-o-rutinoside; Methyl rosmarinat; Naringenin; Quercetin-7-o glucoside; Quinic acid; Rosmarinic acid (153); Catechin; Chrysin; Epicatechin (154); Dihydroquercetin; Dihydroluteolin; Epigallocatechin; Luteolin glucuronide; Luteolin-7-O-glucoside; Gallocatechin derivative; Quercetin arabinoside (155); 3-O-methyl-catechin (mecidanol); Acacetin rutinoside; Apigenin; Apigenin; Apigenin-O-glucuronide; Caffeoyl-arbutin; Caffeoylquinic acid derivative; Carnosic acid; Cinnamic acid; o-Coumaric acid; Diosmin; Dihydrokaempferide; Dihydroquercetin; Dihydroxybenzoic acid; Dihydroxybenzoic acid hexose; Eriodictyol; Gallocatechin isomer 1; Gallocatechin isomer 2; Hesperidin; Isoorientin; Isorhamnetin; Isovitexin; Jaceidin isomer 1; Jaceidin isomer 2; Kaempferol-O-glucuronide; kaempferol-O-sambubioside; Luteolin; Luteolin-6,8-C-dihexose; Luteolin-7-O-rutinoside; Luteolin-O-glycoside; Methyl rosmarinat; Naringnin; Orientin; Quercetin dimethyl ether; Quercetin-7-O-glucoside; Rosmarinic acid; Sakuranetin; Salvianolic acid I; Syringetin; Taxifolin methyl ether isomer 1; Taxifolin methyl ether isomer 2; Vicenin-2 (Apigenin-6,8-di-C-hexoside); Vitexin (156); 2-(4-Hydroxy phenyl) ethanol; Vanillin (157); 5,6,3 Trihydroxy 7,8,4' trimethoxyflavone; Amentoflavone–fistinidin dimer; Amentoflavone–gallocatechin, trimer protonated; Carvacrol; Fisetinidin 4,6 dimer; Fisetinidin–fisetinidin–gallocatechin trimer; Gallocatechin 4,8 dimer; Gallocatechin-catechin 4,8 dimer; Gallocatechin–gallocatechin–catechin trimer protonated; p-Hydroxybenzoic; Kaempferol; Lithospermic acid; Monohydroxy 7,8,4' trimethoxyflavone; Protocatechuic acid; Salicylic acid; Thymol; Tyrosol (158); Blumeatin (159)</p> |
| <p>Lamiaceae</p> <p><b><i>Origanum vulgare</i> L.</b></p> <p>Oregano</p>         | <p>2-caffeoyloxy-3-[2-(4-hydroxybenzyl)- 4,5-dihydroxy]phenylpropionic; Phenyl glucoside(160); Apigenin 7-O-β-D-glucuronide; Apigenin 7-O-β-D-(6''-methyl)glucuronide; Luteolin 7-O-β-D-glucopyranoside; Luteolin 7-O-β-D-xylopyranoside; Orignalnanol; Salvianolic acid A (161)*; 5,3',4'-Trihydroxy-7-methoxyflavone; 5,6-Dihydroxy-7,3',4' -trimethoxyflavone; Aromadendrin; Eriodictyol; Genkwanin; Ladanein; Naringenin; Pebrellin; Sorbifolin; Taxifolin; Thymonin; Thymusin; Trihydroxy-7,3'-dimethoxyflavone (151); Apigenin 6,8-di-C-glucoside; Apigenin 7-O-diglucuronide; Eriodictyol 6,8-di-C-glucoside; Eriodictyol 7-O-glucoside; Luteolin 7,7'-di-O-glucuronide; Luteolin 7-O-glucuronide; Luteolin 7-O-glucuronide-3'-O-glucoside; Carvacrol; Thymol (162)*; Acacetin; Apigenin; Apigenin-7-O-glucoside; Apigenin-7-O-rutinoside; Caffeic acid; Caffeic acid hexoside; Carnosic acid; Carnosol; Cirsimaritin; p-Coumaric acid; Dicafeoylquinic acid; Epirosmanol; Ferulic acid; Gallic acid; Gallocatechin; Hydroxybenzoic acid-O-hexoside; Isorhamnetin-3-O-hexoside; Luteolin; Luteolin-3-O-glucuronide; Luteolin-7-O-glucoside; Luteolin-7-O-rutinoside; Medioresinol; Methyl apigenin; Methyl carnosate; Methoxycarnosol; Phloridzin; Protocatechuic acid; Quercetin; Quercetin-3-O-hexoside; Rosmarinic acid; Rutin; Syringic acid; Vanillic acid (163)*; Origanine A; Origanine B; Origanine C (164); Origanol A; Origanol B (165); Chicoric acid; Kaempferol (166)*; Salvianolic acid; Salvianolic acid B; Salvianolic acid C; Salvianolic acid H (167); (+)-catechin; (-)-epicatechin (168)</p>                                                                                                                                                                                                                                                                                                                                                                                                                                                                                                                                                                               |
| <p>Lamiaceae</p> <p><b><i>Salvia officinalis</i> L.</b></p> <p>Salvia</p>        | <p>4-hydroxyacetophenone 4-O-(6'-O-β-d-apiofuranosyl)-β-d-glucopyranoside; 6,8-di-C-β-d-glucosylapigenin (vicenin-2); 6-hydroxyluteolin 7-O-β-d-glucoside; 6-hydroxyluteolin 7-O-glucuronide; cis-p-coumaric acid 4-O-(2'-O-β-d-apiofuranosyl)-β-d-glucopyranoside; trans-p-coumaric acid 4-O-(2'-O-β-d-apiofuranosyl)-β-d-glucopyranoside isolated; Luteolin 3' -O-β-d-glucuronide; Luteolin 7-O-β-d-glucoside; Luteolin 7-O-β-d-glucuronide (169); Carvacrol; Eugenol; cis-ferruginol; trans-ferruginol; trans-totarol (170); 4-Hydroxybenzoic acid; Apigenin; Apigenin-7-O-glucoside; Apigenin-7-O-rutinoside; Caffeic acid; Caffeic acid hexoside; Carnosic acid; Carnosol; Chlorogenic acid; Cirsimaritin; Dicafeoylquinic acid; Epirosmanol; Ferulic acid; Gallic acid; Gallocatechin; Hydroxybenzoic acid-O-hexoside; Isorhamnetin; Isorhamnetin-3-O-hexoside; Luteolin; Luteolin-7-O-rutinoside; Medioresinol; Methyl apigenin; Methyl carnosate; Methoxycarnosol; Phloridzin; Protocatechuic acid; Quercetin; Quercetin-3-O-hexoside; Rosmarinic acid; Syringic acid; Vanillic acid (163)*; Apigenin-diglucuronide; Luteolin diglucuronide (171); Sagerinic acid; Salvianolic acid I;</p>                                                                                                                                                                                                                                                                                                                                                                                                                                                                                                                                                                                                                                                                                                                                                                                                                                                                                                                                                                                                    |

|                                                                 |                                                                                                                                                                                                                                                                                                                                                                                                                                                                                                                                                                                                                                                                                                                                                                                                                                                                                                                                                                                                                                                                                                                                                                                                                                                                                                                                                                                                                                                                                                                                                                                                                                                                                                                                                                                                                                                                                                                                                                                                                                                                                                                                                                                                       |
|-----------------------------------------------------------------|-------------------------------------------------------------------------------------------------------------------------------------------------------------------------------------------------------------------------------------------------------------------------------------------------------------------------------------------------------------------------------------------------------------------------------------------------------------------------------------------------------------------------------------------------------------------------------------------------------------------------------------------------------------------------------------------------------------------------------------------------------------------------------------------------------------------------------------------------------------------------------------------------------------------------------------------------------------------------------------------------------------------------------------------------------------------------------------------------------------------------------------------------------------------------------------------------------------------------------------------------------------------------------------------------------------------------------------------------------------------------------------------------------------------------------------------------------------------------------------------------------------------------------------------------------------------------------------------------------------------------------------------------------------------------------------------------------------------------------------------------------------------------------------------------------------------------------------------------------------------------------------------------------------------------------------------------------------------------------------------------------------------------------------------------------------------------------------------------------------------------------------------------------------------------------------------------------|
|                                                                 | Salvianolic acid K (172); Caffeoylquinic acid derivative; Cinnamic acid; p-Coumaric acid; Quinic acid; Quercetin-7-O-glucoside (153); Hispidulin (173); 4,5,7-Trihydroxy flavone; 4,5,7-Trihydroxy flavone isomer; 12-Methoxy-carnosic acid; 12-Methoxy carnosic acid; Asiatic acid; Baicalin; Caffeic acid-3-O-glucoside; Epiisorosmanol; Genkwanin; Hesperetin; Hesperidin; Hispidulin; Hispidulin glucuronide; Isorhamnetin-3-O-glucoside; Micromeric acid; Methyl rosmarinate; Pectolarigenin; Rosmadiol; Rosmadiol isomer; Rosmanol; Rosmanol methyl ether; Rosmanol methyl ether; Rosmaridiphenol; Rosmarinic acid-3-O-glucoside; Rutin; Salvianolic acid B; Scutellarin (174)                                                                                                                                                                                                                                                                                                                                                                                                                                                                                                                                                                                                                                                                                                                                                                                                                                                                                                                                                                                                                                                                                                                                                                                                                                                                                                                                                                                                                                                                                                                  |
| Lamiaceae<br><b><i>Salvia rosmarinus</i></b> Spenn.<br>Rosemary | Acacetin; Apigenin; Apigenin-7-O-glucoside; Apigenin-7-O-rutinoside; Caffeic acid; Caffeic acid hexoside; Carnosic acid; Carnosol; Chlorogenic acid; Cirsimaritin; p-Coumaric acid; Dicafeoylquinic acid; Epirosmanol; Ferulic acid; Gallic acid; Gallocatechin; Hydroxybenzoic acid-O-hexoside; Isorhamnetin; Luteolin; Luteolin-3-O-glucuronide; Luteolin-7-O-glucoside; Luteolin-7-O-rutinoside; Medioresinol; Methyl apigenin; Methyl carnosate; Methoxycarnosol; Phloridzin; Protocatechuic acid; Quercetin; Quercetin-3-O-hexoside; Rosmadiol; Rosmarinic acid; Rutin; Syringic acid; Vanillic acid (163)*; [9]-Shogaol; [9]-Shogaol isomer; 2,3,4,4a,10,10a-Hexahydro-5,6-dihydroxy-1,1-dimethyl-7-(1-methylethyl)-9(1H)-Phenanthrene; Nepetrin; Rosmaridiphenol (175); 12-O-Methylcarnosic acid; 4'-Methoxytecto-chrysin; 5,6,7,10-tetrahydro-7-hydroxy rosmariquinone; 5,6,7,10-tetrahydro-7-hydroxy rosmariquinone derivative; Carnosic acid derivative; Carnosic acid hexoside; Carnosol isomer; Carnosol methyl ether isomer; Dihydroxy-dimethoxyflavone; Dihydroxy-dimethoxyflavone derivative; Epiisorosmanol; Epiisorosmanol methyl ether; Eriodictyol; Genkwanin; Hesperetin; Hesperidin; Hispidulin-rutinoside; Homoplantagin; Isorhamnetin-rutinoside; Isosakuranetin; Luteolin-3'-acetyl-O-glucuronide; Luteolin-7-O-glucuronide; Medioresinol derivative; Medioresinol-glucuronide; Methyl rosmarinate; Rosmanol; Rosmanol methyl ether; Rosmanol methyl ether isomer; Rosmaridiphenol; Trihydroxy-methoxyflavone (176); 6-Hydroxyluteolin-7-O-glucoside; 6-Hydroxyluteolin-7-O-glucuronide; 12-Methoxy-carnosic acid; Asiatic acid; Caffeoyl-fructosyl-glucose; Diosmetin; Hispidulin glucuronide; Isorhamnetin-3-O-glucoside; Isorhamnetin-3-O-rutinoside; Luteolin-7-O-glucuronide; Micromeric acid; Narirutin; Pectolarigenin; Quinic acid; Rosmadiol isomer; Rosmanol isomer; Rosmarinic acid-3-O-glucoside; Sagerinic acid; Salvianolic acid B; Scutellarin (174); 3-p-coumaroylquinic acid; 4-O-Caffeoyl quinic acid; Hispidulin-7-O-glucoside; Kaempferol-7-O-hexoside; Phlorizin; Salvianolic acid A; Salvianolic acid B; Trihydroxy-methoxyflavone; Triptolidenol (177) |
| Lamiaceae<br><b><i>Thymus vulgaris</i></b> L.<br>Thyme          | 4-Hydroxybenzoic acid; Apigenin; Apigenin-7-O-glucoside; Apigenin-7-O-rutinoside; Caffeic acid; Caffeic acid hexoside; Carnosol; Chlorogenic acid; Cirsimaritin; p-Coumaric acid; Dicafeoylquinic acid; Epirosmanol; Ferulic acid; Gallic acid; Gallocatechin; Hydroxybenzoic acid-O-hexoside; Isorhamnetin; Isorhamnetin-3-O-hexoside; Luteolin; Luteolin-3-O-glucuronide; Luteolin-7-O-glucoside; Luteolin-7-O-rutinoside; Medioresinol; Methoxycarnosol; Methyl apigenin; Methyl carnosate; Phloridzin; Protocatechuic acid; Quercetin; Quercetin-3-O-hexoside; Rutin; Syringic acid; Thymol; Vanillic acid (163); Caffeoylquinic acid derivative; Carnosic acid; Cinnamic acid; Ferulic acid derivative; Methyl rosmarinate; Naringenin; Quercetin-7-O-glucoside; Quinic acid (153); Apigenin 6,8-di-C-glucoside; Caffeic acid derivative; Caffeic acid trimer; Lithospermic acid A; Luteolin-7-O-glucuronide; Methyl eriodictyol-O-pentosylhexoside; Quercetin-O-glucuronide; Rosmarinic acid hexoside (178); o-Coumaric acid (179); Apigenin-(?)O-hexuronide; Eriodictyol; Eriodictyol-(?)O-hexoside; Salvianolic acid I; Salvianolic acid K (180)                                                                                                                                                                                                                                                                                                                                                                                                                                                                                                                                                                                                                                                                                                                                                                                                                                                                                                                                                                                                                                              |
| Lauraceae<br><b><i>Laurus nobilis</i></b> L.<br>Bay laurel      | 9-O-β-D-xylopyranoside; 1-(2'-Hydroxyphenyl)-1-hydroxyphenylpropan-α-O-hexoside; 2-(4-Hydroxy-3-methoxyphenyl)-ethyl-O-β-D-glucopyranoside; 2',β-Dihydroxy-α,β-dihydrochalcone-α-O-hexoside; 2'-Hydroxy-α,β-dihydrochalcone-α-O-hexoside; 2-Hydroxycinnamic acid; 2''-O-Rhamnosyl-C-hexosyl-apigenin; Protocatechuic acid hexoside; 3'-Methoxyquercetin-3-O-[6-O-(rhamnopyranosyl) glucopyranoside]; 3'-Methoxyquercetin-3-O-glucopyranoside; 4-O-p-Coumaroylquinic acid; (+)-5'-Methoxysolaricresinol 9'-O-β-D-xylopyranoside; 8-C-Hexosyl apigenin; Apigenin; Apigenin 8-C-glucoside; Apigenin-6,8-di-C-hexoside; Apigenin-6-C-(2''-O-deoxyhexosyl)-hexoside; Apigenin-6-C-glucoside; Caffeic acid;                                                                                                                                                                                                                                                                                                                                                                                                                                                                                                                                                                                                                                                                                                                                                                                                                                                                                                                                                                                                                                                                                                                                                                                                                                                                                                                                                                                                                                                                                                 |



Caffeic acid-O-hexoside; (+)-Catechin; Chlorogenic acid; Cryptochlorogenic acid; Cinnamtannin B-1; Ferulic acid; Gallic acid; (+)-Gallic catechin; Gentisic acid; Hesperetin; Homovanillic acid; Homovanillic acid-O-hexoside; p-Hydroxybenzoic acid; m-Hydroxybenzoic acid; (Iso)rhamnetin-3-O-(6''-O-deoxyhexosyl)-hexoside; (Iso)rhamnetin-3-O-hexoside; Isorhamnetin-3-O-[6-O-(rhamnopyranosyl)glucopyranoside]; Isorhamnetin-3-O-glucopyranoside; Isorhamnetin-3-O-rhamnopyranosyl(1-6)-glucopyranoside; Isorhamnetin-O-hexoside; Isorhamnetin-O-pentoside; Isorhamnetin-O-rhamnoside; Isorhamnetin-O-rutinoside; Isovitexin-2''-rhamnoside; Kaempferol; Kaempferol-3,7-di-O- $\alpha$ -L-rhamnoside; Kaempferol-3-O- $\alpha$ -L-(2'',4''-di-Z-p-coumaroyl)-rhamnoside; Kaempferol-3-O- $\alpha$ -L-(2''-E-p-coumaroyl)-rhamnoside; Kaempferol-3-O- $\alpha$ -L-(2'',4''-di-E-p-coumaroyl)-pyranorhamnoside; Kaempferol-3-O- $\alpha$ -L-(3'',4''-di-E-p-coumaroyl)-rhamnoside; Kaempferol-3-O- $\alpha$ -L-(2''-Z-p-coumaroyl-4''-E-p-coumaroyl)-rhamnoside; Kaempferol-3-O-arabinopyranoside; Kaempferol-3-O-deoxyhexoside; Kaempferol-3-O-glucopyranoside; Kaempferol-3-O-p-coumarate; Kaempferol-3-O-pentoside; Kaempferol-3-O-rhamnopyranoside; Kaempferol-3-O-rutinoside; Kaempferol-O-hexoside; Kaempferol-O-pentoside; Lyoniside; Luteolin; Luteolin-6-C-glucoside; Naringenin; Neochlorogenic acid; Nobiletin; Peonidin 3-O-glucoside; Peonidin 3-O-rutinoside; Procyanidin B-2; Procyanidin B-4; Procyanidin B-5; Procyanidin B-7; Protocatechuic acid; Quercetin; Quercetin-3-O-(6''-O-deoxyhexosyl)-hexoside; Quercetin-3-O-[6-O-(rhamnopyranosyl)glucopyranoside]; Quercetin-3-O-deoxyhexoside; Quercetin-3-O-glucopyranoside (isoquercitrin); Quercetin-3-O-pentoside; Quercetin-3-O-rhamnopyranoside; Quercetin-3-O-rutinoside (Rutin); Quercetin-O-pentoside; Quercetin-O-rhamnoside; Rosmarinic acid; (+)-Secoisolariciresinol; Syringic acid; Tangeretin; Tetramethoxy-dihydroquercetin-3-O-pentoside; Vanillic acid; Vanillic acid-O-hexoside (181); Hyperoside; Kaempferol-3-coumaroyl-glucoside; Kaempferol-7-rhamnoside (182); Kaempferol-3-O- $\alpha$ -L-(2''-E, 4''-Z-dip-coumaroyl)-rhamnopyranoside; Kaempferol-3-O- $\alpha$ -L-(2''-Z, 4''-E-dip-coumaroyl)-rhamnopyranoside; Kaempferol-3-O- $\alpha$ -L-(3''-Z, 4''-di-E-p-coumaroyl)-rhamnopyranoside; Kaempferol-3-O- $\alpha$ -L-(3'', 4''-di-Z-p-coumaroyl)-rhamnopyranoside; Quercetin-3-O-hexoside (isomer 1 and 2); Quercetin-3-O-glucoside (183)

Table S4. Phenolic compounds identified in 10 Leafy Beverages

\*compounds identified in leaves and stems

|                                                                                                        |                                                                                                                                                                                                                                                                                                                                                                                                                                                                                                                                                                                                                                                                                                                                                                                                                                                                                                                                                                                                                                                                                                                                                                                                                                                                                                                                                                                                                                                                                                                                                                                             |
|--------------------------------------------------------------------------------------------------------|---------------------------------------------------------------------------------------------------------------------------------------------------------------------------------------------------------------------------------------------------------------------------------------------------------------------------------------------------------------------------------------------------------------------------------------------------------------------------------------------------------------------------------------------------------------------------------------------------------------------------------------------------------------------------------------------------------------------------------------------------------------------------------------------------------------------------------------------------------------------------------------------------------------------------------------------------------------------------------------------------------------------------------------------------------------------------------------------------------------------------------------------------------------------------------------------------------------------------------------------------------------------------------------------------------------------------------------------------------------------------------------------------------------------------------------------------------------------------------------------------------------------------------------------------------------------------------------------|
| <p>Aquifoliaceae</p> <p><b><i>Ilex paraguariensis</i></b> A.St.-Hil.</p> <p>Yerba mate</p>             | <p>3-O-Caffeoylquinic acid (chlorogenic acid); 3,4-Dicaffeoylquinic acid (isochlorogenic acid B); 3,5-Dicaffeoylquinic acid (isochlorogenic acid A); 4,5-Dicaffeoylquinic acid (isochlorogenic acid C); 4-O-Caffeoylquinic acid (cryptochlorogenic acid); 5-O-Caffeoylquinic acid (neochlorogenic acid) ; Caffeoylferuloylquinic acid; Caffeoylquinic acid; Caffeoylsinapoylquinic acid; Coumaroylquinic acid; Dicafeic acid; Dicafeoylquinic acid; Feruloylquinic acid; Kaempferol-3-O-glucoside; Kaempferol-3-O-rhamnoglucoside; Quercetin-3-O-rhamnoside; Rutin; Tricaffeoylquinic acid (184); Caffeic acid; Caffeoyl derivatives; Kaempferol; Quercetin; Quinic acid (185); Caffeoyl glucose; Dicafeoylshikimic acid (186); 3,4-dihydroxybenzoic acid; p-Coumaric acid; Gallic acid; Salvianolic acid (187); Naringenin (188); Quercetin-3-rhamnosylglucoside (189); Kaempferol-3-O-rutinoside (190); 5-Caffeoyl-3-feruloylquinic acid; 5-Hydroxyferulic acid; Caffeic acid 3-glucoside; Caffeoyl-p-coumaroylquinic acid; Cis-4,5-Dicaffeoylquinic acid (isochlorogenic acid C); cis-Mulberroside A; Eugenol; p-Coumaroylquinic acid; Quercetin 3-O-glucoside (isoquercitrin); 3-Caffeoyl-4-feruloylquinic acid (191)</p>                                                                                                                                                                                                                                                                                                                                                               |
| <p>Asteraceae</p> <p><b><i>Neurolaena lobata</i></b> (L.) Cass.</p> <p>Jackass bitters / Zeb'a pic</p> | <p>6-hydroxykaempferol; 6-hydroxykaempferol 3-methyl ether 7-glucoside; 6-hydroxykaempferol 3-methyl ether 7-sulfate; 6-hydroxykaempferol 3,7-dimethyl ether; 6-hydroxykaempferol 7-glucoside; 6-hydroxyluteolin 3'-methyl ether; 6-hydroxyluteolin 7-glucoside; Quercetagenin; Quercetagenin 3,6-dimethyl ethers; Quercetagenin 3,7-dimethyl ethers; Quercetagenin 3-methyl ether 7-glucoside; Quercetagenin 3-methyl ether 7-sulfate (192)</p>                                                                                                                                                                                                                                                                                                                                                                                                                                                                                                                                                                                                                                                                                                                                                                                                                                                                                                                                                                                                                                                                                                                                            |
| <p>Asteraceae</p> <p><b><i>Stevia rebaudiana</i></b> (Bertoni) Bertoni</p> <p>Stevia</p>               | <p>Apigenin-digalactoside; Apigenin-diglucoside; Apigenin-galactoside; Kaempferol-gluco-pyranoside; Kaempferol-gluco-sylrhamnosyl-galactoside; Kaempferol-gluco-sylrhamnosyl-galactoside; Kaempferol-rhamnopyranosyl-gluco-pyranoside (rutinoside) isomers; Kaempferolxylosylglucoside; Kaempferol 3-rhamnopyranosyl-rhamnopyranosyl-gluco-pyranoside; Luteolin-gluco-ruronide; Quercetin-diglucoside-rhamnoside; Quercetin-dirhamnoside; Quercetin-fructoside; Quercetin-galactoside; Quercetin-pentoside; Quercetin-trisaccharide; Rutin (193); 1,3-Dicaffeoylquinic acid; 1,3,5-Tricaffeoylquinic acid; 1,4-Dicaffeoylquinic acid; 3,4-Dicaffeoylquinic acid (isochlorogenic acid B); 3,4,5-Tricaffeoylquinic acid; 3-Caffeoylquinic acid (chlorogenic acid); 3-Caffeoylshikimic acid; 3-Feruloyl-5-caffeoylquinic acid; 3-Feruloylquinic acid; 4-Caffeoyl-5-feruloylquinic acid; 4-Caffeoylquinic acid (cryptochlorogenic acid); 4-Caffeoylshikimic acid; 4-Methoxybenzoic acid; 4-Methylcatechol; 5-Caffeoylquinic acid (neochlorogenic acid); 5-Caffeoylshikimic acid; 5-Feruloylquinic acid; 5-p-Coumaroylquinic acid; Caffeic acid; Cinnamic acid; Gallic acid; Galuteolin; Luteolin; p-Coumaric acid; Pyrogallol; Quercetin-3-O-glucoside; Quercitrin; Roseoside; Sinapic acid; Syringic acid; Trans-ferulic acid; Vanillic acid (194); Apigenin; Apigenin-7-O-hexoside; Esculin (esculetin-6-O-glucoside); Isorhamnetin; Isorhamnetin-3-O-deoxyhexosylhexoside; Naringenin; Protocatechuic acid-O-hexoside I; Protocatechuic acid-O-hexoside II; Syringic acid-hexoside (195)</p> |
| <p>Fabaceae</p> <p><b><i>Aspalathus linearis</i></b> (Burm.f.) R.Dahlgren</p> <p>Rooibos</p>           | <p>3,4,5-Trihydroxycinnamic acid; Sinapic acid (196); 3-Hydroxy-1-(4-hydroxy-3-methoxyphenyl)-2-[4-(3-hydroxy-1-(E)-propenyl)-2,6-dimethoxyphenoxy]propyl-O-glucoside; Aspalathin; p-Coumaric acid; Dihydro-iso-orientin [(R)/(S)-eriodictyol-6-glucoside]; Dihydro-orientin [(R)/(S)-eriodictyol-8-glucoside]; Esculetin; Hemiphlorin; p-Hydroxybenzoic acid; Hyperoside; Isoquercitrin; Isovitexin; Luteolin; Nothofagine; p-Hydroxyphenylglycol; Quercetin; Quercetin-3-O-B-d-robinoside;</p>                                                                                                                                                                                                                                                                                                                                                                                                                                                                                                                                                                                                                                                                                                                                                                                                                                                                                                                                                                                                                                                                                            |

|                                                                              |                                                                                                                                                                                                                                                                                                                                                                                                                                                                                                                                                                                                                                                                                                                                                                                                                                                                                                                                                                                                                                                                                                                                                                                                                                                                                                                                                                                                                                                                                                  |
|------------------------------------------------------------------------------|--------------------------------------------------------------------------------------------------------------------------------------------------------------------------------------------------------------------------------------------------------------------------------------------------------------------------------------------------------------------------------------------------------------------------------------------------------------------------------------------------------------------------------------------------------------------------------------------------------------------------------------------------------------------------------------------------------------------------------------------------------------------------------------------------------------------------------------------------------------------------------------------------------------------------------------------------------------------------------------------------------------------------------------------------------------------------------------------------------------------------------------------------------------------------------------------------------------------------------------------------------------------------------------------------------------------------------------------------------------------------------------------------------------------------------------------------------------------------------------------------|
|                                                                              | <p>Secoisolariciresinol; Secoisolariciresinol-O-glucoside; Vladinol F; Vanylglycol; Vitexin (197); Caffeic acid; Catechin; Chlorogenic acid; Chrysoeriol; Ferulic acid; Gallic acid; Gentsic acid; Isoorientin; Protocatechuic acid; Rutin; Salicylic acid; Syringic acid; Vanillic acid (198); Isorhamnetin; Naringenin; Naringin; Pinobanksin; Syringaldehyde (199); 3,4-DHPEA-EDA; 3-Methoxysinensetin; 4-Hydroxycoumarin; 5-Pentadecylresorcinol; 6-Geranyl naringenin; Apigenin-6,8-C-galactoside-C-arabinoside; Chrysoeriol-7-O-glucoside; Chrysin; Cyanidin; Cyanidin-3-O-(6''-acetyl-galactoside); Cyanidin-3-O-(6''-caffeoyl-glucoside); Daidzin; Feruloyl glucose; Formononetin; Galangin; Gardenin B; Genistein; Hispidulin; Isoxanthohumol; Isorhamnetin-3-O-galactoside; Isorhamnetin-3-O-glucuronide; Isorhamnetin-3-O-rutinoside; Juglone; Kaempferol-3-O-(6''-acetyl-galactoside)7-O-rhamnoside; Kaempferol-3-O-acetyl-glucoside; Kaempferol-3-O-rhamnoside; Kaempferol-7-O-glucoside; Ligstroside; Malvidin-3-O-glucoside; Matairesinol; Naringenin-6-C-glucoside; Naringenin-7-O-glucoside; Pelargonidin-3-O-sambubioside; Piceatannol-3-O-glucoside; Peonidin; Peonidin-3-O-(6''-p-coumaroyl-glucoside); Peonidin-3-O-galactoside; Petunidin-3-O-(6''-acetyl-galactoside); Petunidin-3-O-galactoside; Phloretin-2'-O-xylosyl-glucoside; Resveratrol; Sinapine; Tyrosol; Xanthohumol (200); Linearthin (201); Bioquercetin; Thermoposide (202)</p>                             |
| <p>Lamiaceae<br/><b><i>Coleus amboinicus</i></b> Lour.<br/>Indian borage</p> | <p>2-(3,4-Dihydroxybenzylidenyl)-3-(3,4-dihydroxyphenyl)-4-hydroxypentanedioic acid; 4-acetyl-3,5-dimethoxy-p-quinol; 5,3'-dihydroxy-7,4'-dimethoxyflavone; 5,4'-dihydroxy-7,3'-dimethoxyflavone; 5-hydroxy-7,3',4'-trimethoxyflavone; 5-hydroxy-7,4'-dimethoxyflavone; (+)-syringaresinol; Caffeic Acid; Carvacrol; Catechin; Chavicol; Chlorogenic Acid; Cirsimaritin; Ethyl salicylate; Gallic Acid; p-hydroxybenzoic acid; Isoquercitrin; Kaempferol; Kaempferol glycoside; Methylparaben; Quercetin; Quercitrin; Rosmarinic acid; Rutin; Salvianolic acid L; Salvigenin; Shimobashiric acid C; Thymoquinone; Thymol; Vanillic acid (203); Caffeoylquinic acid; Gallocatechin; Methyl gallate; Protocatechuic acid; Quinic acid; Salicylic acid glucoside; Sinapic acid hexose; Vicenin 1 (204); Catechol; <math>\alpha</math>-Coumaric acid; p-Coumaric acid; Ellagic acid; Eugenol; Ferulic acid; Myricetin; Naringin; Salicylic acid; Syringic acid (205); 3',7'-Dimethylquercetin; 5,7-Dihydroxy-4',6-dimethoxyflavone; Apigenin; Apigenin derivative; Apigenin-O-acetylglucuronide; Apigenin-O-Hexoside; Apigenin-O-(maloyl-Pentosyl); Carnosic acid derivative; Dihydroferulic acid-O-Glu; Dihydroxybenzoic acid; Epirosmanol; Luteolin; Luteolin 3'-(3-acetylglucuronide); Luteolin-O-Glucuronide; Luteolin-O-Hexoside; Luteolin-O-(Glucur-Maloyl); Luteolin-O-dHex-Hex; Rosmadial; Rosmanol; Rosmarinic acid derivative; Salvianolic acid C; Salvianolic acid C derivative (206)</p> |
| <p>Lamiaceae<br/><b><i>Mentha x piperita</i></b> L.<br/>Peppermint</p>       | <p>5,6-dihydroxy-7,3',4'-trimethoxyflavone; 5,6-dihydroxy-7,8,3',4'-tetramethoxyflavone; 5-O-desmethylnobiletin; Acacetin; Apigenin; Gardenin B; Gardenin D; Ladanein; Luteolin; Pebrellin; Salvigenin; Sideritoflavone; Sorbifolin; Thymonin; Thymusin; Xanthomicrol (207); 5,6-OH-7,8,3',4'-OMe-flavone; Apigenin 7-O-rutinoside (Isorhoifolin); Eriodictyol 7-O-glucoside; Eriodictyol 7-O-rutinoside (eriodictin); Hesperetin 7-O-rutinoside; Luteolin 7-O-glucoside; Luteolin 7-O-rutinoside (cyranoside) (208); Catechin; Cinnamic acid; Diosmetin; Diosmetin-7-O-rutinoside (Diosmin); Gallic acid; Naringenin; Naringin; Neohesperidin; Rutin; Syringic acid (209); Caffeic acid; Caftaric acid; Chlorogenic acid; o-Coumaric acid; p-Coumaric acid; Cryptochlorogenic acid; Isochlorogenic acid; m-Coumaric acid; Neochlorogenic acid; Protocatechuic acid; Rosmarinic acid (210)</p>                                                                                                                                                                                                                                                                                                                                                                                                                                                                                                                                                                                                   |

|                                                                                        |                                                                                                                                                                                                                                                                                                                                                                                                                                                                                                                                                                                                                                                                                                                                                                                                                                                                                                                                                                                                                                                                                                                                                                                                                                                                                                                                                                                                                                                                                                                                                                                                                                                                                                                                                                                                                                                                                                                                                                                                                                                                                                                                                                                                                                                                                                                                                                                                                                                                                                                                                                                                                                                                                                                                                                                                                                                                                                                                         |
|----------------------------------------------------------------------------------------|-----------------------------------------------------------------------------------------------------------------------------------------------------------------------------------------------------------------------------------------------------------------------------------------------------------------------------------------------------------------------------------------------------------------------------------------------------------------------------------------------------------------------------------------------------------------------------------------------------------------------------------------------------------------------------------------------------------------------------------------------------------------------------------------------------------------------------------------------------------------------------------------------------------------------------------------------------------------------------------------------------------------------------------------------------------------------------------------------------------------------------------------------------------------------------------------------------------------------------------------------------------------------------------------------------------------------------------------------------------------------------------------------------------------------------------------------------------------------------------------------------------------------------------------------------------------------------------------------------------------------------------------------------------------------------------------------------------------------------------------------------------------------------------------------------------------------------------------------------------------------------------------------------------------------------------------------------------------------------------------------------------------------------------------------------------------------------------------------------------------------------------------------------------------------------------------------------------------------------------------------------------------------------------------------------------------------------------------------------------------------------------------------------------------------------------------------------------------------------------------------------------------------------------------------------------------------------------------------------------------------------------------------------------------------------------------------------------------------------------------------------------------------------------------------------------------------------------------------------------------------------------------------------------------------------------------|
| <p>Poaceae</p> <p><b><i>Cymbopogon citratus</i></b> (DC.) Stapf</p> <p>Lemon grass</p> | <p>Carlinoside; Cassiaoccidentalin B; Chlorogenic acid; p-Coumaric acid; Feruloylquinic acid; Isoschaftoside; Isoorientin 2''-O-rhamnoside; Kurilensin A; Luteolin 6-C-pentoside; Luteolin 7-O-neohesperidoside (211); Apigenin; Carnosic acid; Cinnamic acid; Ferulic acid; Gallic acid; Pyrogallol; Quercetin; Rutin (212); Apigenin 6-C-<math>\alpha</math>-Arabinopyranosyl-8-C-<math>\beta</math>-glucopyranosyl; Apigenin 6-C-Pentosyl-8-C-hexosyl; Isoorientin; Luteolin 2''-O-<math>\alpha</math>-L-Rhamnosyl-6-C-<math>\alpha</math>-arabinofuranosyl; Luteolin 2''-O-Rhamnosyl-(6-deoxy-ribo-hexos-3-ulosyl); Luteolin 6-C-<math>\beta</math>-Glucopyranosyl-8-C-<math>\alpha</math>-arabinopyranosyl; Luteolin 6-C-Pentosyl; Luteolin 6-C-Pentosyl-8-C-deoxyhexosyl; Luteolin 6-C-Pentosyl-8-C-pentosyl; Luteolin 7-O-<math>\beta</math>-Glucopyranosyl; Luteolin 7-O-Neohesperosyl (213); Caffeic acid; Catechin; Dihydroxybenzoic acid; Epicatechin; Kaempferol; Rosmarinic acid; Syringic acid; Trans-ferulic acid; Vanilic acid (214)</p>                                                                                                                                                                                                                                                                                                                                                                                                                                                                                                                                                                                                                                                                                                                                                                                                                                                                                                                                                                                                                                                                                                                                                                                                                                                                                                                                                                                                                                                                                                                                                                                                                                                                                                                                                                                                                                                                                |
| <p>Theaceae</p> <p><b><i>Camellia sinensis</i></b> (L.) Kuntze</p> <p>Tea</p>          | <p>Catechin; Formononetin; Galangin; Genistin; Glabridin; Licochalcone A; Liquiritin; Luteolin; Naringenin; Ononin; Quercetin; Umbelliferone (215); Caffeic acid; p-Coumaric acid; Ferulic acid; Gallic acid; Protocatechuic acid; Quinic acid; Salicylic acid; Sinapic acid; Succinic acid; Syringic acid (216); 1,2,4-Trigalloylglucose; 1,2,6-Trigalloylglucose; 3-O-Caffeoylquinic acid (chlorogenic acid); 3-p-Coumaroylquinic acid; 3-p-Coumaroylquinic acid; 3-O-glucosyl-rhamnosyl-galactoside; 4-O-Caffeoylquinic acid (cryptochlorogenic acid); 4-p-Coumaroylquinic acid; 5-O-Caffeoylquinic acid (neochlorogenic acid); 5-p-Coumaroylquinic acid; Assamicain A; Camellianin B; Chalcone; Dehydrotheasinensin C isomer 1; Dehydrotheasinensin C isomer 2; Dehydrotheasinensin C isomer 3; Ellagic acid; ECG-(4<math>\beta</math>6)-ECG; ECG-(4<math>\beta</math>8)-ECG; Ent-epicatechin-(4a<math>\rightarrow</math>8)-ent-epicatechin-3''-gallate; Ent-epicatechin-(4a<math>\rightarrow</math>8)-ent-epicatechin-3-gallate; Epiafzelechin; Epiafzelechin-3-O-gallate; Epicatechin; Epicatechin-3-O-gallate; Epicatechin-3-O-(3''-O-methyl)-gallate; Epicatechin-(<math>\beta\rightarrow</math>8)-epigallocatechin-3-O-gallate; Epigallocatechin; Epigallocatechin-3-O-gallate; Epigallocatechin-3-O-(3''-O-methyl)-gallate; Epigallocatechin-3-O-(4-hydroxybenzoate); Epigallocatechin-caffeate isomer 1; Epigallocatechin-caffeate isomer 2; Epigallocatechin-caffeate isomer 3; Gallocatechin; Gallocatechin-3-O-(3''-O-methyl)-gallate; Gallocatechin-3-O-(4''-O-methyl)-gallate; Gallocatechin-glucoside isomer 1; Gallocatechin-glucoside isomer 2; Gallocatechin-glucoside isomer 3; Hyperoside; Isoquercitrin; Isotheaflavin; Isoschaftoside; Isovitexin; Isovitexin-2''-O-glucoside; Kaempferol; Kaempferol-3-galactoside (trifolin); Kaempferol-3-O-galactoside (astragalin); Kaempferol-3-O-galactosyl-rutinoside; Kaempferol-3-O-glucoside (astragalin); Kaempferol-3-O-glucoside (nicotiflorin); Kaempferol-3-O-glucosyl-rutinoside; Kaempferol-3-robinobioside; Kaempferol-7-O-rhamnosyl-rutinoside; Myricetin 3-O-rutinoside; Myricetin-3-O-galactoside; Myricetin-3-O-glucoside; Neotheaflavin 3-O-gallate; Procyanidin B2; Procyanidin B3; Procyanidin B5; Procyanidin C isomer 1; Procyanidin C isomer 2; Procyanidin C isomer 3; Procyanidin C isomer 4; Quercetin 3-O-rutinoside (rutin); Quercetin-3-O-dirhamnosylgalactoside; Quercetin-3-O-galactoside (hyperoside); Quercetin-3-O-glucoside (isoquercitrin); Quercetin-3-O-glucosyl-rhamnosyl-galactoside; Quercetin-3-O-glucosyl-rhamnosyl-glucoside; Sanguin H1; Samarangenin B; Tiliroside; Theacitrin C; Theaflavin; Theaflavin-3,3''-digallate; Theaflavin-3-gallate; Theaflavin-3-O-(3-O-methyl) gallate; Theasinensin A; Theasinensin B; Theasinensin C; Theasinensin D; Theasinensin E; Theogallin; Vitexin; Vitexin-2''-O-glucoside (217)</p> |
| <p>Verbenaceae</p> <p><b><i>Verbena officinalis</i></b> L.</p> <p>Common vervain</p>   | <p>1,5-O-dicaffeoylquinic acid; 4,5-O-dicaffeoylquinic acid (isochlorogenic acid C); Apigenin; Apigenin 7-O-diglucuronide; Apigenin 7-O-galactoside; Apigenin 7-O-glucoside; Isoverbascoside; Luteolin 7-O-diglucuronide; Luteolin 7-O-glucoside; Luteolin 7-O-glucuronide; Pedalitin 6-O-(2-O-feruloyl)-diglucuronide; Pedalitin 6-O-diglucuronide; Pedalitin 6-O-galactoside; Pedalitin 6-O-glucoside; Scutellarein 7-O-(2-O-feruloyl)-diglucuronide; Scutellarein 7-O-diglucuronide;</p>                                                                                                                                                                                                                                                                                                                                                                                                                                                                                                                                                                                                                                                                                                                                                                                                                                                                                                                                                                                                                                                                                                                                                                                                                                                                                                                                                                                                                                                                                                                                                                                                                                                                                                                                                                                                                                                                                                                                                                                                                                                                                                                                                                                                                                                                                                                                                                                                                                             |

|                                                                                        |                                                                                                                                                                                                                                                                                                                                                                                                                                                                                                                                                                                                                                                                                                                                                                                                                                          |
|----------------------------------------------------------------------------------------|------------------------------------------------------------------------------------------------------------------------------------------------------------------------------------------------------------------------------------------------------------------------------------------------------------------------------------------------------------------------------------------------------------------------------------------------------------------------------------------------------------------------------------------------------------------------------------------------------------------------------------------------------------------------------------------------------------------------------------------------------------------------------------------------------------------------------------------|
|                                                                                        | Scutellarein 7-O-glucoside; Scutellarein 7-O-glucuronide; Verbascoside (218); 13"4"-diacetyl-O-betonyoside A; 2"4"-diacetyl-O-verbascoside; 3",4"-diacetyl-O-isoverbascoside; 4"-O-acetyl-O-isoverbascoside; 4"-acetyl-O-verbascoside; 4",6"-diacetyl-O-betonyoside A; 6"-acetyl-O-verbascoside; Betonyoside A; Campneoside II; Isocampneoside II (219)*; Catechin; Cirsilineo; Naringenin; Rutin (quercetin-3-O-rutinoside) (220)                                                                                                                                                                                                                                                                                                                                                                                                       |
| Zingiberaceae<br><br><i>Alpinia zerumbet</i> (Pers.) B.L.Burtt & R.M.Sm.<br><br>Atoumo | Caffeic acid; Cinnamic acid; p-Coumaric acid; Epicatechin 3-O-gallate; Eucomic acid; Ferulyl O-glyceryl glucuronic acid; Ferulyl O-glyceryl glucuronic acid; Ferulic acid; Ferulic acid acyl-glucoside; Ferulic acid propionyl-glucoside; Gallic acid; Isorhamnetin 3-O-glucoside; Isorhamnetin 3-O-rutinoside; Isorhamnetin-3-O-β-d-glucuronide; Isoferulic acid; Isoferulic acid 3-O-β-glucopyranoside; Kaempferol 3-O-glucoside; Kaempferol 3-O-rutinoside; Kaempferol-3-O-β-d-glucuronide; Malic acid; Protocatechuic acid; Quercetin 3-O-glucoside; Quercetin 3-O-pentoside; Quinic acid; Salicylic acid; Sinapic acid; Sinapic acid 3-O-glucoside; Syringic acid; Vanillic acid; Vanillic acid 4-β-d-glucoside (221); Alpinetin; B-type procyanidin dimer; Catechin; Epicatechin; Pinocembrin; Pinostrobin; Proanthocyanidin (222) |

#### Supplementary references:

1. Gil MI, Ferreres F, Tomás-Barberán FA. Effect of Modified Atmosphere Packaging on the Flavonoids and Vitamin C Content of Minimally Processed Swiss Chard (*Beta vulgaris* Subspecies *cycla*). *J Agric Food Chem*. 1998 May 1;46(5):2007–12.
2. Kim I, Chin YW, Lim SW, Kim YC, Kim J. Norisoprenoids and hepatoprotective flavone glycosides from the aerial parts of *Beta vulgaris* var. *cicla*. *Arch Pharm Res*. 2004 Jun 1;27(6):600–3.
3. Pyo YH, Lee TC, Logendra L, Rosen RT. Antioxidant activity and phenolic compounds of Swiss chard (*Beta vulgaris* subspecies *cycla*) extracts. *Food Chem*. 2004 Mar 1;85(1):19–26.
4. Ninfali P, Bacchiocca M, Antonelli A, Biagiotti E, Di Gioacchino AM, Piccoli G, et al. Characterization and biological activity of the main flavonoids from Swiss Chard (*Beta vulgaris* subspecies *cycla*). *Phytomedicine*. 2007 Feb 19;14(2):216–21.
5. Abd El-Ghffar EA, Hegazi NM, Saad HH, Soliman MM, El-Raey MA, Shehata SM, et al. HPLC-ESI- MS/MS analysis of beet (*Beta vulgaris*) leaves and its beneficial properties in type 1 diabetic rats. *Biomed Pharmacother*. 2019 Dec;120:109541.
6. Mzoughi Z, Chahdoura H, Chakroun Y, Cámara M, Fernández-Ruiz V, Morales P, et al. Wild edible Swiss chard leaves (*Beta vulgaris* L. var. *cicla*): Nutritional, phytochemical composition and biological activities. *Food Res Int*. 2019 May 1;119:612–21.
7. Medic A, Zamljen T, Grohar MC, Slatnar A, Hudina M, Veberic R. Using HPLC–MS/MS to Assess the Quality of Beet, Mizuna, Lettuce and Corn Salad after Juglone and Walnut Leaf Extract Treatments. *Agronomy*. 2022 Feb;12(2):347.
8. Edenharter R, Keller G, Platt KL, Unger KK. Isolation and Characterization of Structurally Novel Antimutagenic Flavonoids from Spinach (*Spinacia oleracea*). *J Agric Food Chem*. 2001 Jun 1;49(6):2767–73.
9. Khanam UKS, Oba S, Yanase E, Murakami Y. Phenolic acids, flavonoids and total antioxidant capacity of selected leafy vegetables. *J Funct Foods*. 2012 Oct 1;4(4):979–87.
10. Hussain PR, Suradkar P, Javaid S, Akram H, Parvez S. Influence of postharvest gamma irradiation treatment on the content of bioactive compounds and antioxidant activity of fenugreek (*Trigonella foenum-graceum* L.) and spinach (*Spinacia oleracea* L.) leaves. *Innov Food Sci Emerg Technol*. 2016 Feb 1;33:268–81.

11. Singh A, Singh P, Kumar B, Kumar S, Dev K, Maurya R. Detection of flavonoids from *Spinacia oleracea* leaves using HPLC-ESI-QTOF-MS/MS and UPLC-QqQLIT-MS/MS techniques. *Nat Prod Res.* 2019 Aug 3;33(15):2253–6.
12. Yuk HJ, Ryu HW, Kim DY, Park MH, Seo WD, Jeong SH, et al. Comparison of flavonoid and policosanol profiles in Korean winter-spinach (*Spinacia oleracea* L.) cultivated in different regions. *Food Chem.* 2019 May 1;279:202–8.
13. Fattorusso E, Lanzotti V, Tagliatalata-Scafati O, Cicala C. The flavonoids of leek, *Allium porrum*. *Phytochemistry.* 2001 Jun 1;57(4):565–9.
14. Donna LD, Mazzotti F, Taverna D, Napoli A, Sindona G. Structural Characterisation of Malonyl Flavonols in Leek (*Allium porrum* L.) Using High-performance Liquid Chromatography and Mass Spectrometry. *Phytochem Anal.* 2014;25(3):207–12.
15. Soininen TH, Jukarainen N, Soininen P, Auriola SOK, Julkunen-Tiitto R, Oleszek W, et al. Metabolite Profiling of Leek (*Allium porrum* L) Cultivars by <sup>1</sup>H NMR and HPLC–MS. *Phytochem Anal.* 2014;25(3):220–8.
16. Radovanović B, Mladenović J, Radovanovic A, Pavlović R, Nikolić V. Phenolic Composition, Antioxidant, Antimicrobial and Cytotoxic Activities of *Allium porrum* L. (Serbia) Extracts. *J Food Nutr Res.* 2015; 3(9):564-569
17. Sorour M. Natural Antioxidant Changes in Fresh and Dried celery (*Apium graveolens*). *Am J Energy Eng.* 2015 Jan 1;3:12.
18. Liu G, Zhuang L, Song D, Lu C, Xu X. Isolation, purification, and identification of the main phenolic compounds from leaves of celery (*Apium graveolens* L. var. *dulce* Mill./Pers.). *J Sep Sci.* 2017;40(2):472–9.
19. Liu DK, Xu CC, Zhang L, Ma H, Chen XJ, Sui YC, et al. Evaluation of bioactive components and antioxidant capacity of four celery (*Apium graveolens* L.) leaves and petioles. *Int J Food Prop.* 2020 Jan 1;23(1):1097–109.
20. Emad AM, Rasheed DM, El-Kased RF, El-Kersh DM. Antioxidant, Antimicrobial Activities and Characterization of Polyphenol-Enriched Extract of Egyptian Celery (*Apium graveolens* L., Apiaceae) Aerial Parts via UPLC/ESI/TOF-MS. *Molecules.* 2022 Jan;27(3):698.
21. Goupy PM, Varoquaux PJA, Nicolas JJ, Macheix JJ. Identification and localization of hydroxycinnamoyl and flavonol derivatives from endive (*Cichorium endivia* L. cv. *Geante Maraichere*) leaves. *J Agric Food Chem.* 1990 Dec;38(12):2116–21.
22. Llorach R, Martínez-Sánchez A, Tomás-Barberán FA, Gil MI, Ferreres F. Characterisation of polyphenols and antioxidant properties of five lettuce varieties and escarole. *Food Chem.* 2008 Jun;108(3):1028–38.
23. Mascherpa D, Carazzone C, Marrubini G, Gazzani G, Papetti A. Identification of Phenolic Constituents in *Cichorium endivia* Var. *crispum* and Var. *latifolium* Salads by High-Performance Liquid Chromatography with Diode Array Detection and Electrospray Ionization Tandem Mass Spectrometry. *J Agric Food Chem.* 2012 Dec 12;60(49):12142–50.
24. Khalil H, Kamel M. Phytochemical and biological studies of *Cichorium endivia* L. leaves. *J Pharm Sci Res.* 2015 Aug 1;7:509–13.
25. Donadio G, Bellone ML, Mensitieri F, Parisi V, Santoro V, Vitiello M, et al. Characterization of Health Beneficial Components in Discarded Leaves of Three Escarole (*Cichorium endivia* L.) Cultivar and Study of Their Antioxidant and Anti-Inflammatory Activities. *Antioxidants.* 2023 Jul;12(7):1402.
26. Barry TN. The feeding value of chicory (*Cichorium intybus*) for ruminant livestock. *J Agric Sci.* 1998 Nov;131(3):251–7.
27. Mulabagal V, Wang H, Ngouajio M, Nair MG. Characterization and quantification of health beneficial anthocyanins in leaf chicory (*Cichorium intybus*) varieties. *Eur Food Res Technol.* 2009 Nov 1;230(1):47–53.
28. Patil DrG. FLAVONE AND FLAVONE GLYCOSIDE FROM LEAVES OF CICHORIUM INTYBUS LINN. *IJPSR.* 2012 Mar 1;3:801–5.

29. Carazzone C, Mascherpa D, Gazzani G, Papetti A. Identification of phenolic constituents in red chicory salads (*Cichorium intybus*) by high-performance liquid chromatography with diode array detection and electrospray ionisation tandem mass spectrometry. *Food Chem.* 2013 Jun 1;138(2):1062–71.
30. Frond AD, Iuhas CI, Stirbu I, Leopold L, Socaci S, Andreea S, et al. Phytochemical Characterization of Five Edible Purple-Reddish Vegetables: Anthocyanins, Flavonoids, and Phenolic Acid Derivatives. *Molecules.* 2019 Jan;24(8):1536.
31. Stanciu G, Rotariu R, Popescu A, Tomescu A. Phenolic and Mineral Composition of Wild Chicory Grown in Romania. *Rev Chim.* 2019 May 15;70(4):1173–7.
32. Ferreres F, Gil MI, Castañer M, Tomás-Barberán FA. Phenolic Metabolites in Red Pigmented Lettuce (*Lactuca sativa*). Changes with Minimal Processing and Cold Storage. *J Agric Food Chem.* 1997 Nov 1;45(11):4249–54.
33. Baur S, Klaiber RG, Koblo A, Carle R. Effect of Different Washing Procedures on Phenolic Metabolism of Shredded, Packaged Iceberg Lettuce during Storage. *J Agric Food Chem.* 2004 Nov 1;52(23):7017–25.
34. Ribas-Agustí A, Gratacós-Cubarsí M, Sárraga C, García-Regueiro JA, Castellari M. Analysis of Eleven Phenolic Compounds Including Novel p-Coumaroyl Derivatives in Lettuce (*Lactuca sativa* L.) by Ultra-high-performance Liquid Chromatography with Photodiode Array and Mass Spectrometry Detection. *Phytochem Anal.* 2011;22(6):555–63.
35. Al Nomaani RSS, Hossain MA, Weli AM, Al-Riyami Q, Al-Sabahi JN. Chemical composition of essential oils and in vitro antioxidant activity of fresh and dry leaves crude extracts of medicinal plant of *Lactuca Sativa* L. native to Sultanate of Oman. *Asian Pac J Trop Biomed.* 2013 May;3(5):353–7.
36. Pepe G, Sommella E, Manfra M, De Nisco M, Tenore GC, Scopa A, et al. Evaluation of anti-inflammatory activity and fast UHPLC–DAD–IT-TOF profiling of polyphenolic compounds extracted from green lettuce (*Lactuca sativa* L.; var. Maravilla de Verano). *Food Chem.* 2015 Jan 15;167:153–61.
37. Mampholo BM, Maboko MM, Soundy P, Sivakumar D. Phytochemicals and Overall Quality of Leafy Lettuce (*Lactuca sativa* L.) Varieties Grown in Closed Hydroponic System. *J Food Qual.* 2016;39(6):805–15.
38. Assefa AD, Choi S, Lee JE, Sung JS, Hur OS, Ro NY, et al. Identification and quantification of selected metabolites in differently pigmented leaves of lettuce (*Lactuca sativa* L.) cultivars harvested at mature and bolting stages. *BMC Chem.* 2019 Dec;13(1):1–15.
39. Zhou W, Liang X, Li K, Dai P, Li J, Liang B, et al. Metabolomics analysis reveals potential mechanisms of phenolic accumulation in lettuce (*Lactuca sativa* L.) induced by low nitrogen supply. *Plant Physiol Biochem.* 2021 Jan 1;158:446–53.
40. Choi J, An J, Lee HD, Kim WJ, Lee S, Lee S. Comprehensive Analysis of Phenolic Compounds, Carotenoids, and Antioxidant Activities in *Lactuca sativa* var. *longifolia* Cultivated in a Smart Farm System. *Processes.* 2023 Oct;11(10):2993.
41. Grzegorzewski F, Rohn S, Kroh LW, Geyer M, Schlüter O. Surface morphology and chemical composition of lamb's lettuce (*Valerianella locusta*) after exposure to a low-pressure oxygen plasma. *Food Chem.* 2010 Oct 15;122(4):1145–52.
42. Ramos-Bueno RP, Rincón-Cervera MA, González-Fernández MJ, Guil-Guerrero JL. Phytochemical Composition and Antitumor Activities of New Salad Greens: Rucola (*Diplotaxis tenuifolia*) and Corn Salad (*Valerianella locusta*). *Plant Foods Hum Nutr.* 2016 Jun 1;71(2):197–203.
43. Długosz-Grochowska O, Wojciechowska R, Kruczek M, Habela A. Supplemental lighting with LEDs improves the biochemical composition of two *Valerianella locusta* (L.) cultivars. *Hortic Environ Biotechnol.* 2017 Oct 1;58(5):441–9.
44. Schmitzer V, Senica M, Slatnar A, Stampar F, Jakopic J. Changes in Metabolite Patterns During Refrigerated Storage of Lamb's lettuce (*Valerianella locusta* L. Betcke). *Front Nutr.* 2021 Oct 6;8:731869.

45. Hernández V, Botella MÁ, Hellín P, Cava J, Fenoll J, Mestre T, et al. Phenolic and Carotenoid Profile of Lamb's Lettuce and Improvement of the Bioactive Content by Preharvest Conditions. *Foods*. 2021 Jan;10(1):188.
46. Nielsen JK, Olsen CE, Petersen MK. Acylated flavonol glycosides from cabbage leaves. *Phytochemistry*. 1993 Sep;34(2):539–44.
47. McDougall GJ, Fyffe S, Dobson P, Stewart D. Anthocyanins from red cabbage – stability to simulated gastrointestinal digestion. *Phytochemistry*. 2007 May 1;68(9):1285–94.
48. Velasco P, Francisco M, Moreno DA, Ferreres F, García-Viguera C, Cartea ME. Phytochemical fingerprinting of vegetable *Brassica oleracea* and *Brassica napus* by simultaneous identification of glucosinolates and phenolics. *Phytochem Anal*. 2011;22(2):144–52.
49. Gaafar AA, Aly HF, Salama ZA, Mahmoud KM. CHARACTERIZING THE ANTIOXIDANT AND ANTICANCER PROPERTIES OF SECONDARY METABOLITES FROM RED AND WHITE CABBAGES *BRASSICA OLERACEA L. VAR. CAPITATA*. *World J Pharm*. 2014 Res. 3(4):171–186.
50. Fang S, Lin F, Qu D, Liang X, Wang L. Characterization of Purified Red Cabbage Anthocyanins: Improvement in HPLC Separation and Protective Effect against H<sub>2</sub>O<sub>2</sub>-Induced Oxidative Stress in HepG2 Cells. *Molecules*. 2019 Jan;24(1):124.
51. Mansour KA, Moustafa SF, Abdelkhalik SM. High-Resolution UPLC-MS Profiling of Anthocyanins and Flavonols of Red Cabbage (*Brassica oleracea L. var. capitata f. rubra DC.*) Cultivated in Egypt and Evaluation of Their Biological Activity. *Molecules*. 2021 Jan;26(24):7567.
52. Yang X, Liao X, Yu L, Rao S, Chen Q, Zhu Z, et al. Combined metabolome and transcriptome analysis reveal the mechanism of selenate influence on the growth and quality of cabbage (*Brassica oleracea var. capitata L.*). *Food Res Int*. 2022 Jun 1;156:111135.
53. Ayaz FA, Hayrioglu-Ayaz S, Alpay-Karaoglu S, Grúz J, Valentová K, Ulrichová J, et al. Phenolic acid contents of kale (*Brassica oleracea L. var. acephala DC.*) extracts and their antioxidant and antibacterial activities. *Food Chem*. 2008 Mar;107(1):19–25.
54. Olsen H, Aaby K, Borge GIA. Characterization and Quantification of Flavonoids and Hydroxycinnamic Acids in Curly Kale (*Brassica oleracea L. Convar. acephala Var. sabellica*) by HPLC-DAD-ESI-MSn. *J Agric Food Chem*. 2009 Apr 8;57(7):2816–25.
55. Olsen H, Aaby K, Borge GIA. Characterization, Quantification, and Yearly Variation of the Naturally Occurring Polyphenols in a Common Red Variety of Curly Kale (*Brassica oleracea L. convar. acephala var. sabellica cv. 'Redbor'*). *J Agric Food Chem*. 2010 Nov 10;58(21):11346–54.
56. Jeon J, Kim JK, Kim H, Kim YJ, Park YJ, Kim SJ, et al. Transcriptome analysis and metabolic profiling of green and red kale (*Brassica oleracea var. acephala*) seedlings. *Food Chem*. 2018 Feb 15;241:7–13.
57. Rochfort SJ, Imsic M, Jones R, Trenerry VC, Tomkins B. Characterization of Flavonol Conjugates in Immature Leaves of Pak Choi [*Brassica rapa L. Ssp. chinensis L. (Hanelt.)*] by HPLC-DAD and LC-MS/MS. *J Agric Food Chem*. 2006 Jun 1;54(13):4855–60.
58. Harbaum B, Hubbermann EM, Wolff C, Herges R, Zhu Z, Schwarz K. Identification of oiganin Pak Choi Varieties (*Brassica campestris L. ssp. chinensis var. communis*) by HPLC-ESI-MS n and NMR and Their Quantification by HPLC-DAD. *J Agric Food Chem*. 2007 Oct 1;55(20):8251–60.
59. Harbaum B, Hubbermann EM, Zhu Z, Schwarz K. Free and bound phenolic compounds in leaves of pak choi (*Brassica campestris L. ssp. chinensis var. communis*) and Chinese leaf mustard (*Brassica juncea Coss.*). *Food Chem*. 2008 Oct;110(4):838–46.



60. Zhang Y, Chen G, Dong T, Pan Y, Zhao Z, Tian S, et al. Anthocyanin Accumulation and Transcriptional Regulation of Anthocyanin Biosynthesis in Purple Bok Choy (*Brassica rapa* var. *chinensis*). *J Agric Food Chem*. 2014 Dec 24;62(51):12366–76.
61. Jeon J, Lim CJ, Kim JK, Park SU. Comparative Metabolic Profiling of Green and Purple Pakchoi (*Brassica Rapa* Subsp. *Chinensis*). *Molecules*. 2018 Jul;23(7):1613.
62. Ma X, Ding Q, Hou X, You X. Analysis of Flavonoid Metabolites in Watercress (*Nasturtium officinale* R. Br.) and the Non-Heading Chinese Cabbage (*Brassica rapa* ssp. *chinensis* cv. *Aijiaohuang*) Using UHPLC-ESI-MS/MS. *Molecules*. 2021 Sep 26;26(19):5825.
63. Zhao Y, Qi X, Liu Z, Zheng W, Guan J, Liu Z, et al. Transcriptome and Metabolome Profiling to Explore the Causes of Purple Leaves Formation in Non-Heading Chinese Cabbage (*Brassica rapa* L. ssp. *chinensis* Makino var. *mutliceptis* Hort.). *Foods*. 2022 Jan;11(12):1787.
64. Thiruvengadam M, Kim SH, Chung IM. Exogenous phytohormones increase the accumulation of health-promoting metabolites, and influence the expression patterns of biosynthesis related genes and biological activity in Chinese cabbage (*Brassica rapa* spp. *pekinensis*). *Sci Hortic*. 2015 Sep 22;193:136–46.
65. Yeo HJ, Ki WY, Lee S, Kim CY, Kim JK, Park SU, et al. Metabolite profiles and biological activities of different phenotypes of Chinese cabbage (*Brassica rapa* ssp. *Pekinensis*). *Food Res Int*. 2023 Dec 1;174:113619.
66. Bell L, Wagstaff C. Glucosinolates, Myrosinase Hydrolysis Products, and Flavonols Found in Rocket (*Eruca sativa* and *Diplotaxis tenuifolia*). *J Agric Food Chem*. 2014 May 21;62(20):4481–92.
67. Bell L, Oruna-Concha MJ, Wagstaff C. Identification and quantification of glucosinolate and flavonol compounds in rocket salad (*Eruca sativa*, *Eruca vesicaria* and *Diplotaxis tenuifolia*) by LC–MS: Highlighting the potential for improving nutritional value of rocket crops. *Food Chem*. 2015 Apr 1;172:852–61.
68. Weckerle B, Michel K, Balázs B, Schreier P, Tóth G. Quercetin 3,3',4'-tri-O-β-d-glucopyranosides from leaves of *Eruca sativa* (Mill.). *Phytochemistry*. 2001 Jun 1;57(4):547–51.
69. Bennett RN, Rosa EAS, Mellon FA, Kroon PA. Ontogenic Profiling of Glucosinolates, Flavonoids, and Other Secondary Metabolites in *Eruca sativa* (Salad Rocket), *Diplotaxis eruroides* (Wall Rocket), *Diplotaxis tenuifolia* (Wild Rocket), and *Bunias orientalis* (Turkish Rocket). *J Agric Food Chem*. 2006 May 1;54(11):4005–15.
70. Michael HN, Shafik RE, Rasmy GE. Studies on the chemical constituents of fresh leaf of *Eruca sativa* extract and its biological activity as anticancer agent in vitro. *J. Med. Plants Res*. 2011;5(7):1184-1191.
71. Villatoro-Pulido M, Priego-Capote F, Álvarez-Sánchez B, Saha S, Philo M, Obregón-Cano S, et al. An approach to the phytochemical profiling of rocket [*Eruca sativa* (Mill.) Thell]. *J Sci Food Agric*. 2013;93(15):3809–19.
72. Sadiq A, Hayat MQ, Murad S. Qualitative and Quantitative Determination of Secondary metabolites and Antioxidant Potential of *Eruca sativa*. *Nat Prod Chem Res*. 2014 May 22;2:7.
73. Taranto F, Francese G, Di Dato F, D'Alessandro A, Greco B, Onofaro Sanajà V, et al. Leaf Metabolic, Genetic, and Morphophysiological Profiles of Cultivated and Wild Rocket Salad (*Eruca* and *Diplotaxis* Spp.). *J Agric Food Chem*. 2016 Jul 27;64(29):5824–36.
74. Awadelkareem AM, Al-Shammari E, Elkhailifa AEO, Adnan M, Siddiqui AJ, Snoussi M, et al. Phytochemical and In Silico ADME/Tox Analysis of *Eruca sativa* Extract with Antioxidant, Antibacterial and Anticancer Potential against Caco-2 and HCT-116 Colorectal Carcinoma Cell Lines. *Molecules*. 2022 Jan;27(4):1409.
75. Crescenzi MA, Cerulli A, Montoro P, Piacente S. Metabolite Profiling for Typization of “Rucola della Piana del Sele” (PGI), *Eruca sativa*, through UHPLC-Q-Exactive-Orbitrap-MS/MS Analysis. *Foods*. 2023 Jan;12(18):3384.

76. Zeb A. Phenolic profile and antioxidant potential of wild watercress (*Nasturtium officinale* L.). SpringerPlus. 2015 Dec;4(1):1–7.
77. Stintzing FC, Kammerer D, Schieber A, Adama H, Nacoulma OG, Carle R. Betacyanins and Phenolic Compounds from *Amaranthus spinosus* L. and *Boerhavia erecta* L. Z Für Naturforschung C. 2004 Feb 1;59(1–2):1–8.
78. Rjeibi I, Ben Saad A, Sdayria J, Feriani A, Ncib S, Allagui MS, et al. HPLC–DAD identification of polyphenols from ethyl acetate extract of *Amaranthus spinosus* leaves and determination of their antioxidant and antinociceptive effects. Inflammopharmacology. 2019 Oct 1;27(5):975–84.
79. Kar A, Bhattacharjee S. Exploring Polyphenol Based Bioactive Antioxidants of Underutilized Herb *Amaranthus Spinousus* L. for Medicinal Purposes. J Explor Res Pharmacol. 2022 Sep 25;7(3):150–62.
80. Cutillo F, DellaGreca M, Gionti M, Previtiera L, Zarrelli A. Phenols and lignans from *Chenopodium album*. Phytochem Anal. 2006;17(5):344–9.
81. Laghari AH, Memon S, Nelofar A, Khan KM, Yasmin A. Determination of free phenolic acids and antioxidant activity of methanolic extracts obtained from fruits and leaves of *Chenopodium album*. Food Chem. 2011 Jun 15;126(4):1850–5.
82. Igile GO, Oleszek W, Jurzysta M, Burda S, Fafunso M, Fasanmade AA. Flavonoids from *Vernonia amygdalina* and their antioxidant activities. J Agric Food Chem. 1994 Nov;42(11):2445–8.
83. Salawu S, Catia G, Innocenti M, Vincieri F, Akindahunsi A, Mulinacci N. HPLC/DAD/MS characterisation and analysis of flavonoids and cinnamoyl derivatives in four Nigerian green-leafy vegetables. Food Chem. 2009 Aug 1;115:1568–74.
84. Johnson C, Lin L, Harnly J, Oladeinde F, Kinyua A, Michelin R, et al. Identification of the Phenolic Components of *Vernonia amygdalina* and *Russelia equisetiformis*. J Nat Prod. 2011 Jan 1;4.
85. Erukainure OL, Chukwuma CI, Sanni O, Matsabisa MG, Islam MdS. Histochemistry, phenolic content, antioxidant, and anti-diabetic activities of *Vernonia amygdalina* leaf extract. J Food Biochem. 2019;43(2):e12737.
86. Dagnon S, Novkova Z, Bojilov D, Nedialkov P, Kouassi Ch. Development of surrogate standards approach for the determination of polyphenols in *Vernonia amygdalina* Del. J Food Compos Anal. 2019 Sep 1;82:103231.
87. Nowak J, Kiss AK, Wambebe C, Katuura E, Kuźma Ł. Phytochemical Analysis of Polyphenols in Leaf Extract from *Vernonia amygdalina* Delile Plant Growing in Uganda. Appl Sci. 2022 Jan;12(2):912.
88. Islam MdS, Yoshimoto M, Yahara S, Okuno S, Ishiguro K, Yamakawa O. Identification and Characterization of Foliar Polyphenolic Composition in Sweetpotato (*Ipomoea batatas* L.) Genotypes. J Agric Food Chem. 2002 Jun 1;50(13):3718–22.
89. Islam MdS, Yoshimoto M, Terahara N, Yamakawa O. Anthocyanin Compositions in Sweetpotato (*Ipomoea batatas* L.) Leaves. Biosci Biotechnol Biochem. 2002 Jan;66(11):2483–6.
90. Zhang L, Tu Z cai, Yuan T, Wang H, Xie X, Fu Z feng. Antioxidants and  $\alpha$ -glucosidase inhibitors from *Ipomoea batatas* leaves identified by bioassay-guided approach and structure-activity relationships. Food Chem. 2016 Oct 1;208:61–7.
91. Luo D, Mu T, Sun H. Profiling of phenolic acids and flavonoids in sweet potato (*Ipomoea batatas* L.) leaves and evaluation of their anti-oxidant and hypoglycemic activities. Food Biosci. 2021 Feb 1;39:100801.
92. Ko JY, Ko MO, Kim DS, Lim SB. Enhanced Production of Phenolic Compounds from Pumpkin Leaves by Subcritical Water Hydrolysis. Prev Nutr Food Sci. 2016 Jun;21(2):132–7.
93. Mashitoa FM, Shoko T, Shai JL, Slabbert RM, Sivakumar D. Changes in Phenolic Metabolites and Biological Activities of Pumpkin Leaves (*Cucurbita moschata* Duchesne ex Poir.) During Blanching. Front Nutr. 2021 Mar 15;8:641939

94. Mashitoo FM, Manhivi V, Slabbert RM, Shai JL, Sivakumar D. Changes in antinutrients, phenolics, antioxidant activities and in vitro  $\alpha$ -glucosidase inhibitory activity in pumpkin leaves (*Cucurbita moschata*) during different domestic cooking methods. *Food Sci Biotechnol.* 2021 Jun 7;30(6):793–800.
95. Elshamy AI, El Gendy AENG, Farrag ARH, Hussein J, Mohamed NA, El-Kashak WA, et al. Shoot aqueous extract of *Manihot esculenta* Crantz (cassava) acts as a protective agent against paracetamol-induced liver injury. *Nat Prod Res.* 2021 Nov 18;35(22):4724–8.
96. Tao H, Cui B, Zhang H, Bekhit AED, Lu F. Identification and characterization of flavonoids compounds in cassava leaves (*Manihot esculenta* Crantz) by HPLC/FTICR-MS. *Int J Food Prop.* 2019 Jan 1;22(1):1134–45.
97. Laya A, Koubala BB. Polyphenols in cassava leaves (*Manihot esculenta* Crantz) and their stability in antioxidant potential after in vitro gastrointestinal digestion. *Heliyon.* 2020 Mar;6(3):e03567.
98. Mustarichie R, Sulistyaningsih S, Runadi D. Antibacterial Activity Test of Extracts and Fractions of Cassava Leaves (*Manihot esculenta* Crantz) against Clinical Isolates of *Staphylococcus epidermidis* and *Propionibacterium acnes* Causing Acne. *Int J Microbiol.* 2020 Jan 29;2020:1–9.
99. Laya A, Koubala BB, Negi PS. Antidiabetic ( $\alpha$ -amylase and  $\alpha$ -glucosidase) and anti-obesity (lipase) inhibitory activities of edible cassava (*Manihot esculenta* Crantz) as measured by in vitro gastrointestinal digestion: effects of phenolics and harvested time. *Int J Food Prop.* 2022 Dec 31;25(1):492–508.
100. Jampa M, Sutthanut K, Weerapreeyakul N, Tukummee W, Wattanathorn J, Muchimapura S. Multiple Bioactivities of *Manihot esculenta* Leaves: UV Filter, Anti-Oxidation, Anti-Melanogenesis, Collagen Synthesis Enhancement, and Anti-Adipogenesis. *Mol Basel Switz.* 2022 Feb 25;27(5):1556.
101. Grayer RJ, Kite GC, Abou-Zaid M, Archer LJ. The application of atmospheric pressure chemical ionisation liquid chromatography–mass spectrometry in the chemotaxonomic study of flavonoids: characterisation of flavonoids from *Ocimum gratissimum* var. *gratissimum*. *Phytochem Anal.* 2000;11(4):257–67.
102. Venuprasad MP, Kumar Kandikattu H, Razack S, Khanum F. Phytochemical analysis of *Ocimum gratissimum* by LC-ESI–MS/MS and its antioxidant and anxiolytic effects. *South Afr J Bot.* 2014 May 1;92:151–8.
103. Irondi EA, Agboola SO, Oboh G, Boligon AA. Inhibitory effect of leaves extracts of *Ocimum basilicum* and *Ocimum gratissimum* on two key enzymes involved in obesity and hypertension in vitro. *J Intercult Ethnopharmacol.* 2016 Aug 22;5(4):396–402.
104. Ganguly S, Kumar J, Seal T. Characterization of secondary metabolites in different parts of *Ocimum gratissimum* L. by in vitro antioxidant activity and high-performance liquid chromatography–diode-array detector analysis. *Pharmacogn Mag.* 2021 Jan 1;17:209.
105. Azuma K, Nakayama M, Koshioka M, Ippoushi K, Yamaguchi Y, Kohata K, et al. Phenolic Antioxidants from the Leaves of *Corchorus olitorius* L. *J Agric Food Chem.* 1999 Oct 1;47(10):3963–6.
106. Hasan H, Jawad E. Phytochemical investigation of leaves and seeds of *corchorus olitorius* l. Cultivated in iraq. *Asian J Pharm Clin Res.* 2018 Nov 7;11:408.
107. Ben Yakoub AR, Abdehedi O, Jridi M, Elfalleh W, Nasri M, Ferchichi A. Flavonoids, phenols, antioxidant, and antimicrobial activities in various extracts from Tossa jute leave (*Corchorus olitorus* L.). *Ind Crops Prod.* 2018 Aug 1;118:206–13.
108. Haridy L, Shakerali S, Alghamdi R. Protective Role of *Corchorus olitorius* L Leaves Extract against Experimentally-induced Hepatotoxicity. 2020.
109. Guzzetti L, Panzeri D, Ulaszewska M, Sacco G, Forcella M, Fusi P, et al. Assessment of Dietary Bioactive Phenolic Compounds and Agricultural Sustainability of an African Leafy Vegetable *Corchorus olitorius* L. *Front Nutr.* 2021 Jul 1;8:667812

110. Atalar MN, Erenler R, Turkan F, Alma MH, Demirtas I, Baran A, et al. Phytochemical analysis and biological activity of *Corchorus olitorius* L.: Quantitative analysis of bioactive compounds by LC–MS/MS, antibacterial, enzyme inhibition, and cytotoxic activities. *Eur J Integr Med.* 2023 Sep 1;62:102290.
111. Manguro LOA, Lemmen P. Phenolics of *Moringa oleifera* leaves. *Nat Prod Res.* 2007 Jan 1;21(1):56–68.
112. Amaglo N, Bennett R, Rosario LC, Rosa E, Lo Turco V, Giuffrida A, et al. Profiling selected phytochemicals and nutrients in different tissues of the multipurpose tree *Moringa oleifera* L., grown in Ghana. *Food Chem.* 2010 Oct 1;122:1047–54.
113. Singh BN, Singh BR, Singh RL, Prakash D, Dhakarey R, Upadhyay G, et al. Oxidative DNA damage protective activity, antioxidant and anti-quorum sensing potentials of *Moringa oleifera*. *Food Chem Toxicol.* 2009 Jun 1;47(6):1109–16.
114. Vongsak B, Sithisarn P, Gritsanapan W. Simultaneous HPLC Quantitative Analysis of Active Compounds in Leaves of *Moringa oleifera* Lam. *J Chromatogr Sci.* 2014 Aug 1;52(7):641–5.
115. Makita C, Chimuka L, Steenkamp P, Cukrowska E, Madala E. Comparative analyses of flavonoid content in *Moringa oleifera* and *Moringa ovalifolia* with the aid of UHPLC-qTOF-MS fingerprinting. *South Afr J Bot.* 2016 Jul;105:116–22.
116. Sankhalkar S, Vernekar V. Quantitative and Qualitative Analysis of Phenolic and Flavonoid Content in *Moringa oleifera* Lam and *Ocimum tenuiflorum* L. *Pharmacogn Res.* 2016;8(1):16–21.
117. Prabakaran M, Kim SH, Sasireka A, Chandrasekaran M, Chung IM. Polyphenol composition and antimicrobial activity of various solvent extracts from different plant parts of *Moringa oleifera*. *Food Biosci.* 2018 Dec 1;26:23–9.
118. Jimoh TO. Enzymes inhibitory and radical scavenging potentials of two selected tropical vegetable (*Moringa oleifera* and *Telfairia occidentalis*) leaves relevant to type 2 diabetes mellitus. *Rev Bras Farmacogn.* 2018 Jan 1;28(1):73–9.
119. El-Hadary AE, Ramadan MF. Antioxidant traits and protective impact of *Moringa oleifera* leaf extract against diclofenac sodium-induced liver toxicity in rats. *J Food Biochem.* 2019 Feb;43(2):e12704.
120. Repajić M, Cegledi E, Zorić Z, Pedisić S, Elez Garofulić I, Radman S, et al. Bioactive Compounds in Wild Nettle (*Urtica dioica* L.) Leaves and Stalks: Polyphenols and Pigments upon Seasonal and Habitat Variations. *Foods.* 2021 Jan;10(1):190.
121. Brahmi-Chendouh N, Piccolella S, Nigro E, Hamri-Zeghichi S, Madani K, Daniele A, et al. *Urtica dioica* L. leaf chemical composition: A never-ending disclosure by means of HR-MS/MS techniques. *J Pharm Biomed Anal.* 2021 Feb 20;195:113892.
122. Koczkodaj S, Przybył JL, Kosakowska O, Węglarz Z, Bączek KB. Intraspecific Variability of Stinging Nettle (*Urtica dioica* L.). *Molecules.* 2023 Jan;28(3):1505.
123. Oszmiański J, Kolniak-Ostek J, Wojdyło A. Characterization and Content of Flavonol Derivatives of *Allium ursinum* L. Plant. *J Agric Food Chem.* 2013 Jan 9;61(1):176–84.
124. Sobolewska D, Podolak I, Makowska-Wąs J. *Allium ursinum*: botanical, phytochemical and pharmacological overview. *Phytochem Rev.* 2015 Feb 1;14(1):81–97.
125. Starke H., Herrmann K. Flavonole und Flavone der Gemüsearten. *Z Lebensm Unters Forch.* 1976;161:25–30
126. Ferreira FS, de Oliveira VS, Chávez DWH, Chaves DS, Riger CJ, Sawaya ACHF, et al. Bioactive compounds of parsley (*Petroselinum crispum*), chives (*Allium schoenoprasum* L) and their mixture (Brazilian cheiro-verde) as promising antioxidant and anti-cholesterol oxidation agents in a food system. *Food Res Int.* 2022 Jan 1;151:110864.
127. Dai X, Jia C, Lu J, Yu Z. The dynamics of bioactive compounds and their contributions to the antioxidant activity of postharvest chive (*Allium schoenoprasum* L.). *Food Res Int.* 2023 Dec;174:113600.

128. Teuber H, Herrmann K. [Flavonol glycosides of leaves and fruits of dill (*Anethum graveolens* L.). II. Phenolics of spices (author's transl)]. *Z Lebensm Unters Forsch.* 1978 Aug 30;167(2):101–4.
129. Erdogan Orhan I, Senol FS, Ozturk N, Celik SA, Pular A, Kan Y. Phytochemical contents and enzyme inhibitory and antioxidant properties of *Anethum graveolens* L. (dill) samples cultivated under organic and conventional agricultural conditions. *Food Chem Toxicol.* 2013 Sep;59:96–103.
130. Wasli H, Jelali N, Silva AMS, Ksouri R, Cardoso SM. Variation of polyphenolic composition, antioxidants and physiological characteristics of dill (*Anethum graveolens* L.) as affected by bicarbonate-induced iron deficiency conditions. *Ind Crops Prod.* 2018 Dec 15;126:466–76.
131. Oganesyanyan ET, Nersesyanyan ZM, Parkhomenko AY. Chemical composition of the above-ground part of *Coriandrum sativum*. *Pharm Chem J.* 2007 Mar;41(3):149–53.
132. Nambiar VS, Daniel M, Guin P. CHARACTERIZATION OF POLYPHENOLS FROM CORIANDER LEAVES (*CORIANDRUM SATIVUM*), RED AMARANTHUS (*A. PANICULATUS*) AND GREEN AMARANTHUS (*A. FRUMENTACEUS*) USING PAPER CHROMATOGRAPHY: AND THEIR HEALTH IMPLICATIONS. *J Herb Med.*
133. Barros L, Dueñas M, Dias MI, Sousa MJ, Santos-Buelga C, Ferreira ICFR. Phenolic profiles of in vivo and in vitro grown *Coriandrum sativum* L. *Food Chem.* 2012 May 15;132(2):841–8.
134. Msaada K, Jemia MB, Salem N, Bachrouch O, Sriti J, Tammar S, et al. Antioxidant activity of methanolic extracts from three coriander (*Coriandrum sativum* L.) fruit varieties. *Arab J Chem.* 2017 May 1;10:S3176–83.
135. Yoshikawa M, Uemura T, Shimoda H, Kishi A, Kawahara Y, Matsuda H. Medicinal foodstuffs. XVIII. Phytoestrogens from the aerial part of *Petroselinum crispum* Mill. (Parsley) and structures of 6"-acetylapiin and a new monoterpene glycoside, petroside. *Chem Pharm Bull (Tokyo).* 2000 Jul;48(7):1039–44.
136. Chaves DSA, Frattani FS, Assafim M, de Almeida AP, de Zingali RB, Costa SS. Phenolic chemical composition of *Petroselinum crispum* extract and its effect on haemostasis. *Nat Prod Commun.* 2011 Jul;6(7):961–4.
137. Gadi D, Bnouham M, Aziz M, Ziyat A, Legssyer A, Bruel A, et al. Flavonoids Purified from Parsley Inhibit Human Blood Platelet Aggregation and Adhesion to Collagen under Flow. *J Complement Integr Med.* 2012 Aug 10;9:Article 19.
138. de Oliveira VS, Chávez DWH, Paiva PRF, Gamallo OD, Castro RN, Sawaya ACHF, et al. Parsley (*Petroselinum crispum* Mill.): A source of bioactive compounds as a domestic strategy to minimize cholesterol oxidation during the thermal preparation of omelets. *Food Res Int.* 2022 Jun 1;156:111199.
139. Obolskiy D, Pischel I, Feistel B, Glotov N, Heinrich M. *Artemisia dracunculus* L. (tarragon): a critical review of its traditional use, chemical composition, pharmacology, and safety. *J Agric Food Chem.* 2011 Nov 9;59(21):11367–84.
140. Mumivand H, Babalar M, Tabrizi L, Craker L, Shokrpour M, Hadian J. Antioxidant properties and principal phenolic phytochemicals of Iranian tarragon (*Artemisia dracunculus* L.) accessions. *Hortic Environ Biotechnol.* 2017 Aug 1;58:414–22.
141. Majdan M, Kiss AK, Hałasa R, Granica S, Osińska E, Czerwińska ME. Inhibition of Neutrophil Functions and Antibacterial Effects of Tarragon (*Artemisia dracunculus* L.) Infusion—Phytochemical Characterization. *Front Pharmacol.* 2020 Aug 13;11:947
142. Ekiert H, Świątkowska J, Knut E, Klin P, Rzepiela A, Tomczyk M, et al. *Artemisia dracunculus* (Tarragon): A Review of Its Traditional Uses, Phytochemistry and Pharmacology. *Front Pharmacol.* 2021 Apr 13;12:653993.
143. Barros L, Dueñas M, Dias MI, Sousa MJ, Santos-Buelga C, Ferreira ICFR. Phenolic profiles of cultivated, in vitro cultured and commercial samples of *Melissa officinalis* L. infusions. *Food Chem.* 2013 Jan;136(1):1–8.
144. Nurzyńska-Wierdak R, Bogucka-Kocka A, Szymczak G. Volatile constituents of *Melissa officinalis* leaves determined by plant age. *Nat Prod Commun.* 2014 May;9(5):703–6.

145. Shakeri A, Sahebkar A, Javadi B. *Melissa officinalis* L. – A review of its traditional uses, phytochemistry and pharmacology. *J Ethnopharmacol.* 2016 Jul;188:204–28.
146. Gayibova S, Ivanišová E, Árvay J., Hrstková M., Slávik M., Petrová J, et al. IN VITRO SCREENING OF ANTIOXIDANT AND ANTIMICROBIAL ACTIVITIES OF MEDICINAL PLANTS GROWING IN SLOVAKIA. *J Microbiol Biotechnol Food Sci.* 2019 Jun 1;8(6):1281–9.
147. Ghiulai R, Avram S, Stoian D, Pavel IZ, Coricovac D, Oprean C, et al. Lemon Balm Extracts Prevent Breast Cancer Progression *In Vitro* and *In Ovo* on Chorioallantoic Membrane Assay. *Evid Based Complement Alternat Med.* 2020 Apr 14;2020:e6489159.
148. Fatiha B, Didier H, Naima G, Khodir M, Martin K, Léocadie K, et al. Phenolic composition, in vitro antioxidant effects and tyrosinase inhibitory activity of three Algerian *Mentha* species: *M. spicata* (L.), *M. pulegium* (L.) and *M. rotundifolia* (L.) Huds (Lamiaceae). *Ind Crops Prod.* 2015 Nov 15;74:722–30.
149. Cirlini M, Mena P, Tassotti M, Herrlinger KA, Nieman KM, Dall’Asta C, et al. Phenolic and Volatile Composition of a Dry Spearmint (*Mentha spicata* L.) Extract. *Molecules.* 2016 Aug;21(8):1007.
150. Li X, Tian T. Phytochemical Characterization of *Mentha spicata* L. Under Differential Dried-Conditions and Associated Nephrotoxicity Screening of Main Compound With Organ-on-a-Chip. *Front Pharmacol.* 2018 Sep 28;9:1067
151. Skoula M, Grayer RJ, Kite GC, Veitch NC. Exudate flavones and flavanones in *Origanum* species and their interspecific variation. *Biochem Syst Ecol.* 2008 Aug;36(8):646–54.
152. Sellami IH, Maamouri E, Chahed T, Wannas WA, Kchouk ME, Marzouk B. Effect of growth stage on the content and composition of the essential oil and phenolic fraction of sweet marjoram (*Origanum majorana* L.). *Ind Crops Prod.* 2009 Nov;30(3):395–402.
153. Roby MHH, Sarhan MA, Selim KAH, Khalel KI. Evaluation of antioxidant activity, total phenols and phenolic compounds in thyme (*Thymus vulgaris* L.), sage (*Salvia officinalis* L.), and marjoram (*Origanum majorana* L.) extracts. *Ind Crops Prod.* 2013 May 1;43:827–31.
154. Kaliora AC, Kogiannou DAA, Kefalas P, Papassideri IS, Kalogeropoulos N. Phenolic profiles and antioxidant and anticarcinogenic activities of Greek herbal infusions; balancing delight and chemoprevention? *Food Chem.* 2014 Jan;142:233–41.
155. Hossain MB, Camphuis G, Aguiló-Aguayo I, Gangopadhyay N, Rai DK. Antioxidant activity guided separation of major polyphenols of marjoram (*Origanum majorana* L.) using flash chromatography and their identification by liquid chromatography coupled with electrospray ionization tandem mass spectrometry†. *J Sep Sci.* 2014;37(22):3205–13.
156. Taamalli A, Arráez-Román D, Abaza L, Iswaldi I, Fernández-Gutiérrez A, Zarrouk M, et al. LC-MS-based metabolite profiling of methanolic extracts from the medicinal and aromatic species *Mentha pulegium* and *Origanum majorana*. *Phytochem Anal.* 2015;26(5):320–30.
157. Makrane H, El Messaoudi M, Melhaoui A, El Mzibri M, Benbacer L, Aziz M. Cytotoxicity of the Aqueous Extract and Organic Fractions from *Origanum majorana* on Human Breast Cell Line MDA-MB-231 and Human Colon Cell Line HT-29. *Adv Pharmacol Pharm Sci.* 2018 Aug 23;2018:e3297193.
158. Khadhri A, Bouali I, Aouadhi C, Lagel MC, Masson E, Pizzi A. Determination of phenolic compounds by MALDI-TOF and essential oil composition by GC-MS during three development stages of *Origanum majorana* L. *Biomed Chromatogr.* 2019;33(11):e4665.
159. Creydt M, Flügge F, Dammann R, Schütze B, Günther UL, Fischer M. Food Fingerprinting: LC-ESI-IM-QTOF-Based Identification of Blumeatin as a New Marker Metabolite for the Detection of *Origanum majorana* Admixtures to *O. onites/vulgare*. *Metabolites.* 2023 May;13(5):673.

160. Kikuzaki H, Nakatani N. Structure of a New Antioxidative Phenolic Acid from Oregano (*Origanum vulgare* L.). *Agric.Biol. Chem.* 1989 Feb; 53(2):519-524.
161. Lin Y, Wang C, Shiao Y, Liu T, Wang W. Benzolignanoid and polyphenols from *Origanum vulgare*. *Journal of the Chinese Chemical Society.* 2003; 50(5):1079-1083.
162. Grevsen K, Fretté X, Christensen LP. Content and Composition of Volatile Terpenes, Flavonoids and Phenolic Acids in Greek Oregano (*Origanum vulgare* L. ssp *hirtum*) at different Development Stages during Cultivation in Cool Temperate Climate. *Eur J Hortic Sci.* 2009 Oct 1;74:193–203.
163. Hossain MB, Rai DK, Brunton NP, Martin-Diana AB, Barry-Ryan C. Characterization of Phenolic Composition in Lamiaceae Spices by LC-ESI-MS/MS. *J Agric Food Chem.* 2010 Oct 13;58(19):10576–81.
164. Liu H, Zheng A, Liu H, Yu H, Wu X, Xiao C, et al. Identification of Three Novel Polyphenolic Compounds, Origanine A–C, with Unique Skeleton from *Origanum vulgare* L. Using the Hyphenated LC-DAD-SPE-NMR/MS Methods. *J Agric Food Chem.* 2012 Jan 11;60(1):129–35.
165. Venkateswara Rao G, Mukhopadhyay T, Annamalai T, Radhakrishnan N, Sahoo MR. Chemical constituents and biological studies of *Origanum vulgare* Linn. *Pharmacogn Res.* 2011;3(2):143–5.
166. Koldaş S, Demirtas I, Ozen T, Demirci MA, Behçet L. Phytochemical screening, anticancer and antioxidant activities of *Origanum vulgare* L. ssp. *viride* (Boiss.) Hayek, a plant of traditional usage. *J Sci Food Agric.* 2015;95(4):786–98.
167. Vujicic M, Nikolic I, Kontogianni VG, Saksida T, Charisiadis P, Orescanin-Dusic Z, et al. Methanolic extract of *Origanum vulgare* ameliorates type 1 diabetes through antioxidant, anti-inflammatory and anti-apoptotic activity. *Br J Nutr.* 2015 Mar;113(5):770–82.
168. Gonçalves S, Moreira E, Grosso C, Andrade PB, Valentão P, Romano A. Phenolic profile, antioxidant activity and enzyme inhibitory activities of extracts from aromatic plants used in Mediterranean diet. *J Food Sci Technol.* 2017 Jan 1;54(1):219–27.
169. Lu Y, Yeap Foo L. Flavonoid and phenolic glycosides from *Salvia officinalis*. *Phytochemistry.* 2000 Oct 1;55(3):263–7.
170. Velickovic DT, Ristic MS, Randjelovic NV, Smelcerovic AA. Chemical Composition and Antimicrobial Characteristic of the Essential Oils Obtained from the Flower, Leaf and Stem of *Salvia officinalis* L. Originating from Southeast Serbia. *J Essent Oil Res.* 2002 Nov 1;14(6):453–8.
171. Zimmermann BF, Walch SG, Tinzoh LN, Stühlinger W, Lachenmeier DW. Rapid UHPLC determination of polyphenols in aqueous infusions of *Salvia officinalis* L. (sage tea). *J Chromatogr B.* 2011 Aug 15;879(24):2459–64.
172. Dragović-Uzelac V, Elez Garofulić I, Jukić M, Penić M, Dent M. The Influence of Microwave-Assisted Extraction on the Isolation of Sage (*Salvia officinalis* L.) Polyphenols. *Food Technol Biotechnol.* 2012 Sep 14;50(3):377–83.
173. Kontogianni VG, Tomic G, Nikolic I, Nerantzaki AA, Sayyad N, Stosic-Grujicic S, et al. Phytochemical profile of *Rosmarinus officinalis* and *Salvia officinalis* extracts and correlation to their antioxidant and anti-proliferative activity. *Food Chem.* 2013 Jan 1;136(1):120–9.
174. Velamuri R, Sharma Y, Fagan J, Schaefer J. Application of UHPLC-ESI-QTOF-MS in Phytochemical Profiling of Sage (*Salvia officinalis*) and Rosemary (*Rosmarinus officinalis*). *Planta Medica Int Open.* 2020 Nov;07(4):e133–44.
175. Borrás-Linares I, Stojanović Z, Quirantes-Piné R, Arráez-Román D, Švarc-Gajić J, Fernández-Gutiérrez A, et al. *Rosmarinus Officinalis* Leaves as a Natural Source of Bioactive Compounds. *Int J Mol Sci.* 2014 Nov;15(11):20585–606.
176. Mena P, Cirlini M, Tassotti M, Herrlinger KA, Dall’Asta C, Del Rio D. Phytochemical Profiling of Flavonoids, Phenolic Acids, Terpenoids, and Volatile Fraction of a Rosemary (*Rosmarinus officinalis* L.) Extract. *Molecules.* 2016 Nov;21(11):1576.

177. Sharma Y, Velamuri R, Fagan J, Schaefer J. Full-Spectrum Analysis of Bioactive Compounds in Rosemary (*Rosmarinus officinalis* L.) as Influenced by Different Extraction Methods. *Molecules*. 2020 Jan;25(20):4599.
178. Pereira E, Pimenta AI, Calhella RC, Antonio AL, Verde SC, Barros L, et al. Effects of gamma irradiation on cytotoxicity and phenolic compounds of *Thymus vulgaris* L. and *Mentha x piperita* L. *LWT - Food Sci Technol*. 2016 Sep;71:370–7.
179. Bistgani ZE, Hashemi M, DaCosta M, Craker L, Maggi F, Morshedloo MR. Effect of salinity stress on the physiological characteristics, phenolic compounds and antioxidant activity of *Thymus vulgaris* L. and *Thymus daenensis* Celak. *Ind Crops Prod*. 2019 Sep 1;135:311–20.
180. Taghouti M, Martins-Gomes C, Félix LM, Schäfer J, Santos JA, Bunzel M, et al. Polyphenol composition and biological activity of *Thymus citriodorus* and *Thymus vulgaris*: Comparison with endemic Iberian *Thymus* species. *Food Chem*. 2020 Nov 30;331:127362.
181. Alejo-Armijo A, Altarejos J, Salido S. Phytochemicals and Biological Activities of Laurel Tree (*Laurus nobilis*). *Nat Prod Commun*. 2017 May;12(5):743-757
182. Zhilyakova et al. STUDYING THE POLYPHENOLIC STRUCTURE OF LAURUS NOBILIS L. LEAVES. 2017 [cited 2023 Nov 2]; Available from: <https://zenodo.org/records/910685>
183. Konovalov DA, Alieva NM. Phenolic compounds of *laurus nobilis* (review). *Pharm Pharmacol*. 2019 Dec 5;7(5):244–59.
184. Heck C i., De Mejia E g. Yerba Mate Tea (*Ilex paraguariensis*): A Comprehensive Review on Chemistry, Health Implications, and Technological Considerations. *J Food Sci*. 2007;72(9):R138–51.
185. Bravo L, Goya L, Lecumberri E. LC/MS characterization of phenolic constituents of mate (*Ilex paraguariensis*, St. Hil.) and its antioxidant activity compared to commonly consumed beverages. *Food Res Int*. 2007 Apr;40(3):393–405.
186. Boaventura BCB, Di Pietro PF, Stefanuto A, Klein GA, de Moraes EC, de Andrade F, et al. Association of mate tea (*Ilex paraguariensis*) intake and dietary intervention and effects on oxidative stress biomarkers of dyslipidemic subjects. *Nutrition*. 2012 Jun 1;28(6):657–64.
187. Bastos DH, Saldanha LA, Catharino RR, Sawaya A, Cunha IB, Carvalho PO, et al. Phenolic Antioxidants Identified by ESI-MS from Yerba Maté (*Ilex paraguariensis*) and Green Tea (*Camelia sinensis*) Extracts. *Molecules*. 2007 Mar;12(3):423–32.
188. Bojić M, Simon Haas V, Šarić D, Maleš Ž. Determination of Flavonoids, Phenolic Acids, and Xanthines in *Mate* Tea (*Ilex paraguariensis* St.-Hil.). *J Anal Methods Chem*. 2013 Jun 6;2013:e658596.
189. Peres RG, Tonin FG, Tavares MFM, Rodriguez-Amaya DB. HPLC-DAD-ESI/MS Identification and Quantification of Phenolic Compounds in *Ilex paraguariensis* Beverages and On-Line Evaluation of Individual Antioxidant Activity. *Molecules*. 2013 Apr;18(4):3859–71.
190. Kaltbach P, Ballert S, Kabrodt K, Schellenberg I. New HPTLC methods for analysis of major bioactive compounds in mate (*Ilex paraguariensis*) tea. *J Food Compos Anal*. 2020 Sep 1;92:103568.
191. Lorini A, Damin FM, de Oliveira DN, Crizel RL, Godoy HT, Galli V, et al. Characterization and quantification of bioactive compounds from *Ilex paraguariensis* residue by HPLC-ESI-QTOF-MS from plants cultivated under different cultivation systems. *J Food Sci*. 2021;86(5):1599–619.
192. Kerr KM, Mabry TJ, Yoser S. 6-Hydroxy- and 6-methoxyflavonoids from *Neurolaena lobata* and *N. macrocephala*. *Phytochemistry*. 1981 Jan 1;20(4):791–4.
193. Karaköse H, Müller A, Kuhnert N. Profiling and Quantification of Phenolics in *Stevia rebaudiana* Leaves. *J Agric Food Chem*. 2015 Oct 21;63(41):9188–98.



194. Myint K zar, Wu K, Xia Y, Fan Y, Shen J, Zhang P, et al. Polyphenols from *Stevia rebaudiana* (Bertoni) leaves and their functional properties. *J Food Sci.* 2020;85(2):240–8.
195. Lee SY, Shaari K. LC–MS metabolomics analysis of *Stevia rebaudiana* Bertoni leaves cultivated in Malaysia in relation to different developmental stages. *Phytochem Anal.* 2022;33(2):249–61.
196. Rabe C, Steenkamp JA, Joubert E, Burger JFW, Ferreira D. Phenolic metabolites from rooibos tea (*Aspalathus linearis*). *Phytochemistry.* 1994 Apr 19;35(6):1559–65.
197. Shimamura N, Miyase T, Umehara K, Warashina T, Fujii S. Phytoestrogens from *Aspalathus linearis*. *Biol Pharm Bull.* 2006;29(6):1271–4.
198. Krafczyk N, Glomb MA. Characterization of Phenolic Compounds in Rooibos Tea. *J Agric Food Chem.* 2008 May 1;56(9):3368–76.
199. Santos JS, Deolindo CTP, Esmerino LA, Genovese MI, Fujita A, Marques MB, et al. Effects of time and extraction temperature on phenolic composition and functional properties of red rooibos (*Aspalathus linearis*). *Food Res Int.* 2016 Nov 1;89:476–87.
200. Damiani E, Carloni P, Rocchetti G, Senizza B, Tiano L, Joubert E, et al. Impact of Cold versus Hot Brewing on the Phenolic Profile and Antioxidant Capacity of Rooibos (*Aspalathus linearis*) Herbal Tea. *Antioxidants.* 2019 Oct;8(10):499.
201. Akinfenwa AO, Abdul NS, Marnewick JL, Hussein AA. Protective Effects of Linearthin and Other Chalcone Derivatives from *Aspalathus linearis* (Rooibos) against UVB Induced Oxidative Stress and Toxicity in Human Skin Cells. *Plants.* 2021 Sep;10(9):1936.
202. Fantoukh OI, Wang YH, Parveen A, Hawwal MF, Ali Z, Al-Hamoud GA, et al. Chemical Fingerprinting Profile and Targeted Quantitative Analysis of Phenolic Compounds from Rooibos Tea (*Aspalathus linearis*) and Dietary Supplements Using UHPLC-PDA-MS. *Separations.* 2022 Jul;9(7):159.
203. Arumugam G, Swamy MK, Sinniah UR. *Plectranthus amboinicus* (Lour.) Spreng: Botanical, Phytochemical, Pharmacological and Nutritional Significance. *Molecules.* 2016 Apr;21(4):369.
204. Sulaiman CT, Deepak M, Balachandran I. Spectrophotometric and tandem mass spectroscopic analysis of Indian borage (*Plectranthus amboinicus* (Lour.) Spreng.) for its polyphenolics characterization. *Beni-Suef Univ J Basic Appl Sci.* 2018 Dec 1;7(4):471–3.
205. Taher M, El-Daly N, El-Khateeb AY, Hassan S, Elsherbiny EA. Chemical Composition, Antioxidant, Antitumor and Antifungal Activities of Methanolic Extracts of *Coleus blumei*, *Plectranthus amboinicus* and *Salvia splendens* (Lamiaceae). *J Agric Chem Biotechnol.* 2021 Nov 1;12(11):177–87.
206. Ślusarczyk S, Cieślak A, Yanza YR, Szumacher-Strabel M, Varadyova Z, Stafiniak M, et al. Phytochemical Profile and Antioxidant Activities of *Coleus amboinicus* Lour. Cultivated in Indonesia and Poland. *Molecules.* 2021 Jan;26(10):2915.
207. Voirin B, Saunois A, Bayet C. Free flavonoid aglycones from *Mentha × piperita*: Developmental, chemotaxonomical and physiological aspects. *Biochem Syst Ecol.* 1994 Jan 1;22(1):95–9.
208. Areias FM, Valentão P, Andrade PB, Ferreres F, Seabra RM. Phenolic fingerprint of peppermint leaves. *Food Chem.* 2001 May 1;73(3):307–11.
209. Boualem M. Identification of *Mentha piperita* L. and *Ricinus communis* L. polyphenols by HPLC-DAD-ESI-MS and evaluation of their insecticidal properties against *Aphis spiraeicola* P. *South Asian J Exp Biol.* 2017 Sep 28;7:7.
210. Elansary HO, Szopa A, Kubica P, Ekiert H, Klimek-Szczykutowicz M, El-Ansary DO, et al. Polyphenol Profile and Antimicrobial and Cytotoxic Activities of Natural *Mentha × piperita* and *Mentha longifolia* Populations in Northern Saudi Arabia. *Processes.* 2020 Apr;8(4):479.

211. Costa G, Ferreira JP, Vitorino C, Pina ME, Sousa JJ, Figueiredo IV, et al. Polyphenols from *Cymbopogon citratus* leaves as topical anti-inflammatory agents. *J Ethnopharmacol*. 2016 Feb 3;178:222–8.
212. Méabed EMH, Abou-Sreeda AIB, Roby MHH. Chemical analysis and giardicidal effectiveness of the aqueous extract of *Cymbopogon citratus* Stapf. *Parasitol Res*. 2018 Jun;117(6):1745-1755.
213. Sousa R, Figueirinha A, Batista MT, Pina ME. Formulation Effects in the Antioxidant Activity of Extract from the Leaves of *Cymbopogon citratus* (DC) Stapf. *Molecules*. 2021 Jan;26(15):4518.
214. Falode JA, Ajigbayi OP, Dada EO, Olofinlade TB, Ajayi, PD, Adeoye, AO, et al. Phytochemical Composition, HPLC-DAD Fingerprinting, Antioxidant and Enzyme Inhibiting Potentials of *Cymbopogon citratus* Leaf Extracts. *FUOYE Journal of Pure and Applied Sciences*. 2022; 7(3), 85-104
215. Ramakrishnan P, Rangiah K. A UHPLC-MS/SRM method for analysis of phenolics from *Camellia sinensis* leaves from Nilgiri hills. *Anal Methods*. 2016 Nov 17;8(45):8033–41.
216. Jeszka-Skowron M, Zgoła-Grzeškowiak A, Frankowski R. *Cistus incanus* a promising herbal tea rich in bioactive compounds: LC–MS/MS determination of catechins, flavonols, phenolic acids and alkaloids—A comparison with *Camellia sinensis*, Rooibos and Hoan Ngoc herbal tea. *J Food Compos Anal*. 2018 Dec 1;74:71–81.
217. Zhu MZ, Zhou F, Ran LS, Li YL, Tan B, Wang KB, Huang JA, Liu ZH. Metabolic Profiling and Gene Expression Analyses of Purple-Leaf Formation in Tea Cultivars (*Camellia sinensis* var. *sinensis* and var. *assamica*). *Front Plant Sci*. 2021 Mar 5;12:606962.
218. Rehecho S, Hidalgo O, García-Iñiguez de Cirano M, Navarro I, Astiasarán I, Ansorena D, et al. Chemical composition, mineral content and antioxidant activity of *Verbena officinalis* L. *LWT - Food Sci Technol*. 2011 May 1;44(4):875–82.
219. Encalada MA, Rehecho S, Ansorena D, Astiasarán I, Cavero RY, Calvo MI. Antiproliferative effect of phenylethanoid glycosides from *Verbena officinalis* L. on Colon Cancer Cell Lines. *LWT - Food Sci Technol*. 2015 Oct 1;63(2):1016–22.
220. Riguene H, Moussaoui Y, Salem R, Ghayth R. Response Surface Methodology as a Predictive Tool and UPLC-HRMS Analysis of Phenolic Rich Extract from *Verbena officinalis* L. Using Microwave-Assisted Extraction: Part I. *Chem Afr*. 2023 May 21;6.
221. Ghareeb MA, Sobeh M, Rezaq S, El-Shazly AM, Mahmoud MF, Wink M. HPLC-ESI-MS/MS Profiling of Polyphenolics of a Leaf Extract from *Alpinia zerumbet* (Zingiberaceae) and Its Anti-Inflammatory, Anti-Nociceptive, and Antipyretic Activities In Vivo. *Molecules*. 2018 Dec;23(12):3238.
222. Cruz JD da, Mpalantinos MA, Oliveira LR de, Branches TG, Xavier A, Souza F das C do A, et al. Nutritional and chemical composition of *Alpinia zerumbet* leaves, a traditional functional food. *Food Res Int*. 2023 Nov 1;173:113417.
